# Supplementary material for: New routes towards azomethine ylide generation from prolines to synthesize diverse N -heterocycles: a DFT supported endo -selective mechanism
Source: Royal Society of Chemistry journal article supplement (doi:10.1039/d4ob01004c), 2024-01-01

## Electronic Supplementary Information

### New routes of azomethine ylide generation from prolines to synthesize diverse *n*-heterocycles: a DFT supported *endo*-selective mechanism

Radha M. Laha<sup>‡a,b</sup>, Shobhon Aich<sup>‡a</sup>, Ankan Kumar Sarkar<sup>c</sup>, Tanmoy Dutta<sup>d</sup>, Narendra N. Ghosh<sup>e</sup>,  
Saikat Khamarui<sup>\*f</sup> and Dilip K. Maiti<sup>\*a</sup>

<sup>a</sup>Dept. of Chemistry, University of Calcutta, 92 A. P. C. Road, Kolkata-700009, India.

<sup>b</sup>Department of Science & Humanities, Murshidabad Institute of Technology, West Bengal-742102, India.

<sup>c</sup>School of Material Science, Indian Association for the Cultivation of Science, Jadavpur, Kolkata-700032, India

<sup>d</sup>Department of Chemistry, JIS College of Engineering, Kalyani, West Bengal 741235, India.

<sup>e</sup>Department of Chemistry, Pakuahat A.N.M. High School, Malda, West Bengal 732138, India

<sup>f</sup>Department of Chemistry, Government General Degree College, Kalna-1, Burdwan-713405, India.

\*Corresponding author. Fax: 91-33-2351 9755, Tel: 91-33-2350 1014

e-mail: [dkmchem@caluniv.ac.in](mailto:dkmchem@caluniv.ac.in); [saikatkhamarui21@gmail.com](mailto:saikatkhamarui21@gmail.com)

| <u>Serial No.</u> | <u>Content</u>                                                                                                                                                                                                                 | <u>Page Number</u> |
|-------------------|--------------------------------------------------------------------------------------------------------------------------------------------------------------------------------------------------------------------------------|--------------------|
| 1.                | Structure elucidation of <b>6g</b> : regio and stereo-selectivity (NOSY spectrum of <b>6g</b> )                                                                                                                                | S-2                |
| 2.                | References                                                                                                                                                                                                                     | S-3                |
| 3.                | <sup>1</sup> H and <sup>13</sup> C-NMR spectra of all the compounds ( <b>6a-j</b> , <b>7a-l</b> , <b>8a-d</b> , <b>9a-j</b> , <b>10a-e</b> ) and <sup>19</sup> F-NMR spectra of <b>6g</b> , <b>7e</b> , <b>9b</b> , <b>10e</b> | S-4                |
| 4.                | CIF data of compound <b>9a</b> (CCDC 1832647) & <b>10e</b> (CCDC 2312186)                                                                                                                                                      | S-48               |
| 5.                | Mass spectra data of intermediates                                                                                                                                                                                             | S-49               |

## 1. Structure elucidation of **6g**: regio and stereo-selectivity

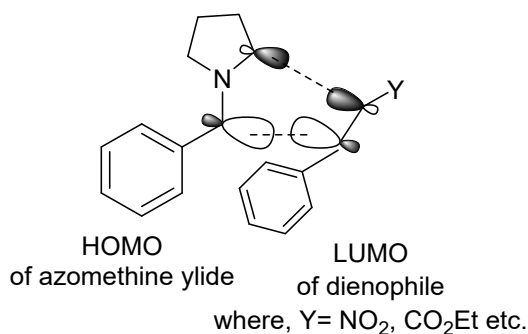

Azomethine ylide derived from L-proline undergoes a [3+2] cycloaddition reaction through the above-mentioned HOMO-LUMO interaction, which accounts for the regioselectivity. There is lots of theoretical and experimental evidence in the literature.<sup>1</sup> The reverse selectivity is observed with azomethine ylide derived from L-proline ester without decarboxylation.<sup>2</sup> The endo-selectivity is discussed in the manuscript with the help of literature.

From the NOESY spectra (SI figure 1) of compound **6g**, it is very clear that more contours are present in the aromatic region apart from the interaction of orthoprotons in aromatic rings. These excess interactions (blue clouded) among the aromatic protons are shown below.

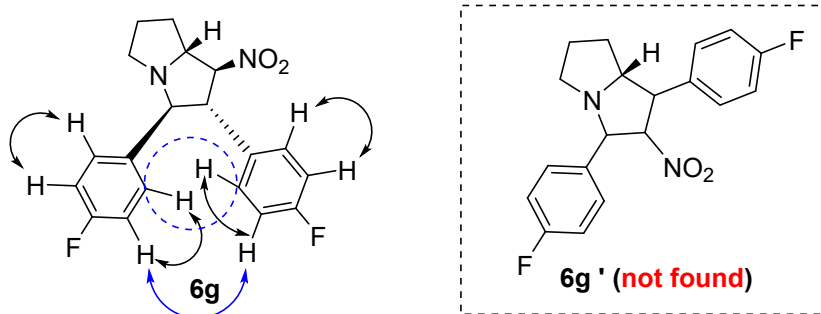

SI Figure 1: NOESY spectra of compound **6g**

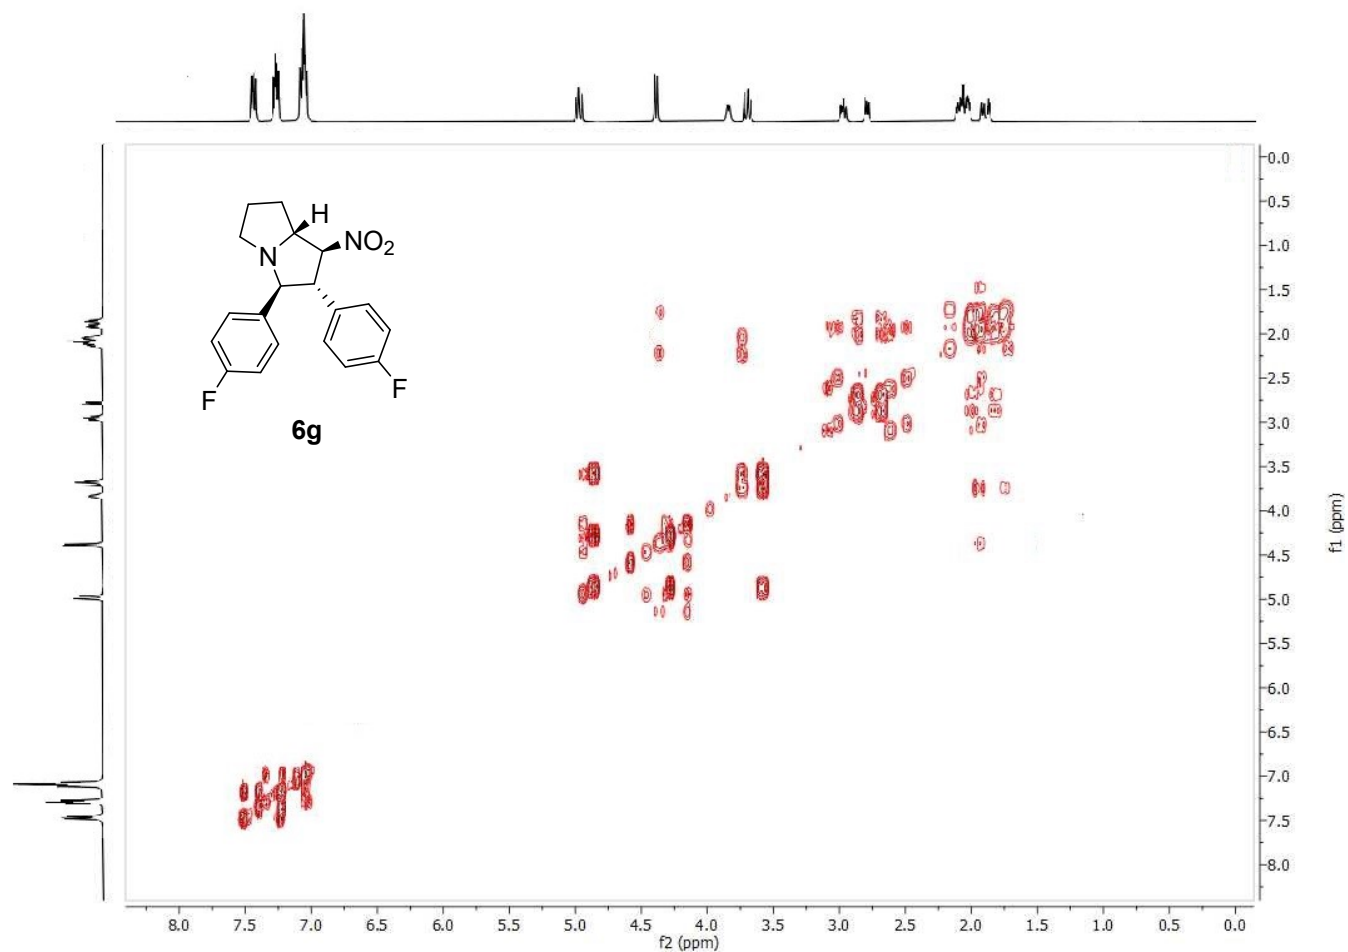

## 2. References

1. K. Alimohammadi, Y. Sarrafi, M. Tajbakhsh, S. Yeganegi, M. Hamzehloueian, *Tetrahedron*, 2011, **67** 1589; (a) Y. Toma, M. Kunigami, K. Watanabe, M. Higashi, S. Arimitsu, *J. Flu. Chem.*, 2016, **189**, 22; (c) K. Alimohammadi, Y. Sarrafi, B. Rajabpour, *C. R. Chimie*, 2014, **17**, 156; (d) T. L. Pavlovska, R. Gr. Redkin, V. V. Lipson, D. V. Atamanuk, *Mol Divers*, 2016, **20**, 299.
2. K. Yamazaki, P. Gabriel, G. D. Carmine, J. Pedroni, M. Farizyan, T. A. Hamlin, D. J. Dixon, *ACS Catal.*, 2021, **11**, 7489.

3.  $^1\text{H}$  and  $^{13}\text{C}$ -NMR spectra of all the compounds 6a-j, 7a-l, 8a-d, 9a-j, 10a-d and  $^{19}\text{F}$ -NMR spectra of 6g, 7e, 9b

SI Figure 2:  $^1\text{H}$  and  $^{13}\text{C}$ -NMR spectra of compound 6a

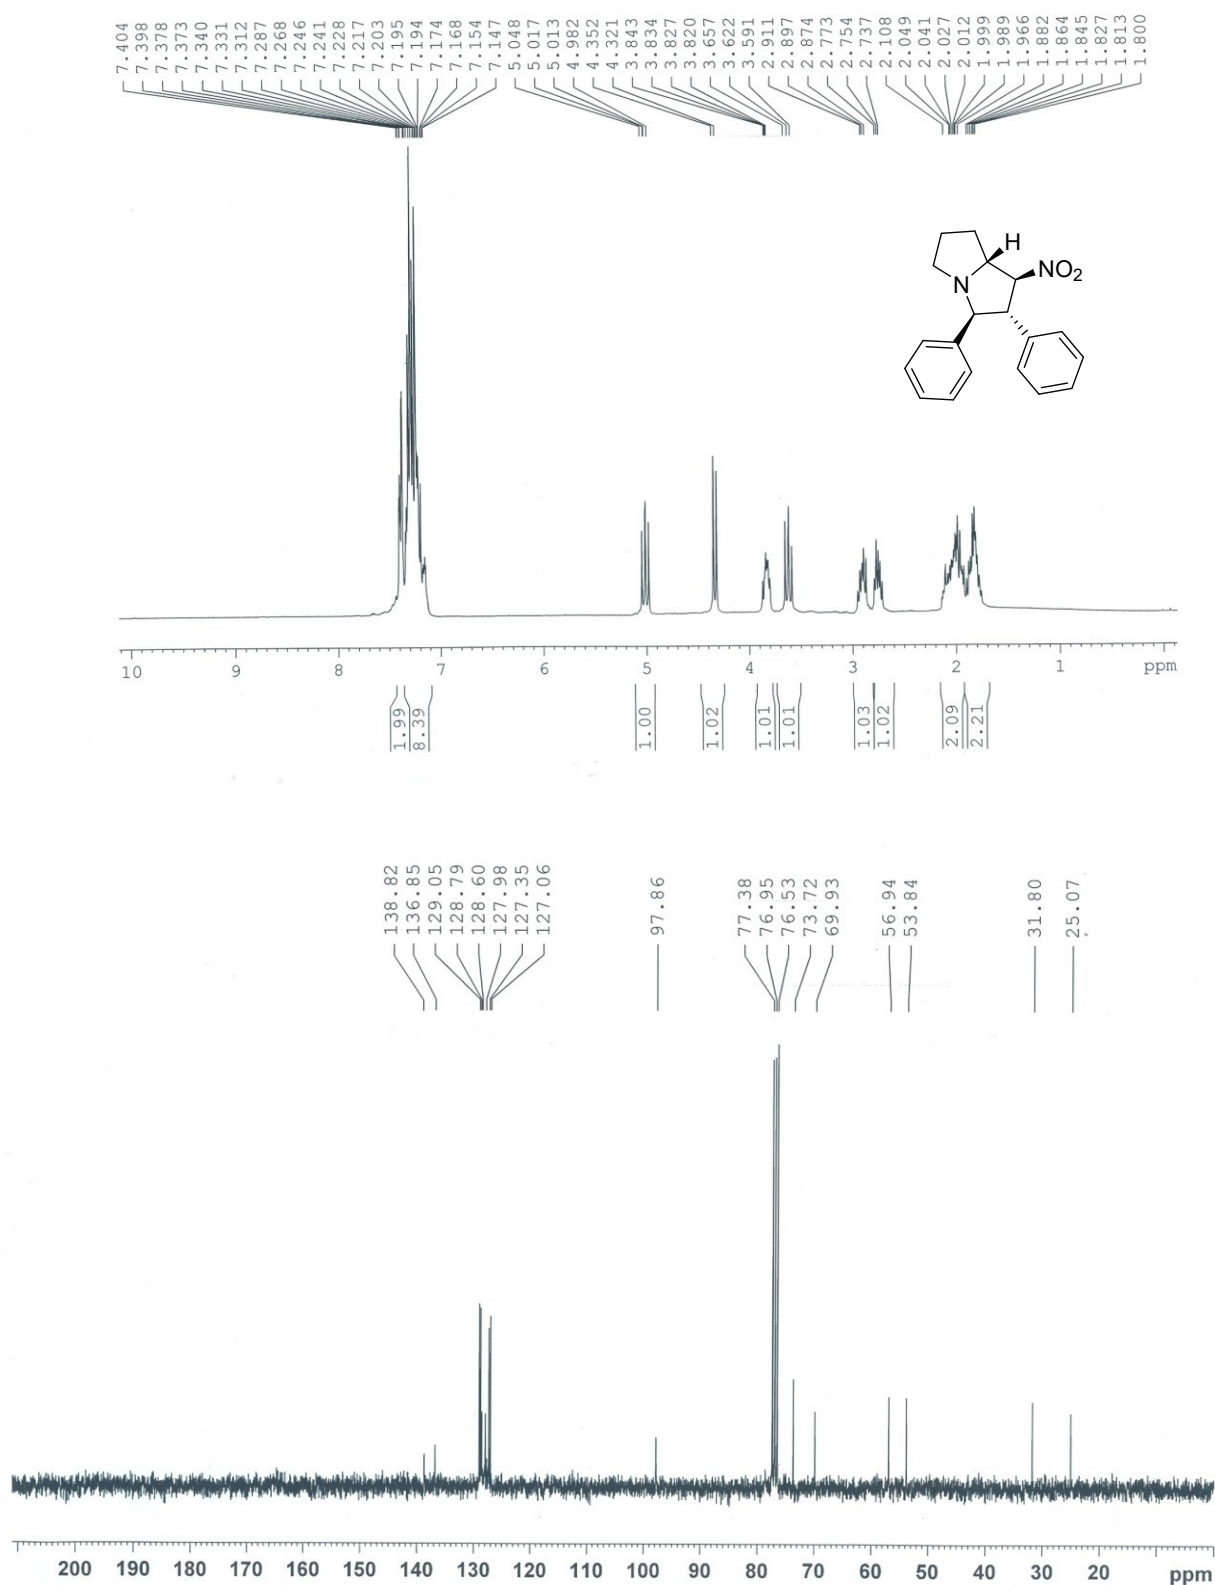



SI Figure 3:  $^1\text{H}$  and  $^{13}\text{C}$ -NMR spectra of compound **6b**

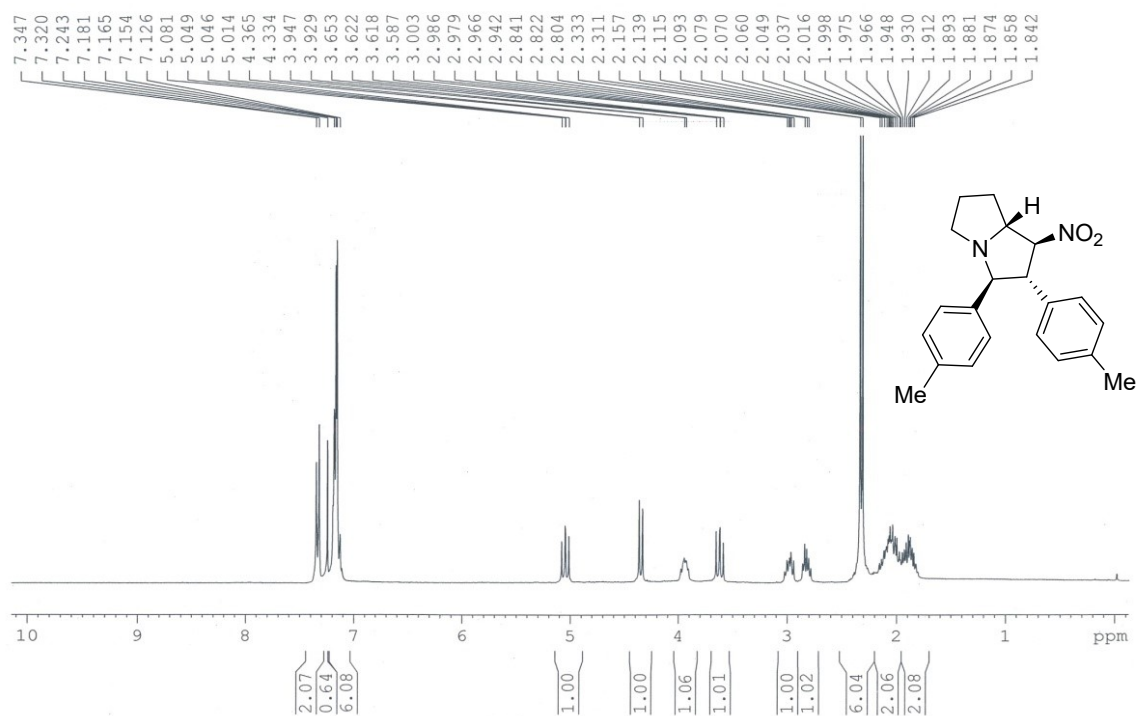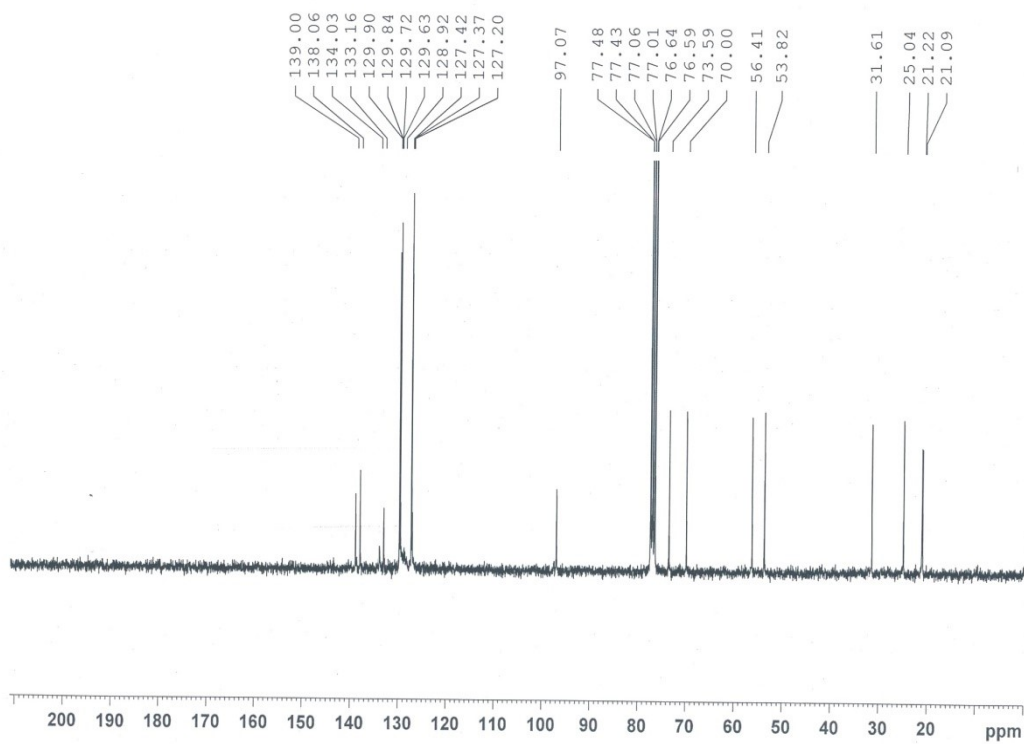

SI Figure 4:  $^1\text{H}$  and  $^{13}\text{C}$ -NMR spectra of compound **6c**

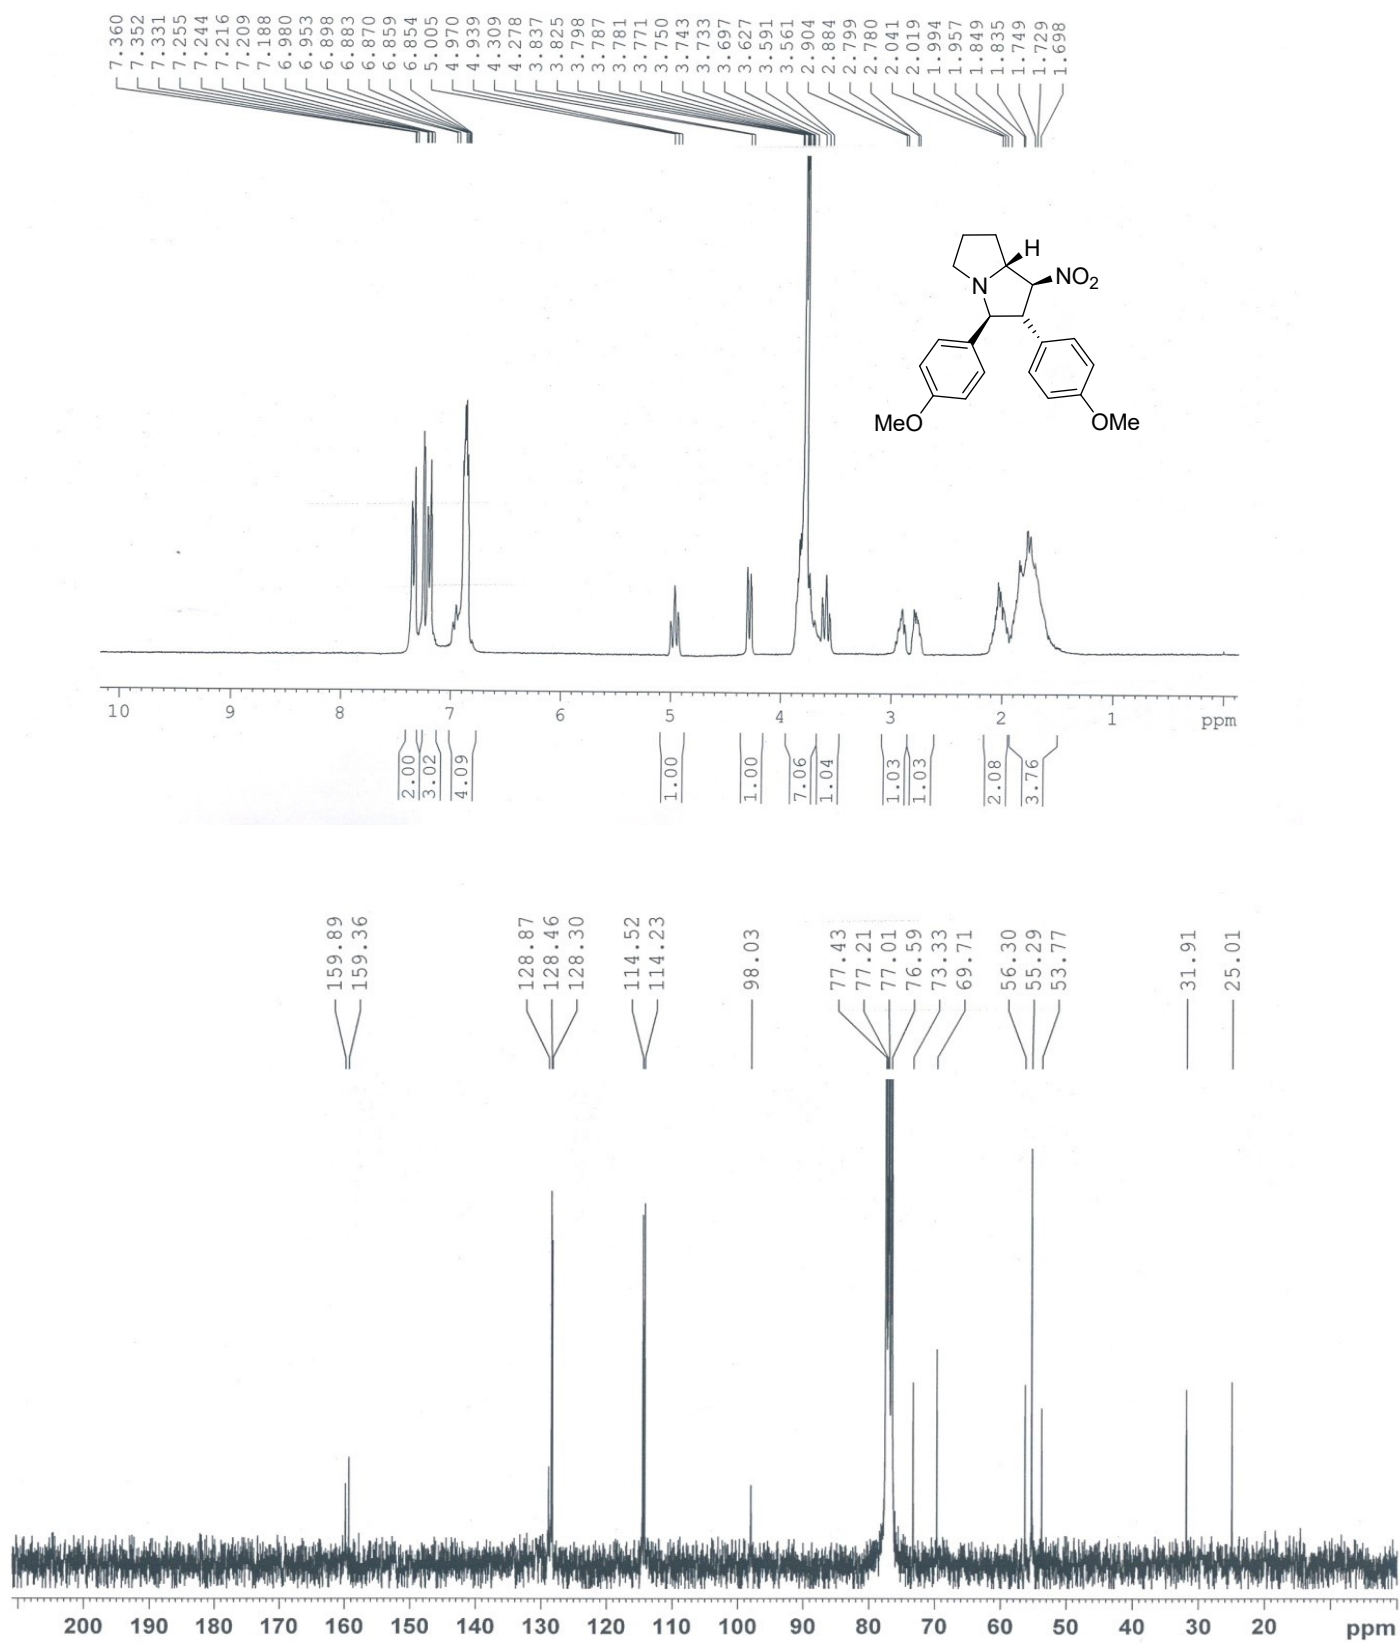

SI Figure 5:  $^1\text{H}$  and  $^{13}\text{C}$ -NMR spectra of compound **6d**

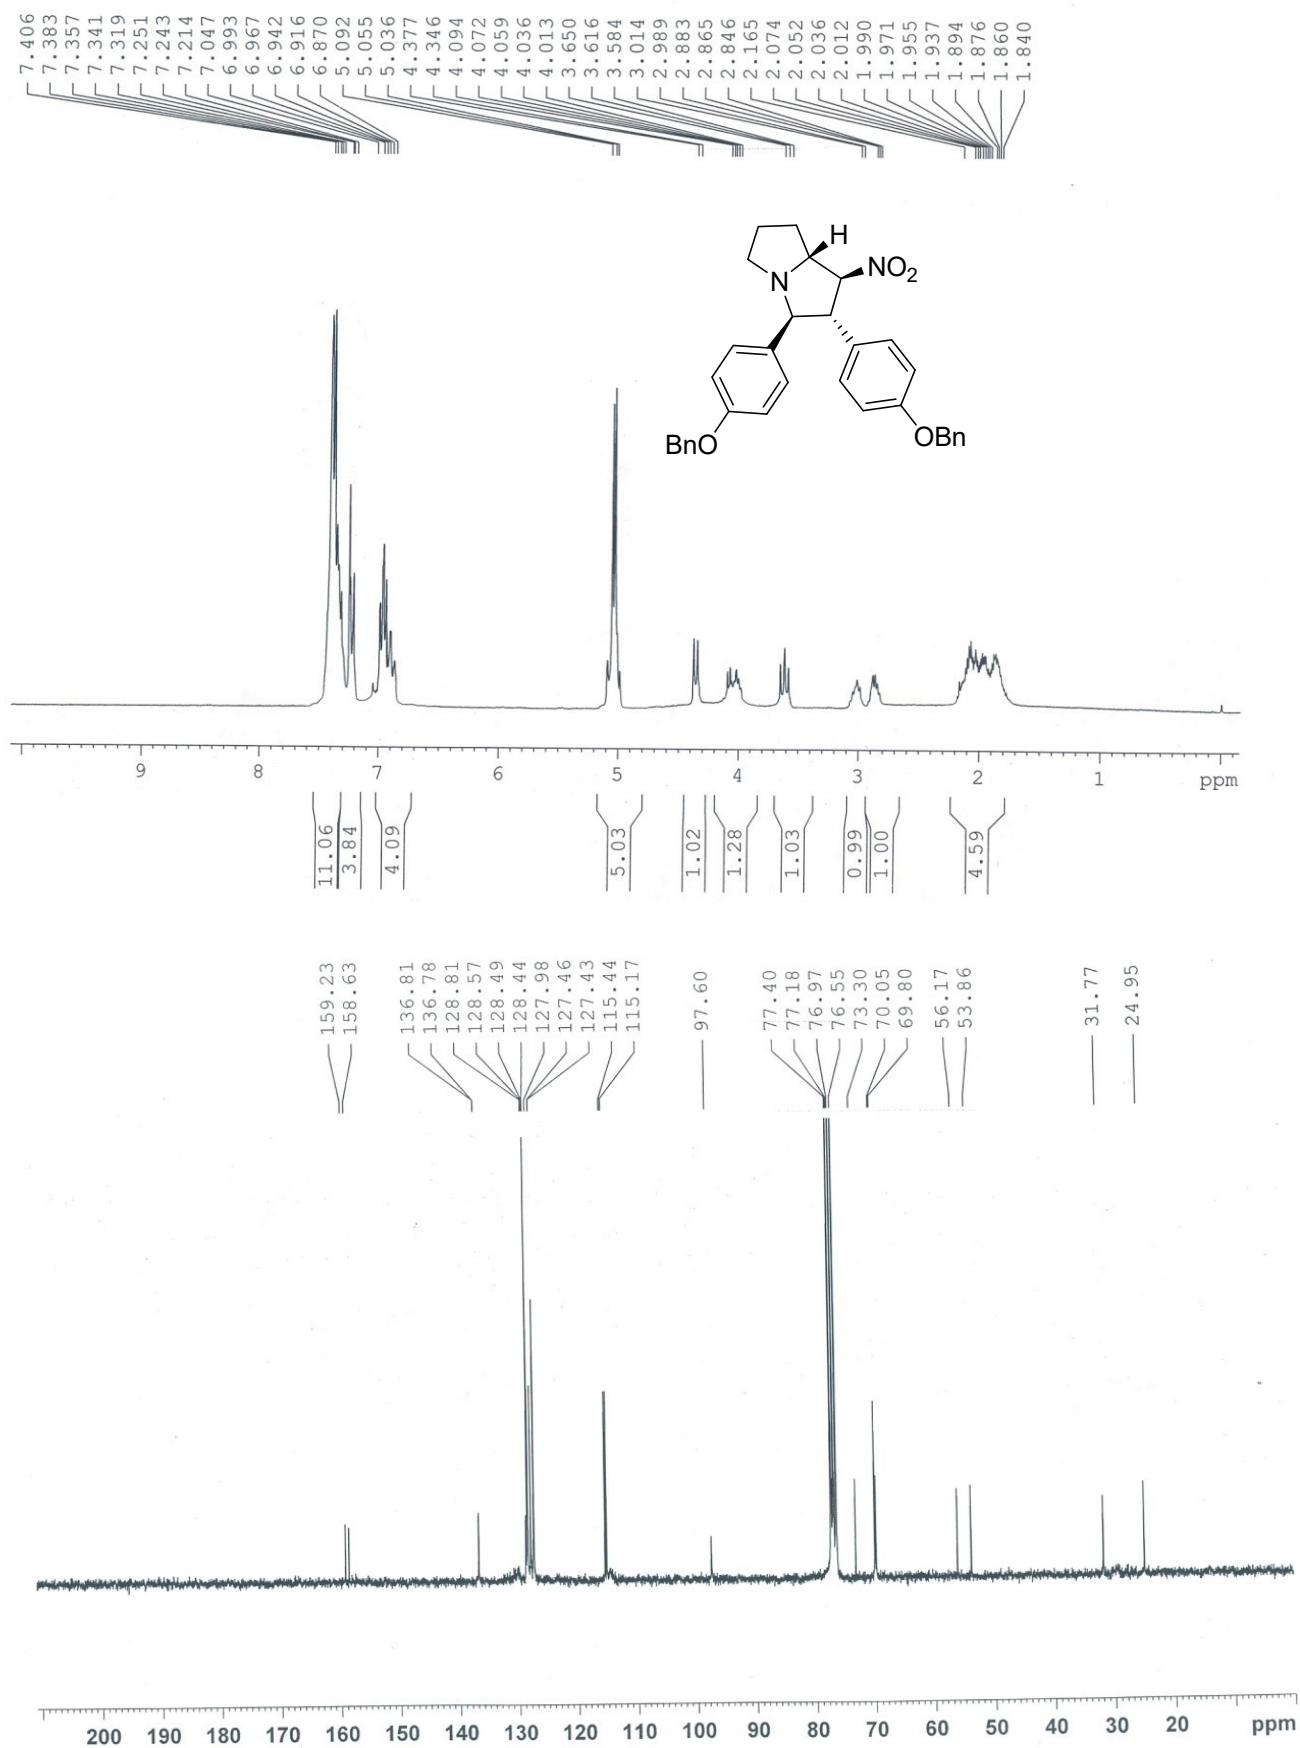

SI Figure 6:  $^1\text{H}$  and  $^{13}\text{C}$ -NMR spectra of compound 6e

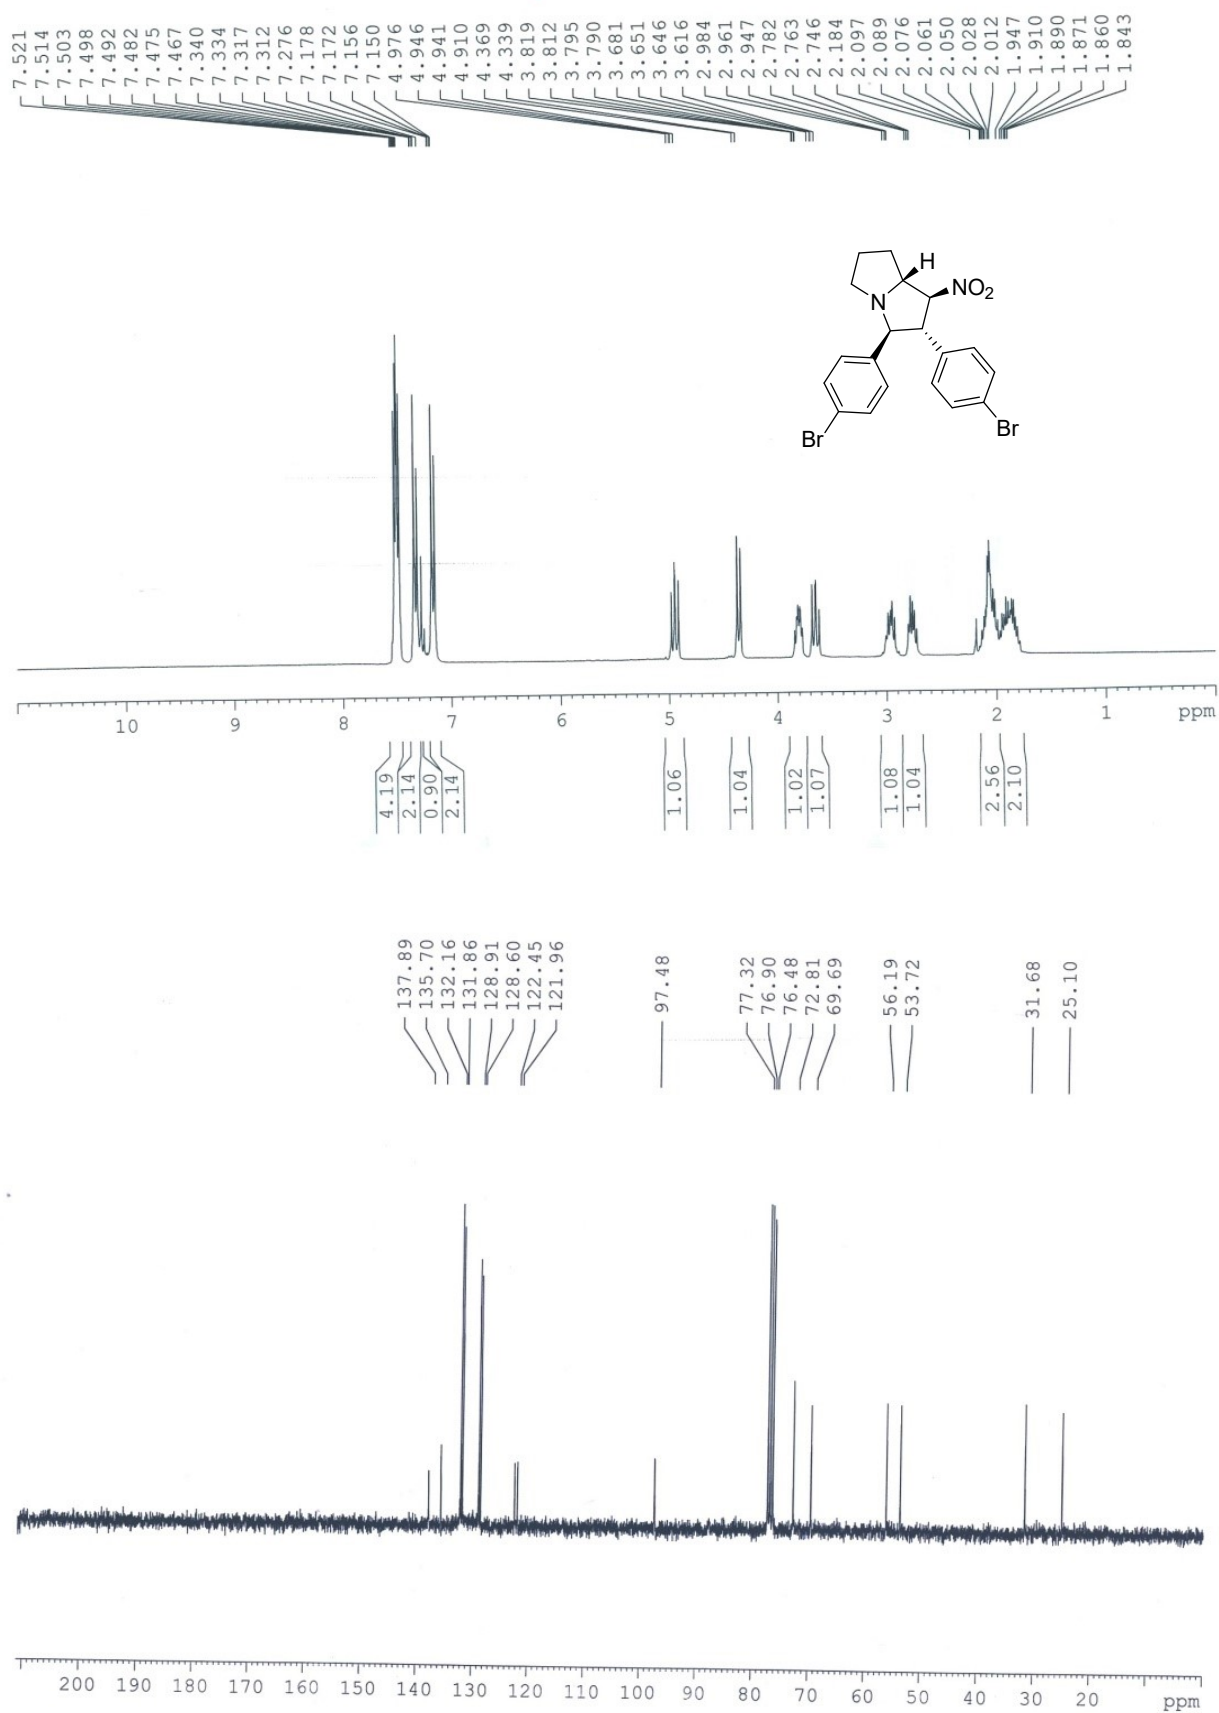

SI Figure 7:  $^1\text{H}$  and  $^{13}\text{C}$ -NMR spectra of compound 6f

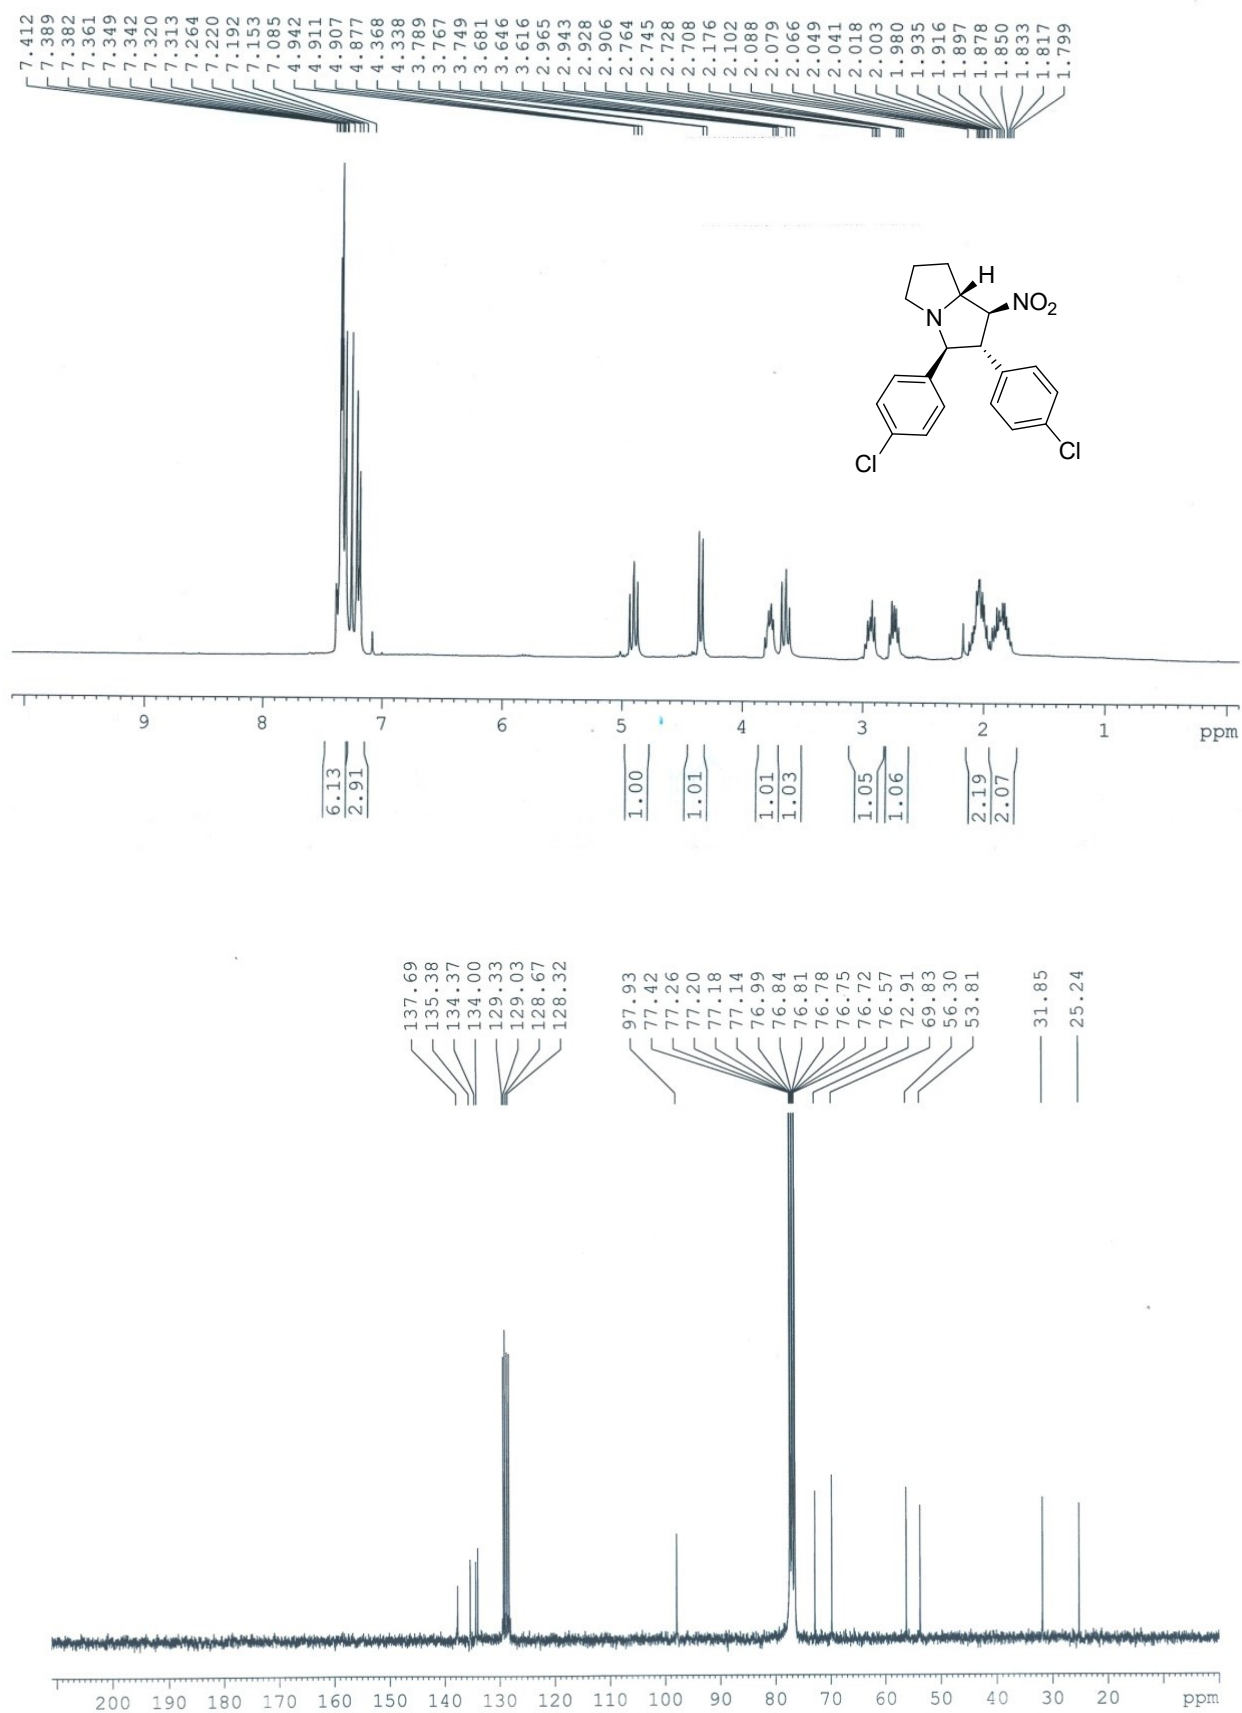

SI Figure 8:  $^1\text{H}$ ,  $^{13}\text{C}$  and  $^{19}\text{F}$ -NMR spectra of compound **6g**

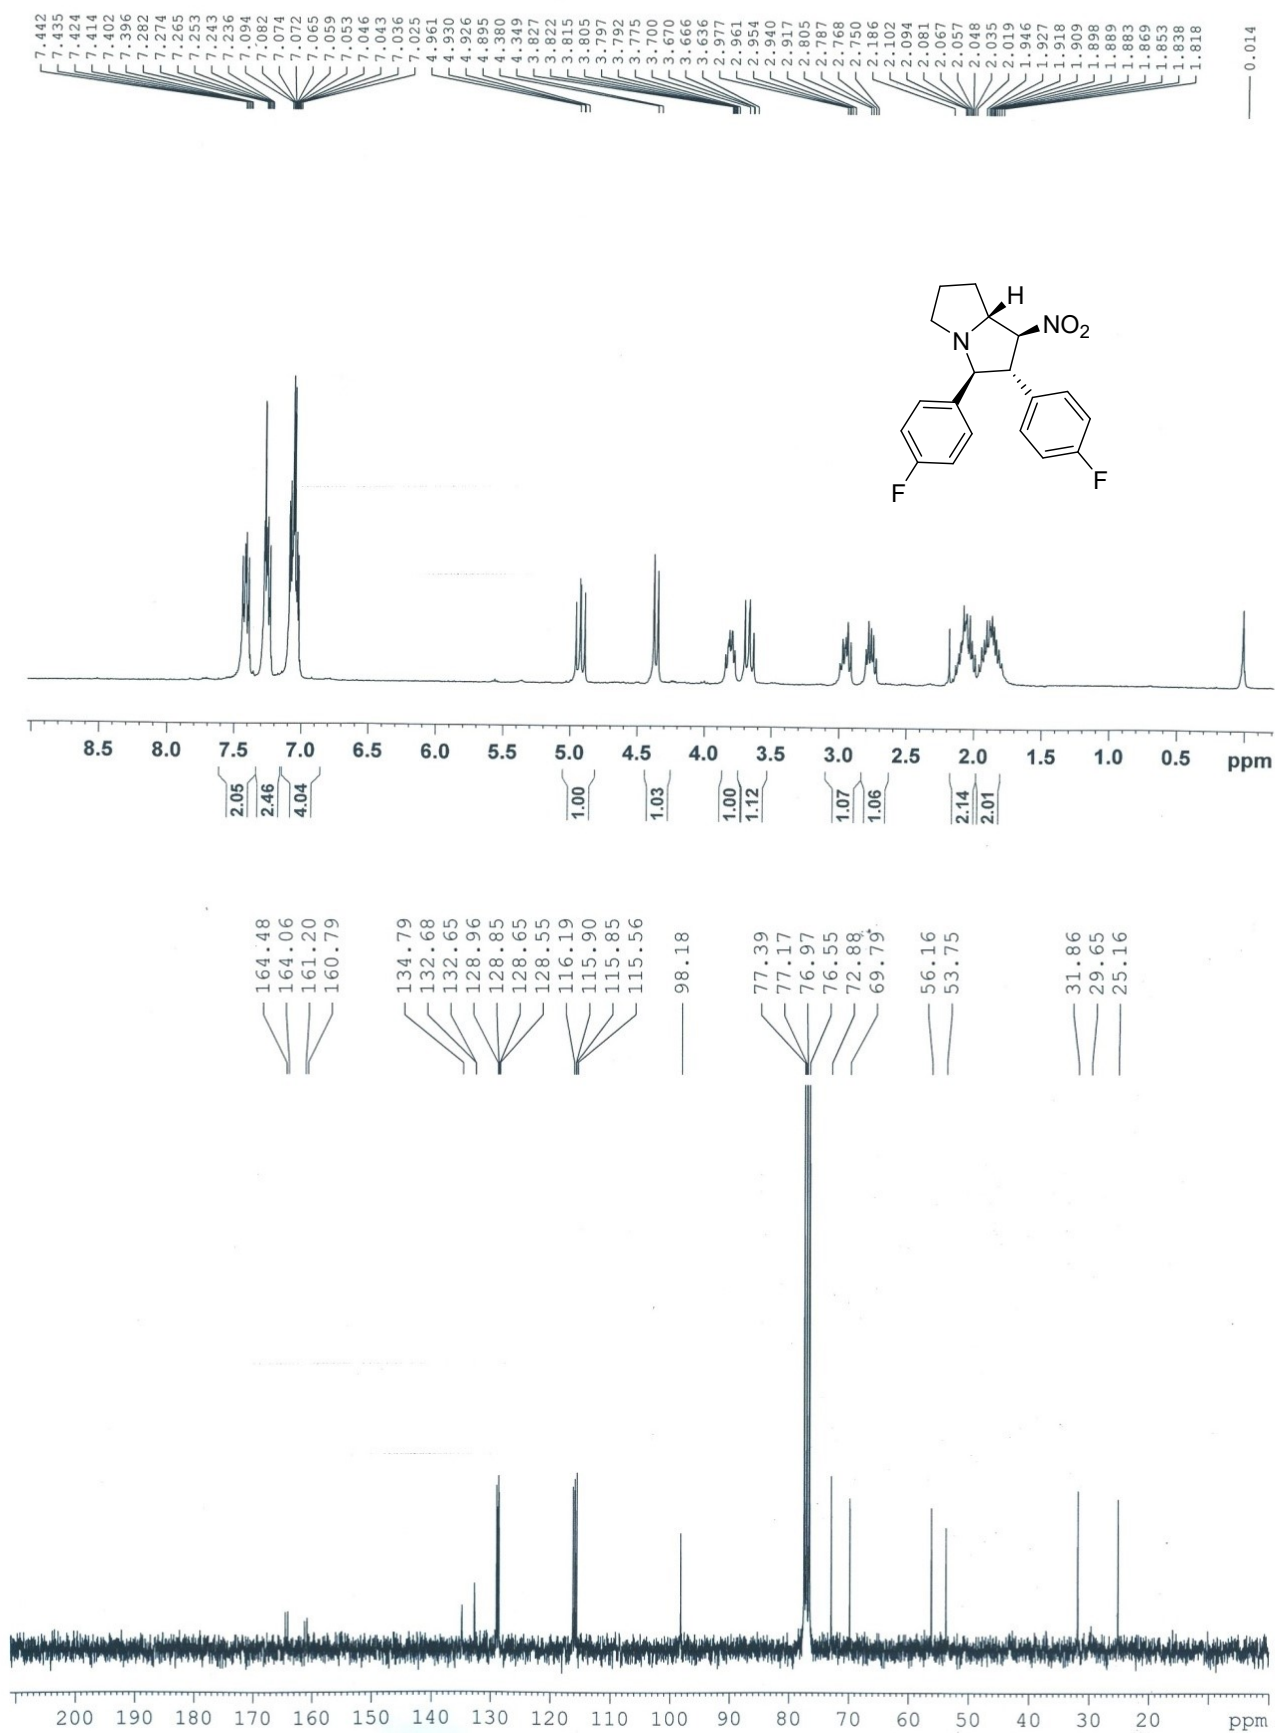



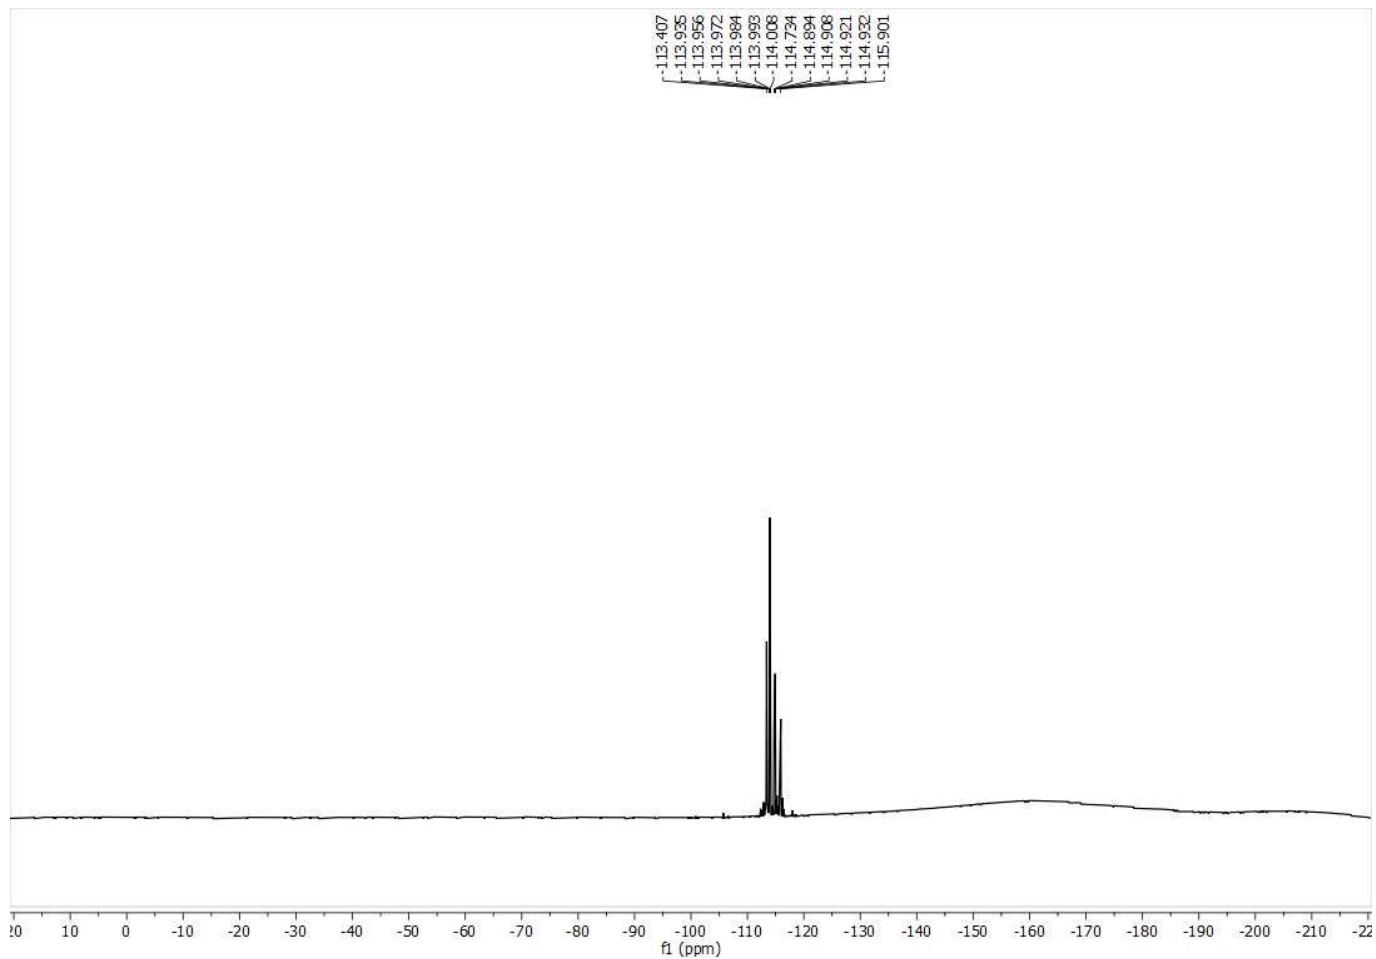

SI Figure 9:  $^1\text{H}$  and  $^{13}\text{C}$ -NMR spectra of compound **6h**

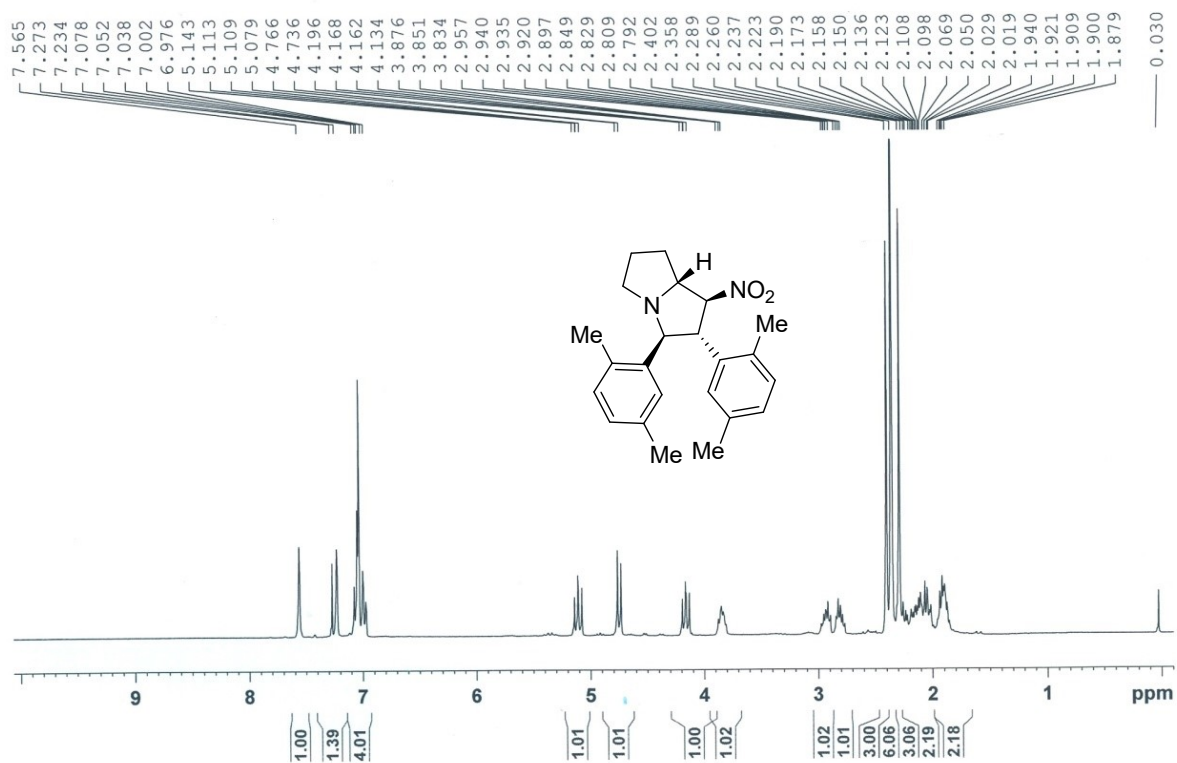

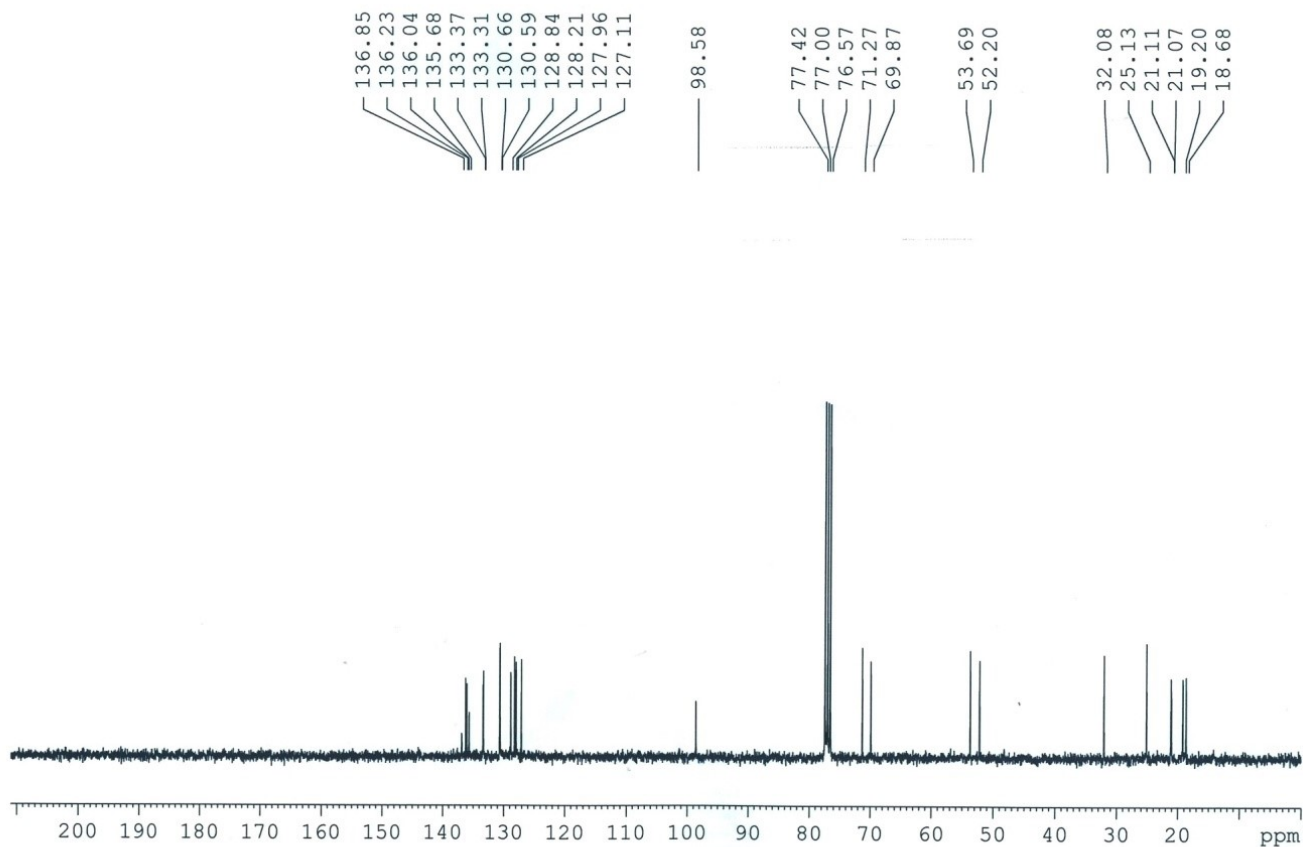

SI Figure 10:  $^1\text{H}$  and  $^{13}\text{C}$ -NMR spectra of compound 6i

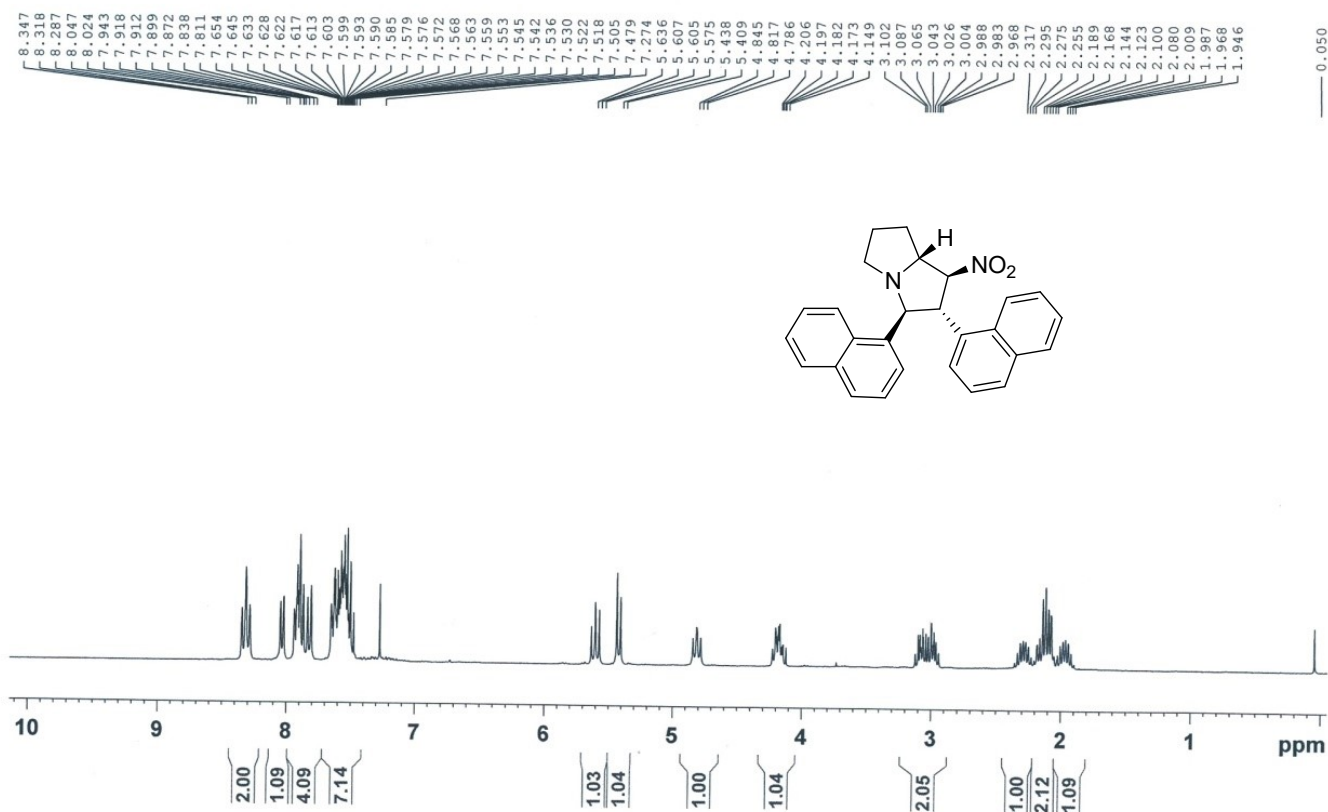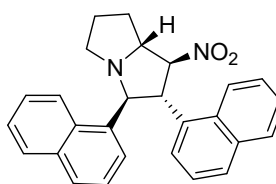



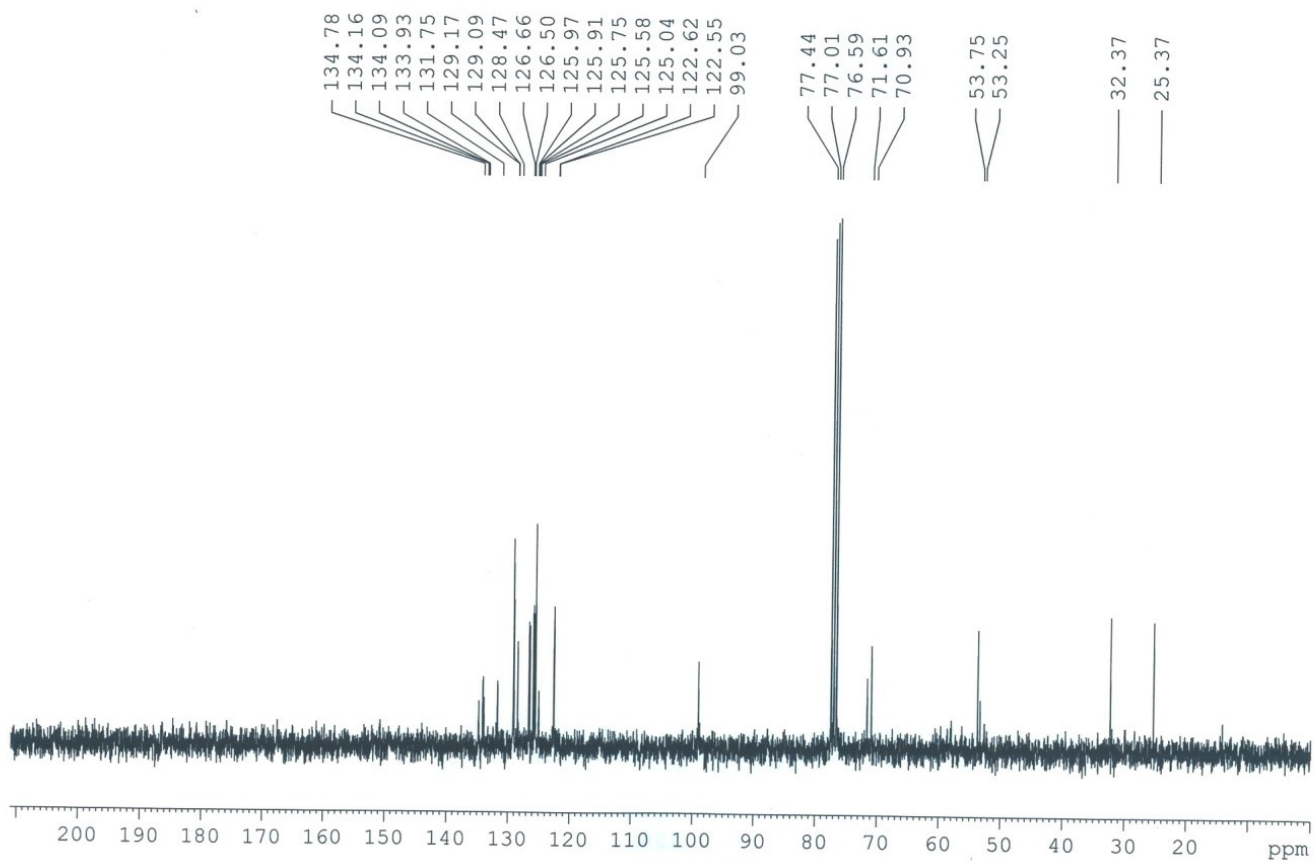

SI Figure 11:  $^1\text{H}$  and  $^{13}\text{C}$ -NMR spectra of compound 6j

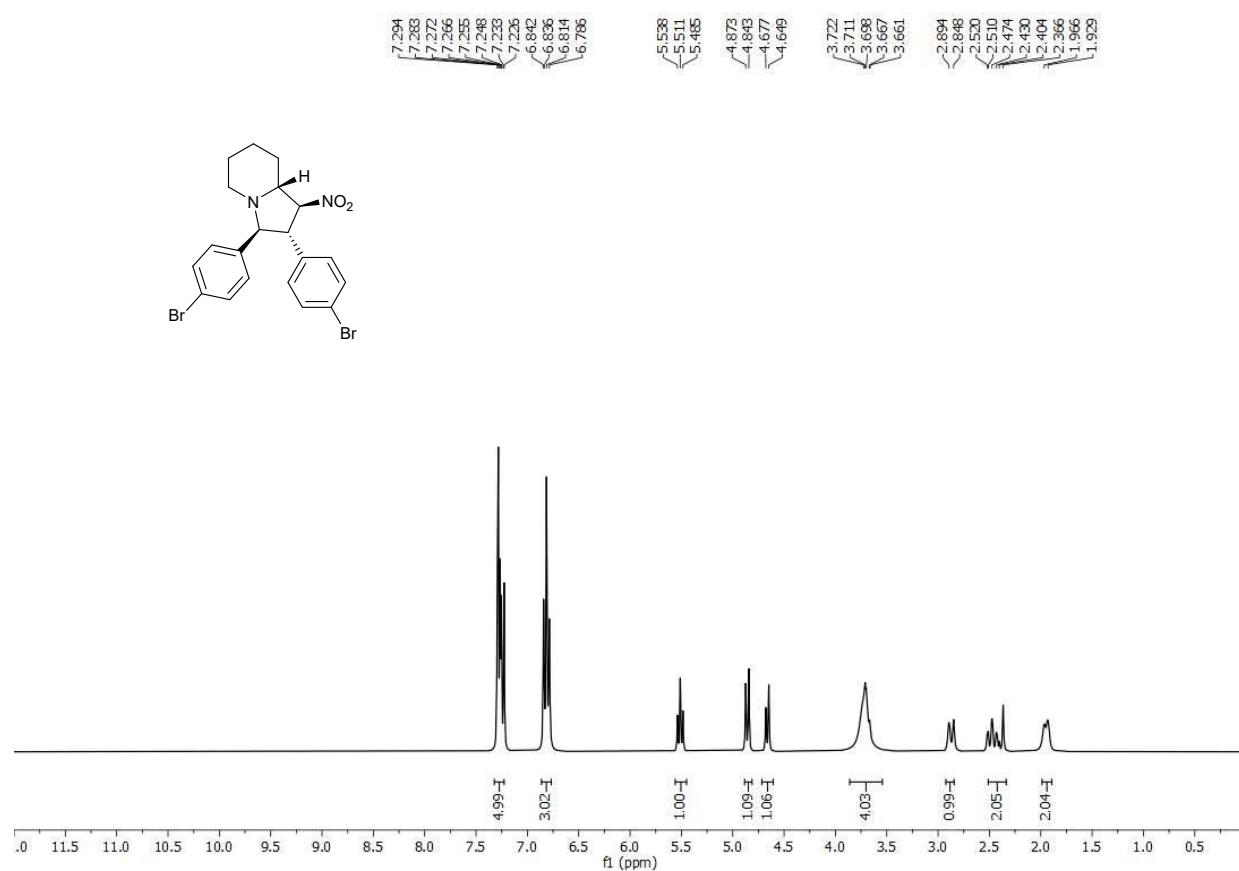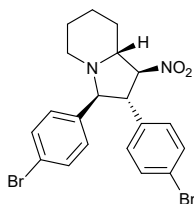

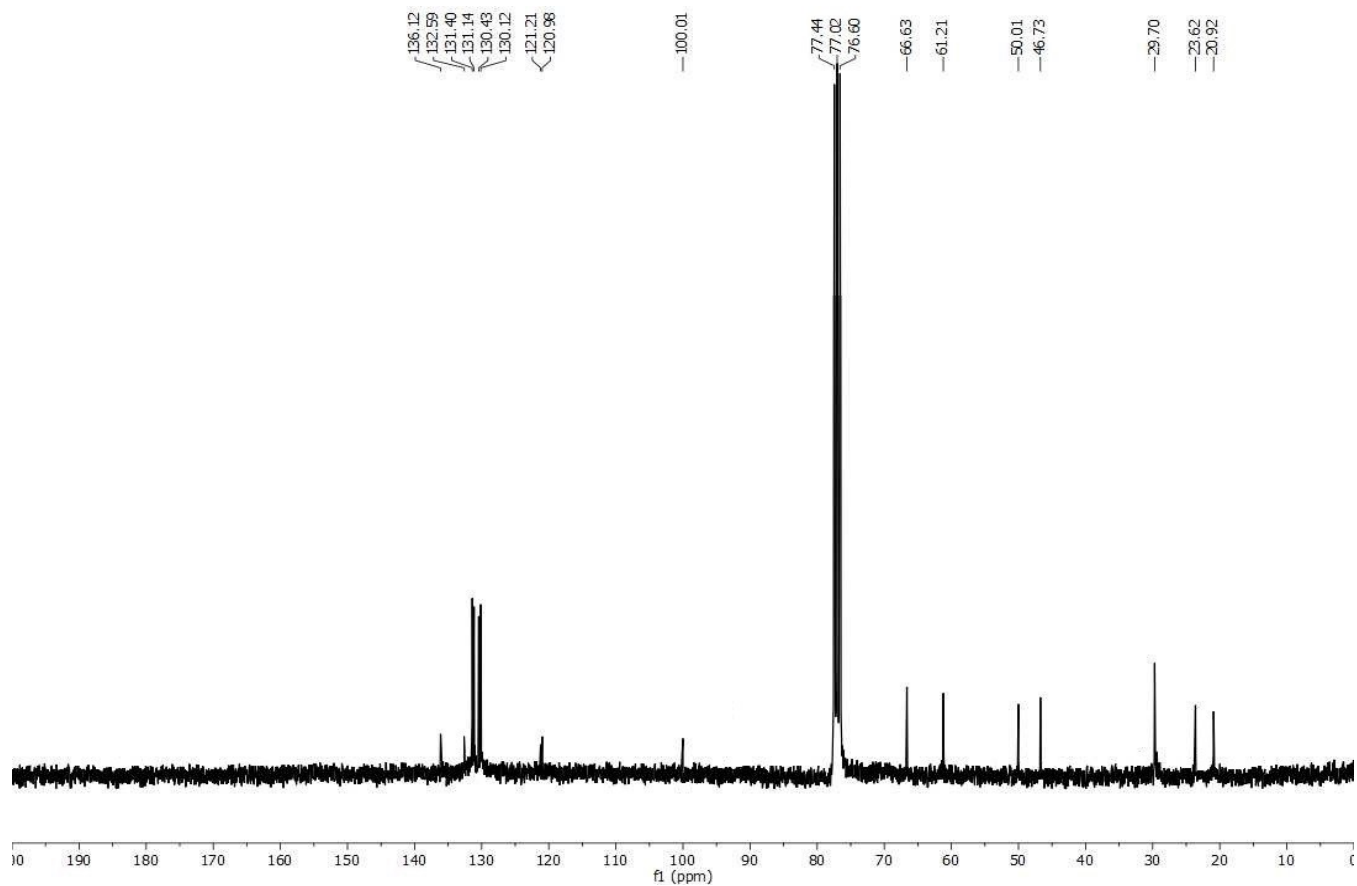

SI Figure 12:  $^1\text{H}$  and  $^{13}\text{C}$ -NMR spectra of compound 7a

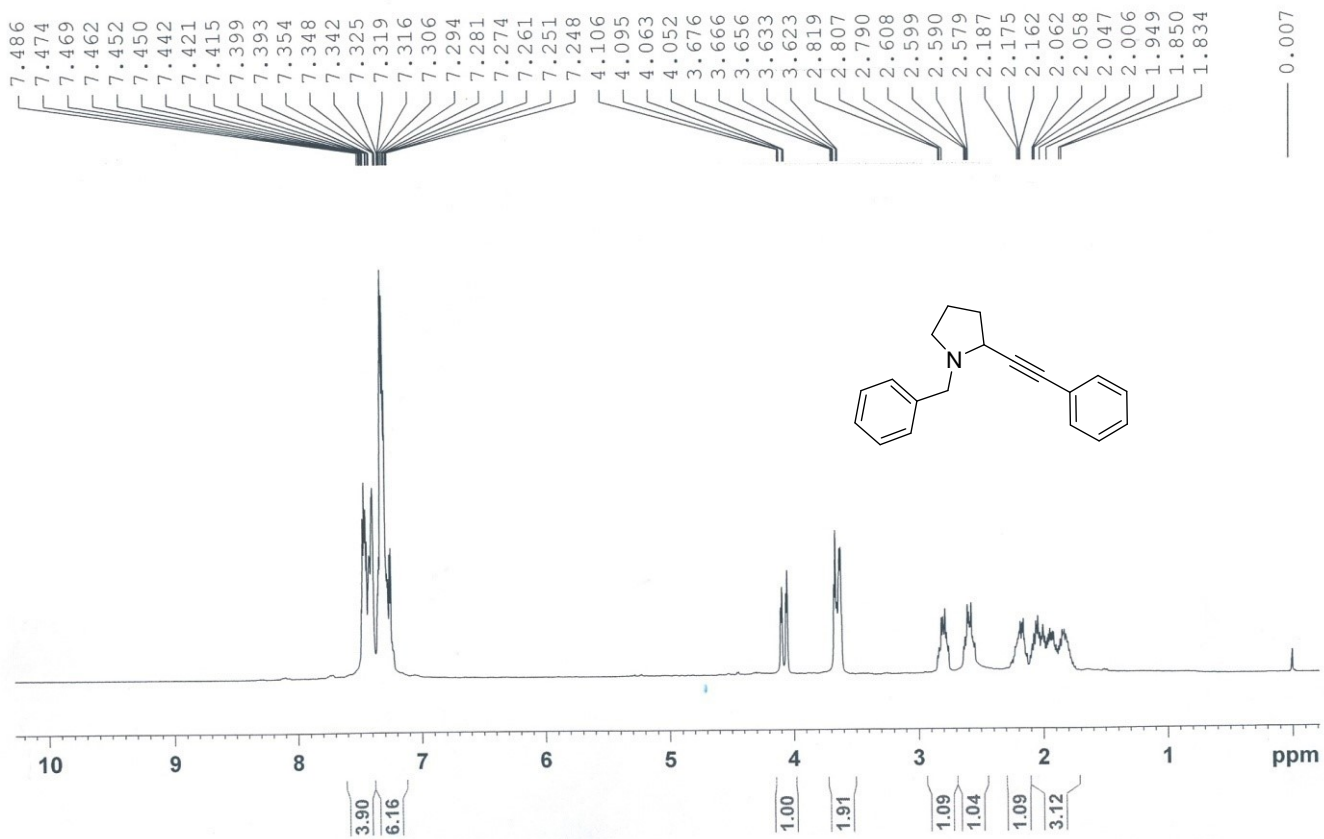

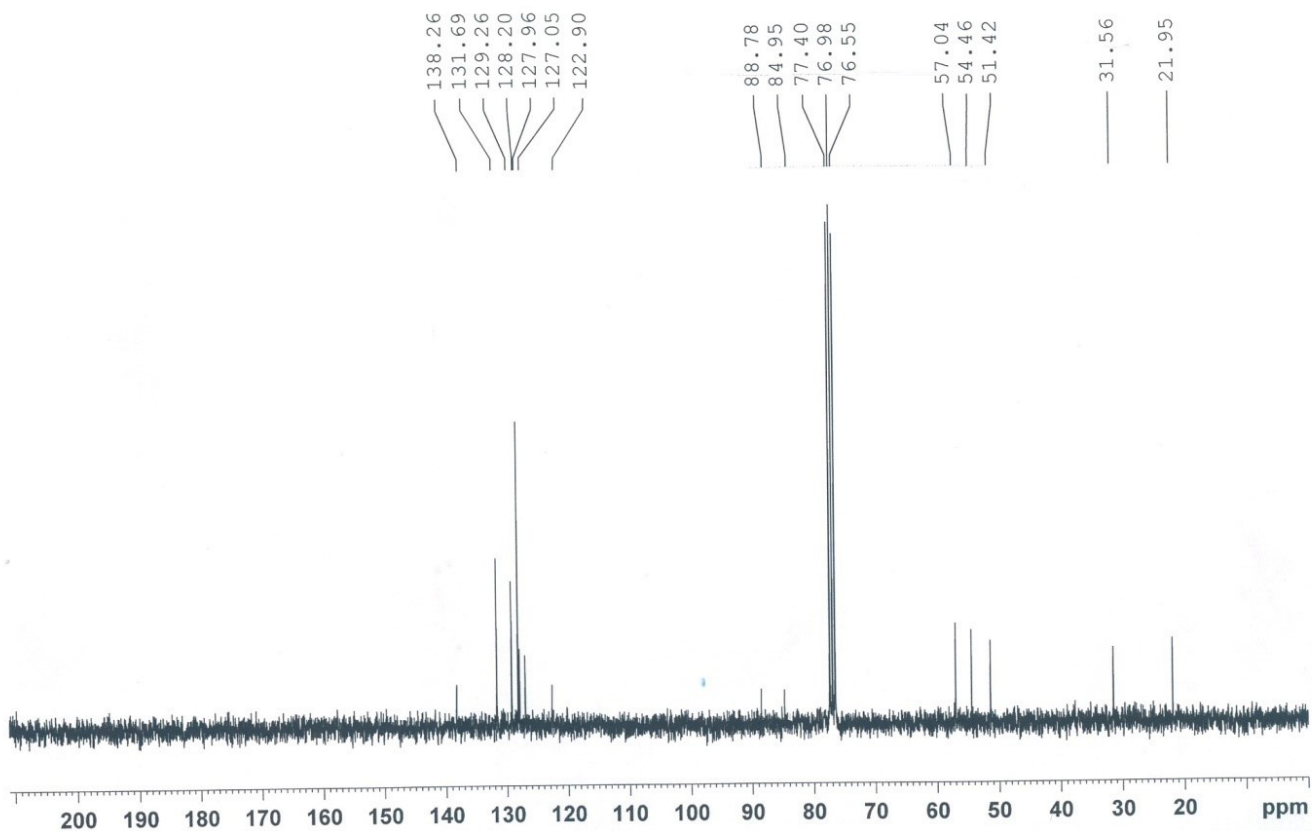

SI Figure 13: <sup>1</sup>H and <sup>13</sup>C-NMR spectra of compound 7b

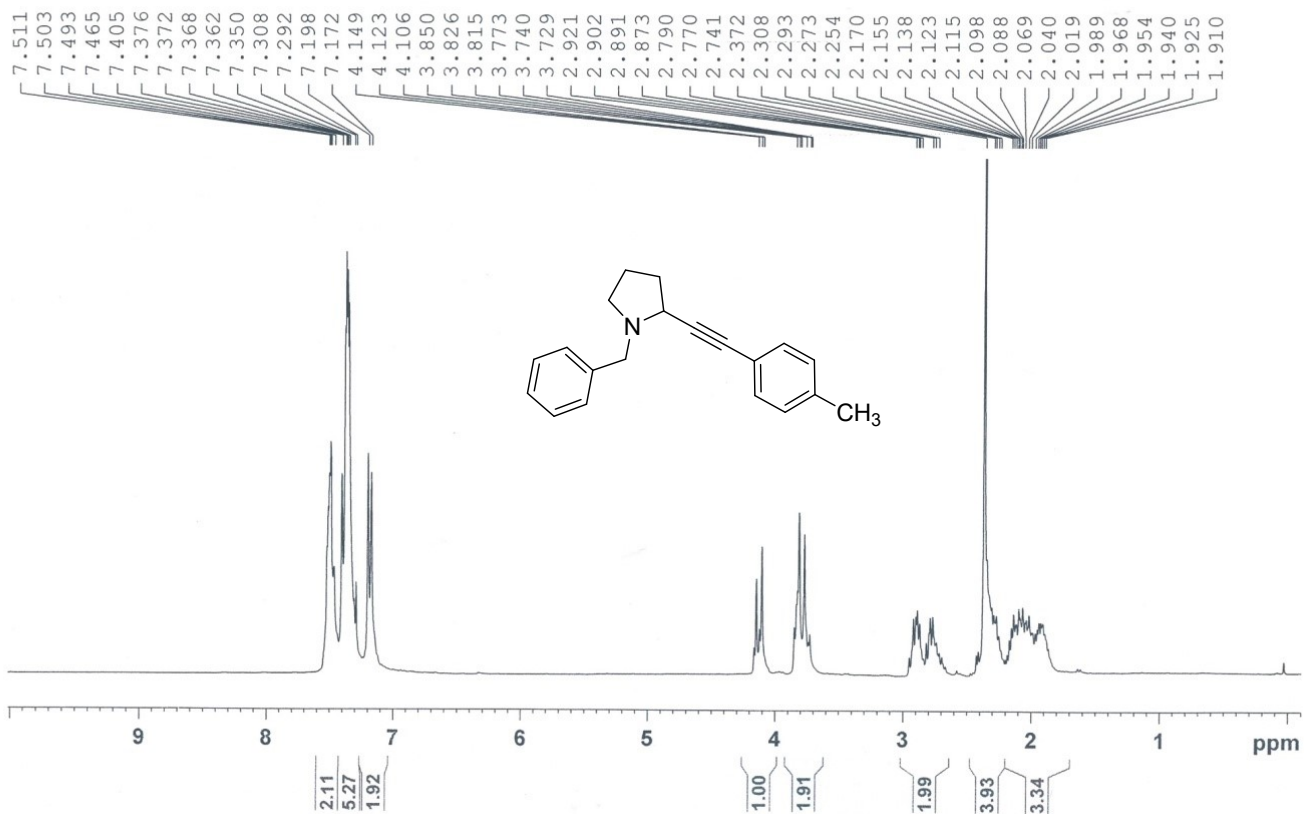

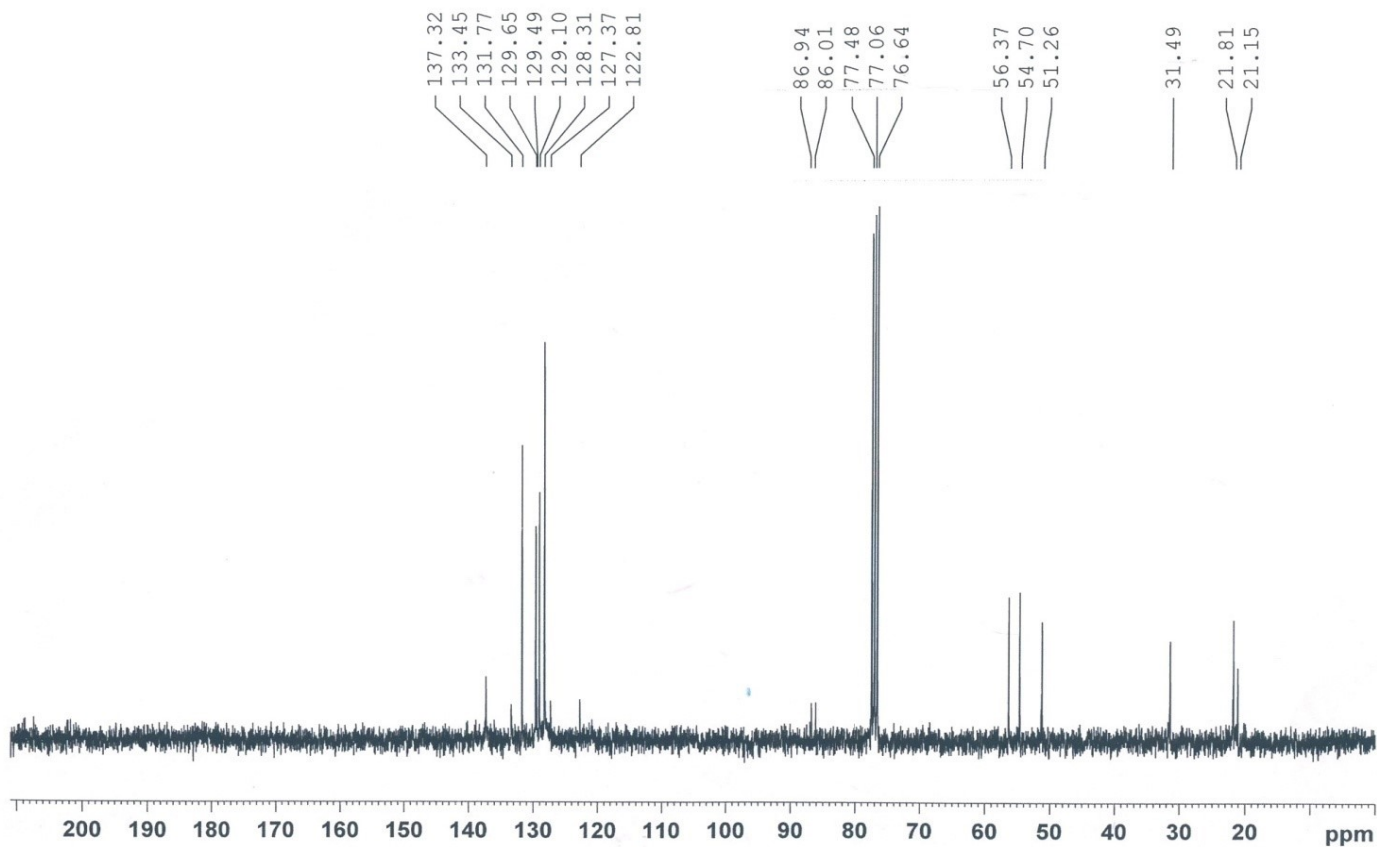

SI Figure 14:  $^1\text{H}$  and  $^{13}\text{C}$ -NMR spectra of compound 7c

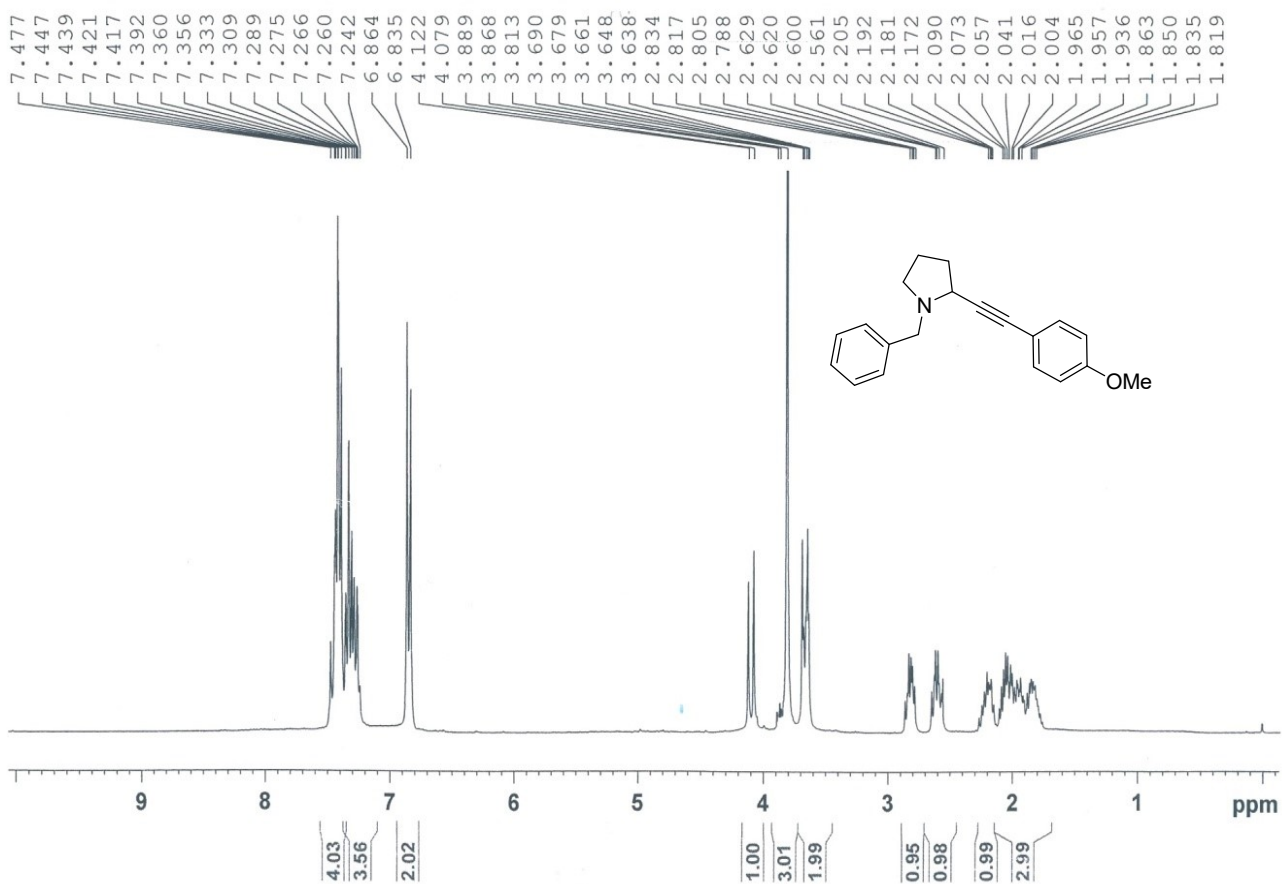

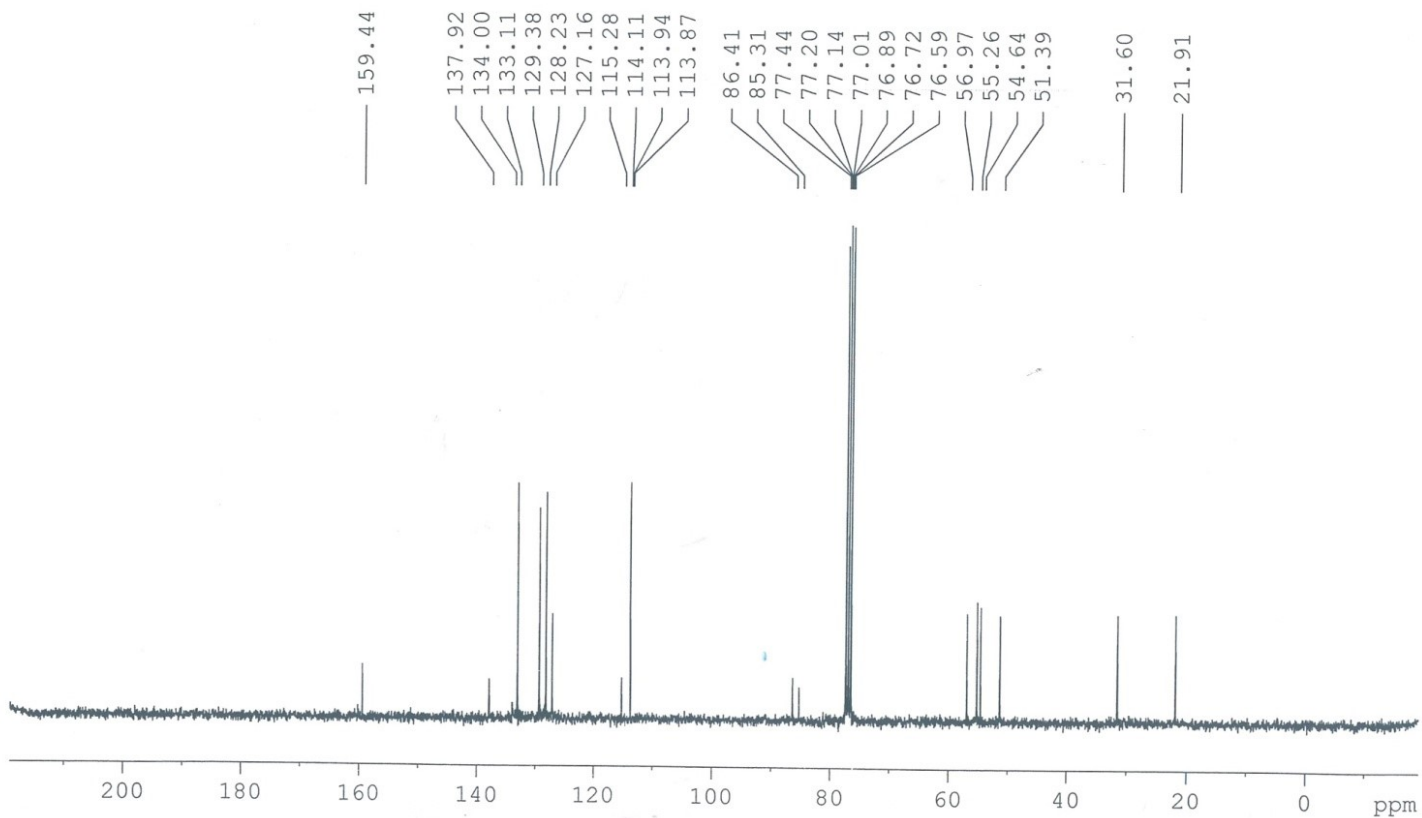

SI Figure 15:  $^1\text{H}$  and  $^{13}\text{C}$ -NMR spectra of compound **7d**

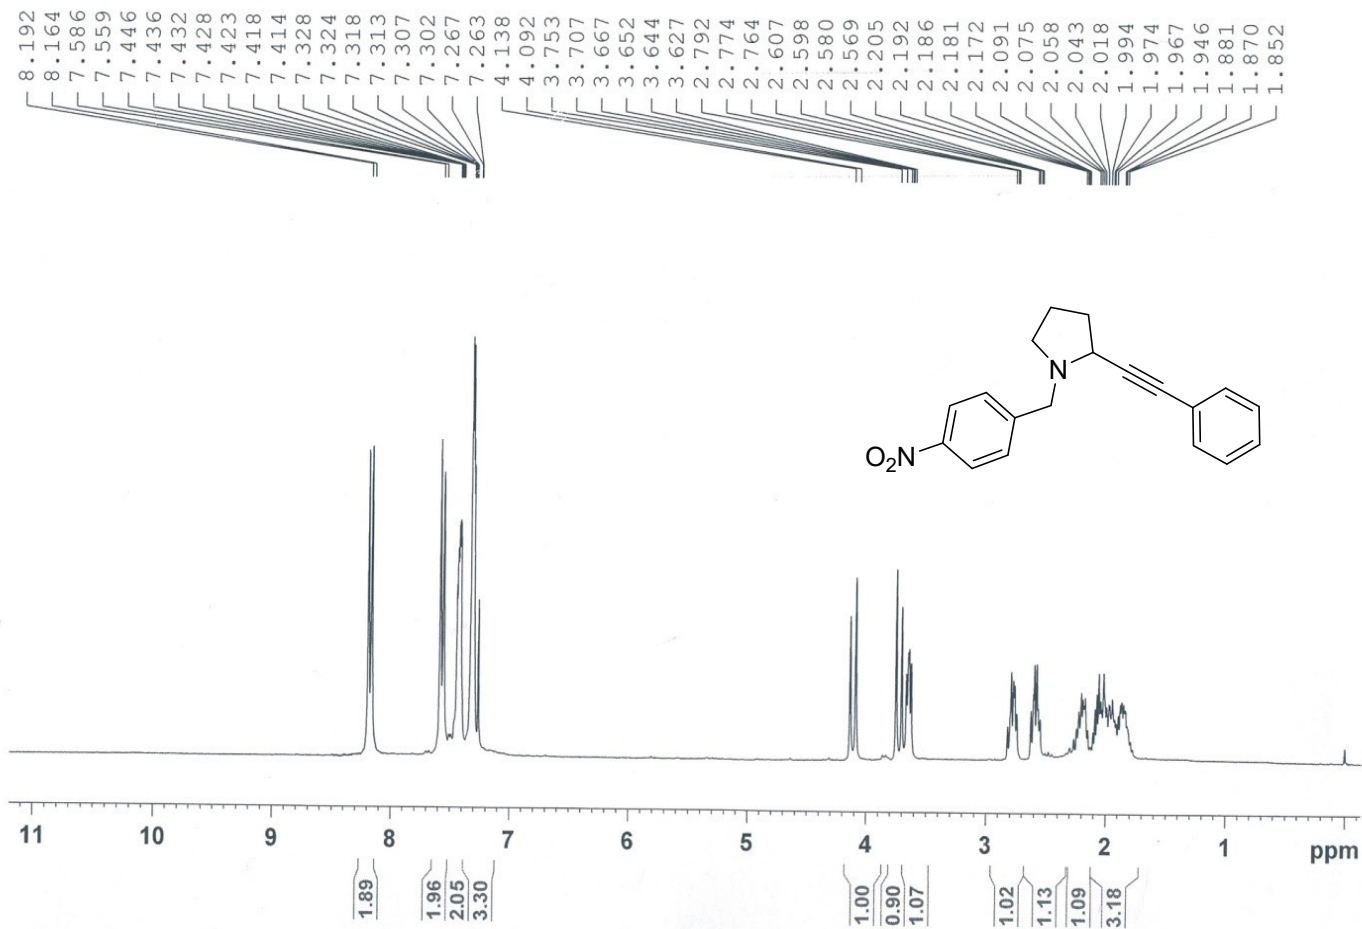

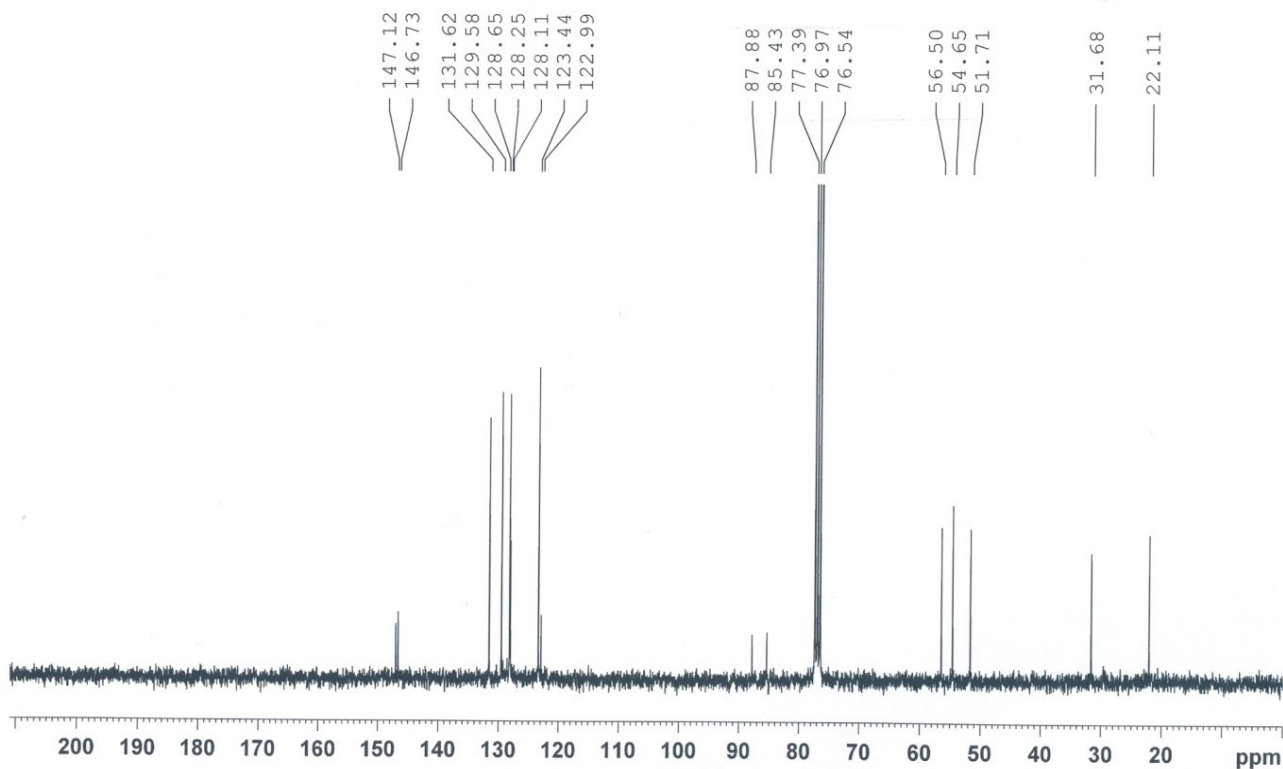

SI Figure 16:  $^1\text{H}$ ,  $^{13}\text{C}$  and  $^{19}\text{F}$ -NMR spectra of compound **7e**

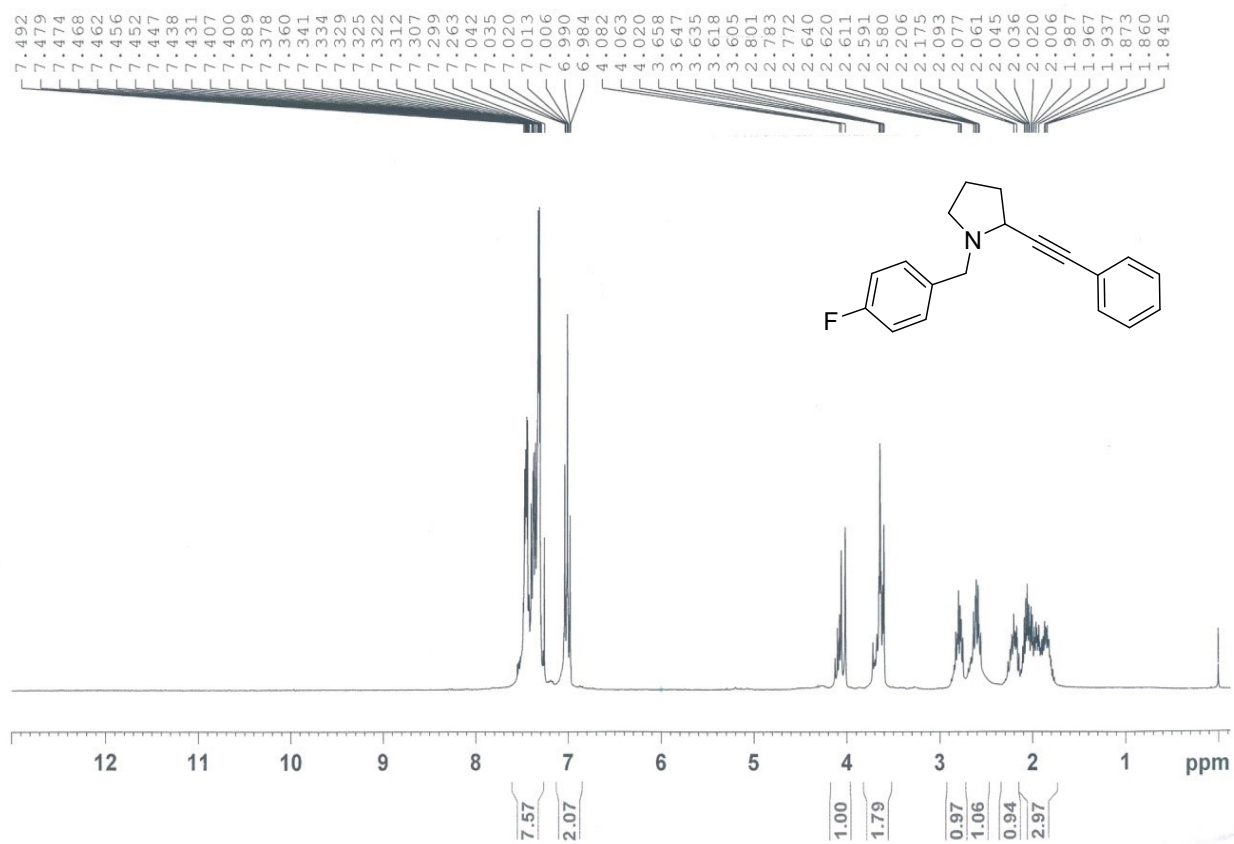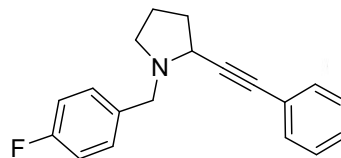



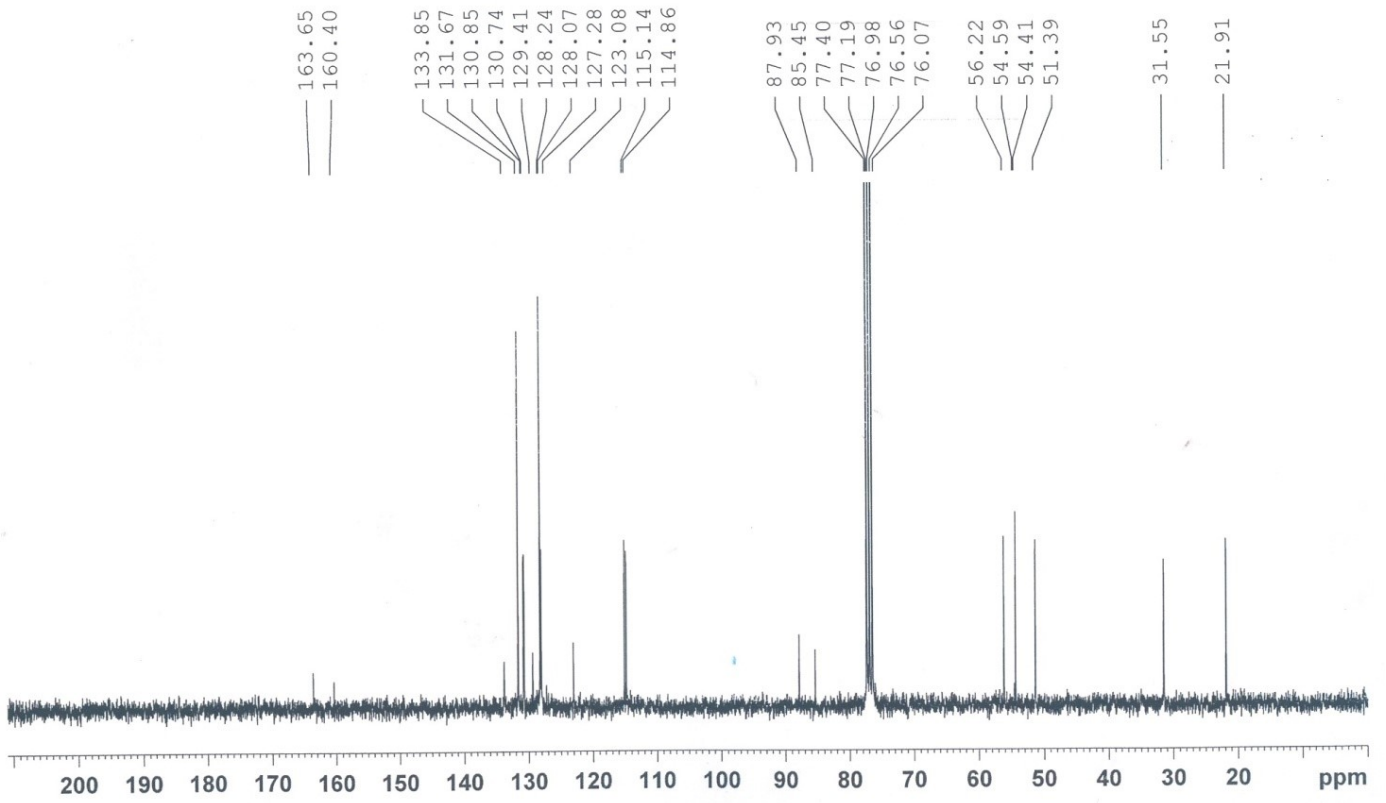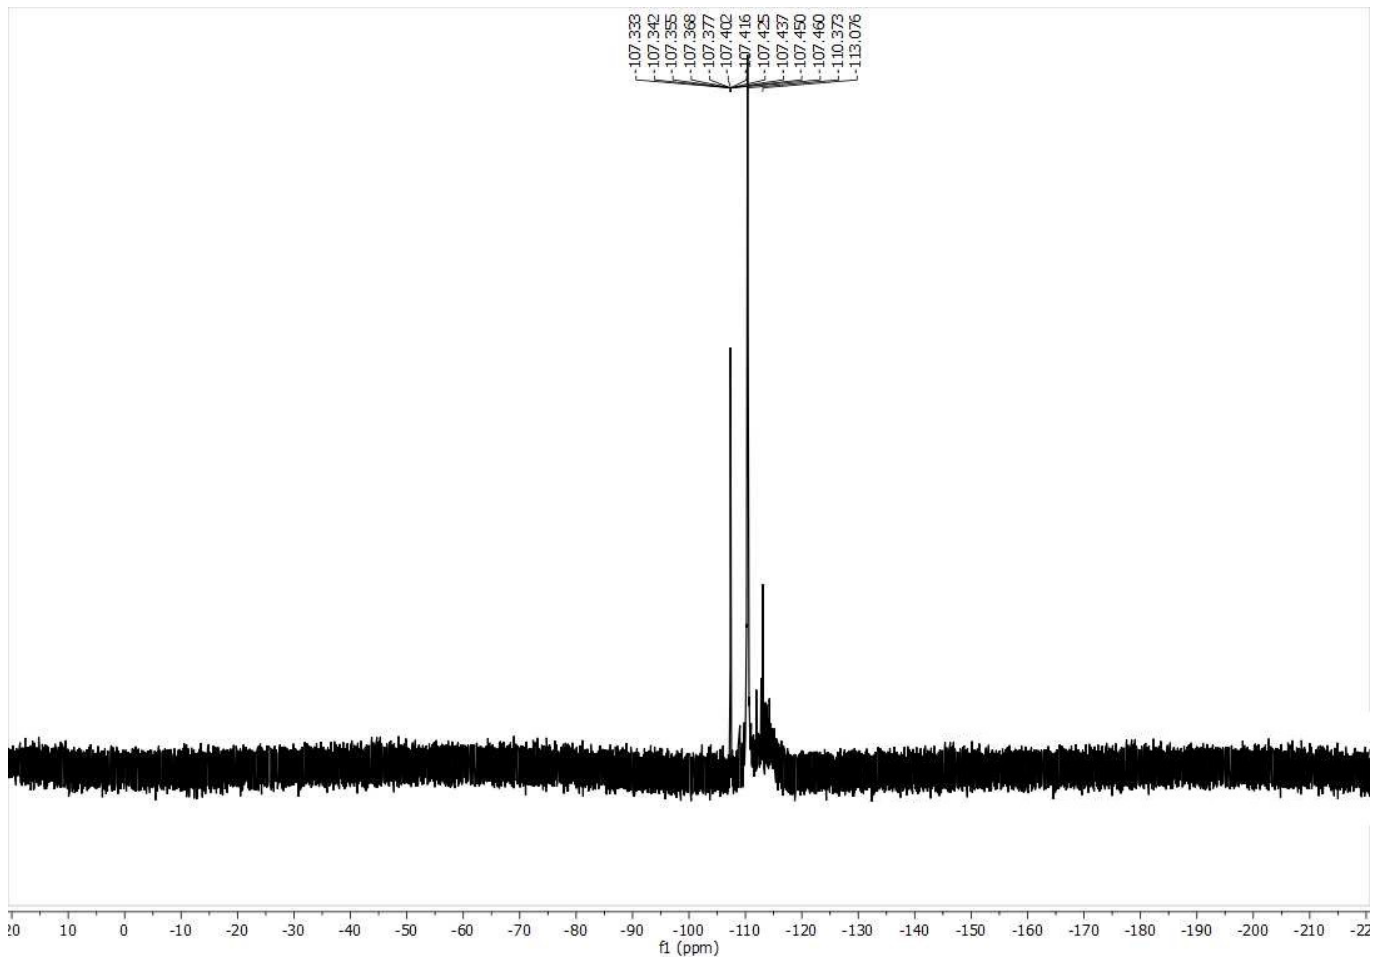

SI Figure 17:  $^1\text{H}$  and  $^{13}\text{C}$ -NMR spectra of compound 7f

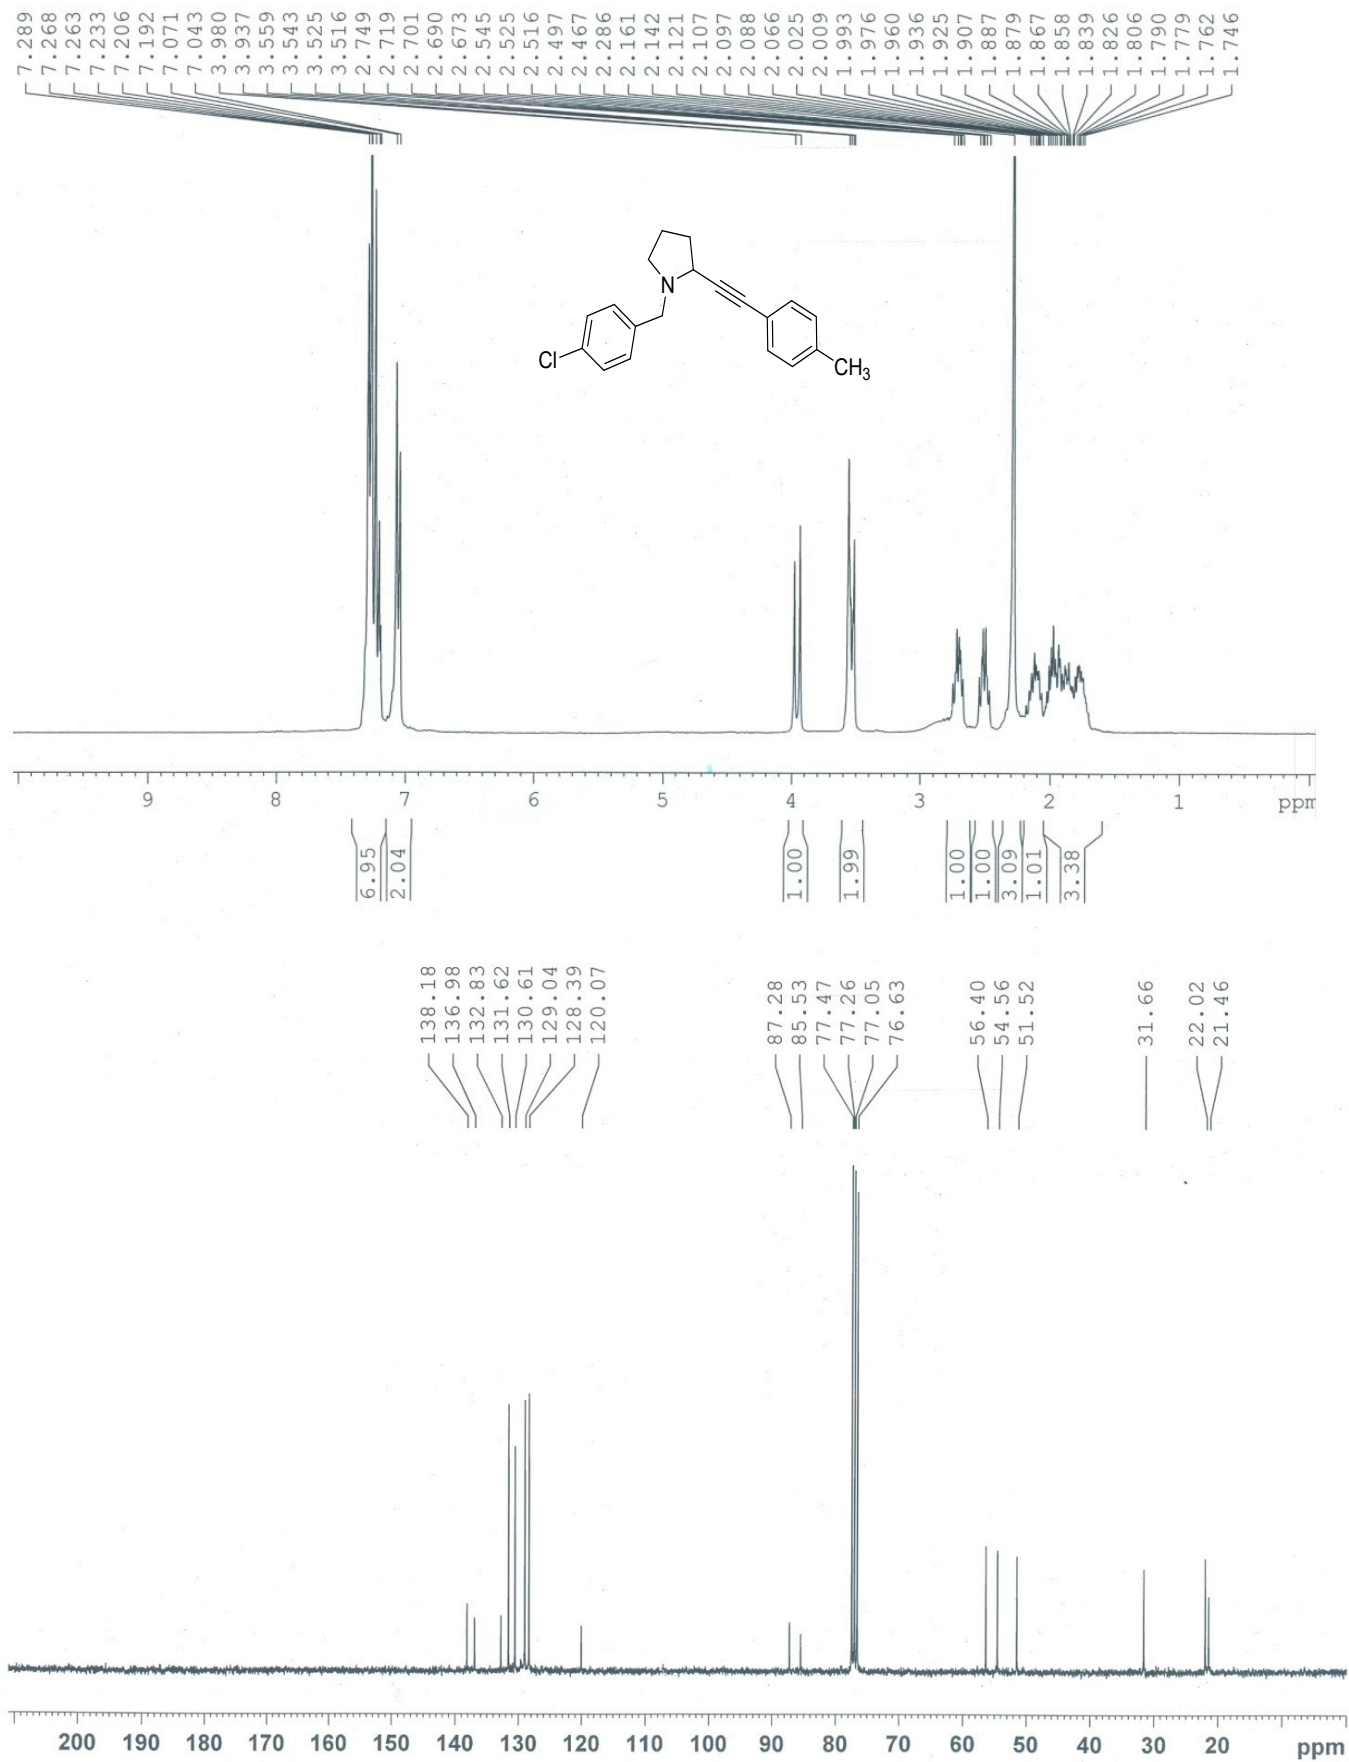



SI Figure 18:  $^1\text{H}$  and  $^{13}\text{C}$ -NMR spectra of compound 7g

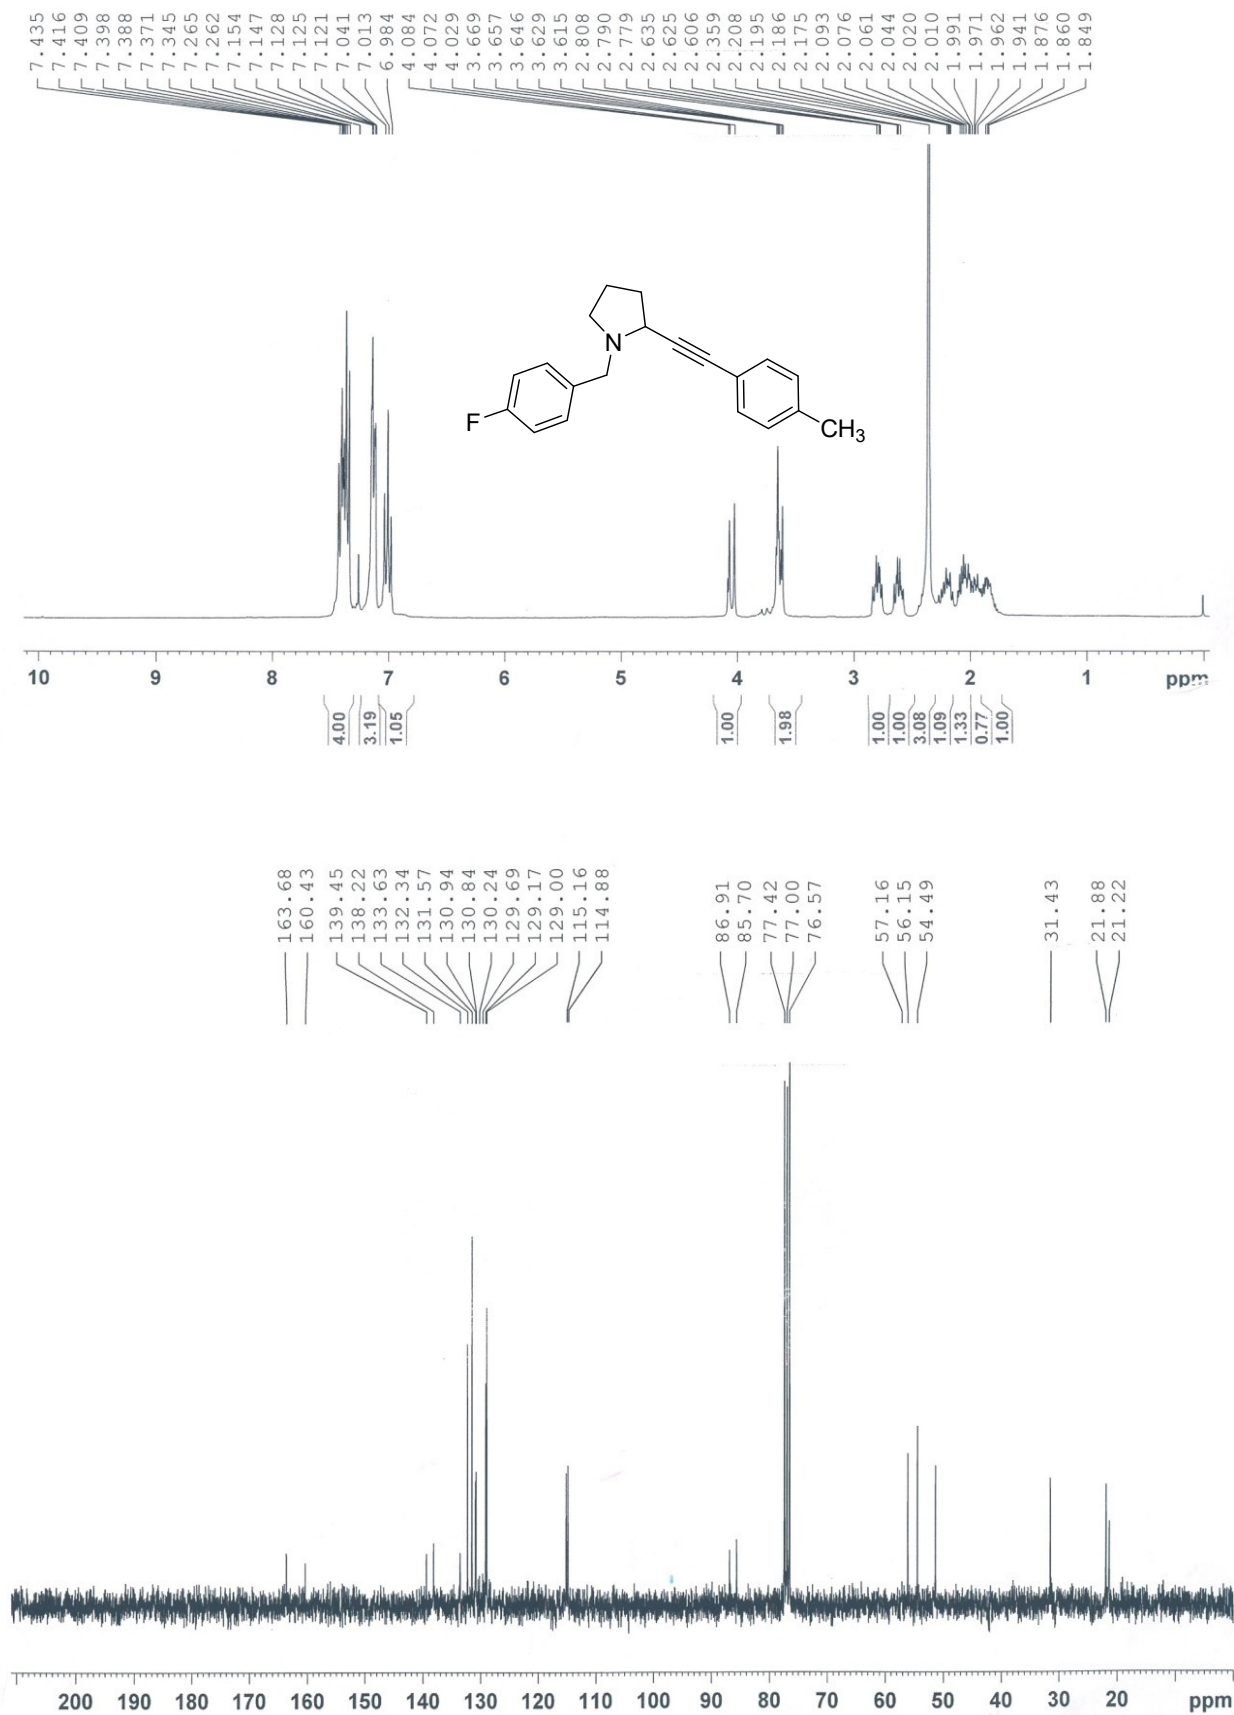

SI Figure 19:  $^1\text{H}$  and  $^{13}\text{C}$ -NMR spectra of compound **7h**

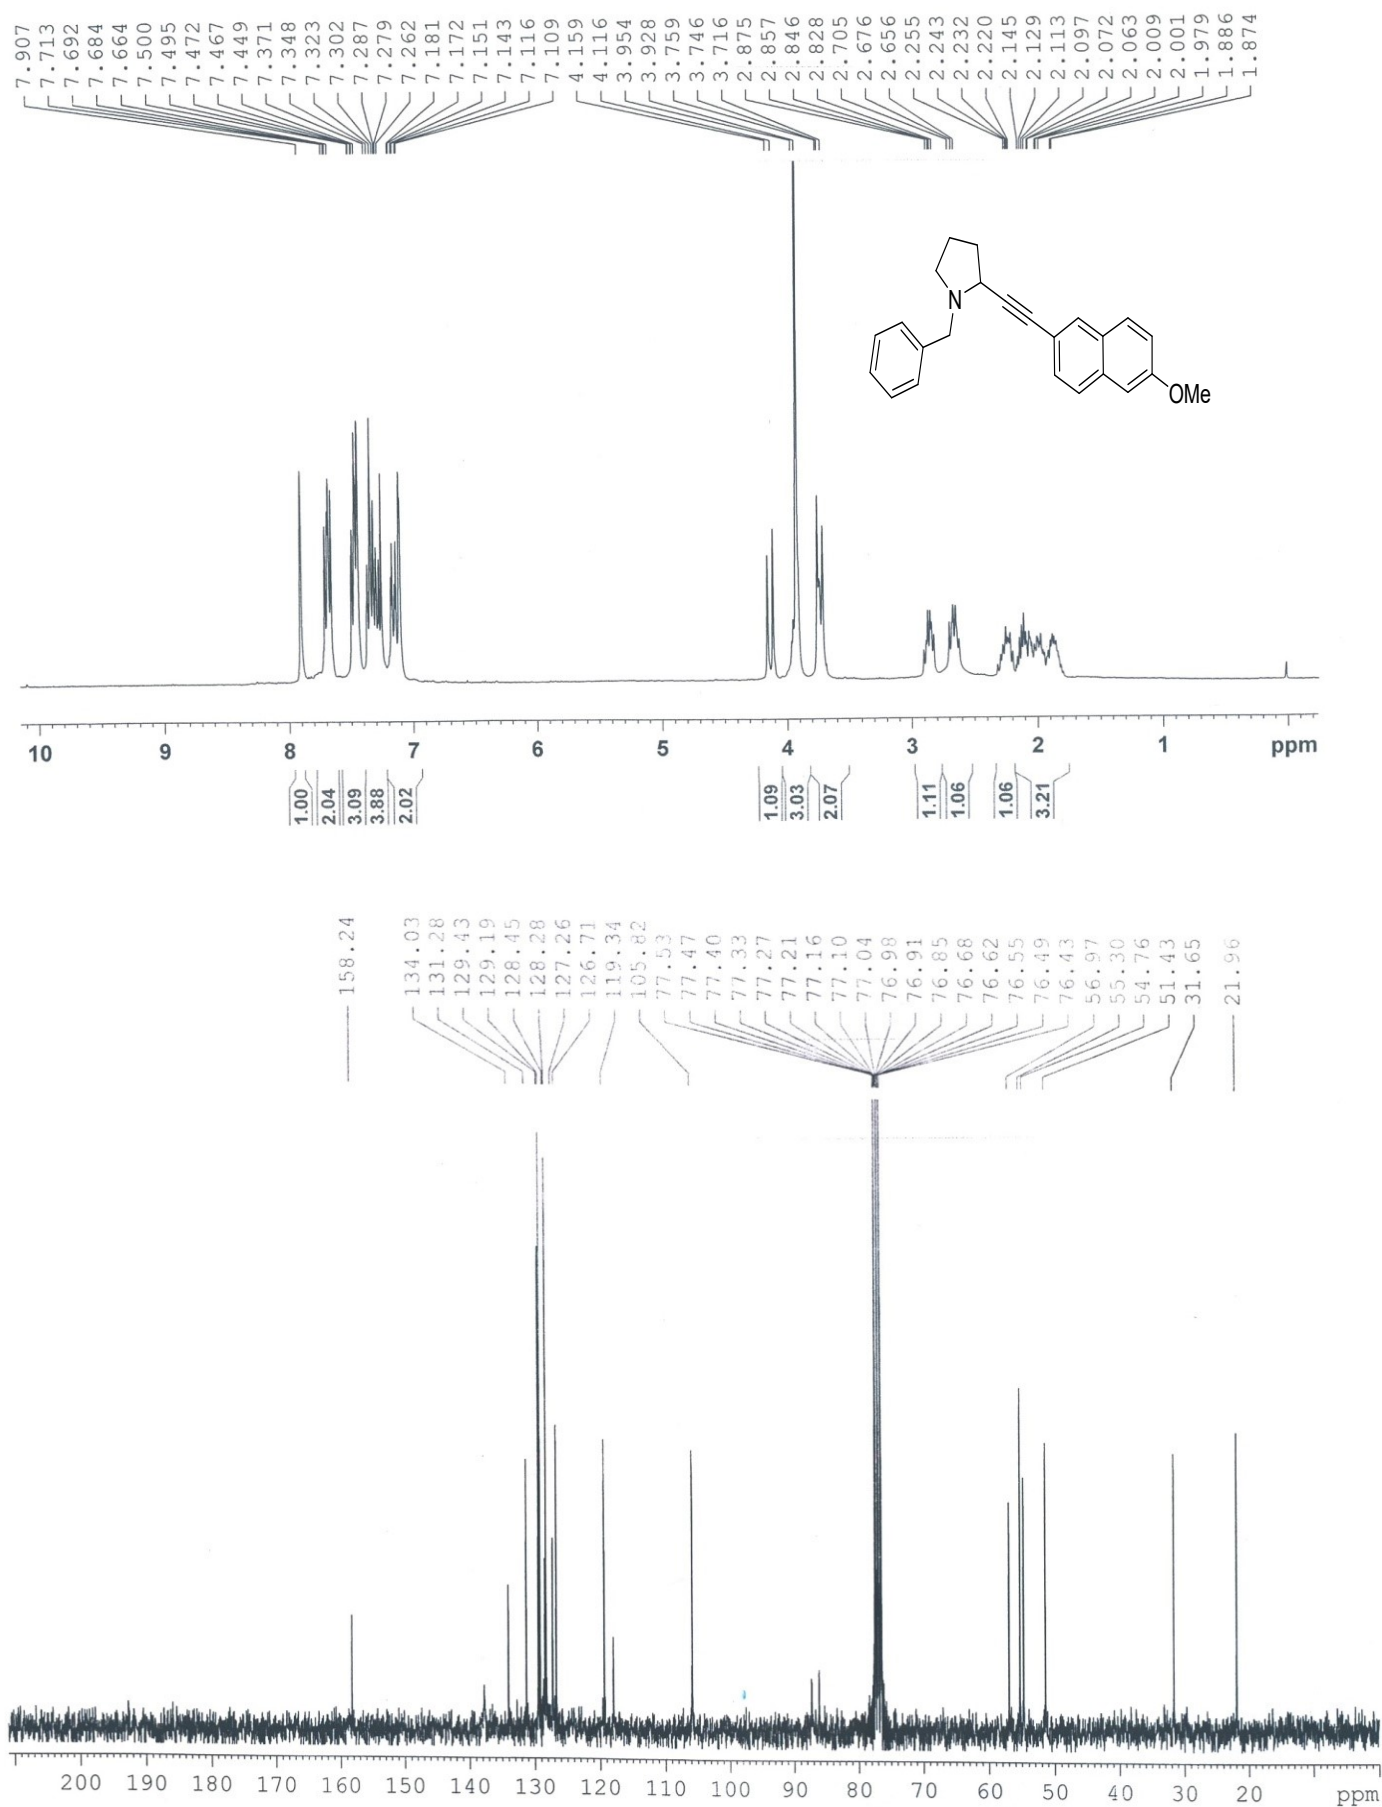

SI Figure 20:  $^1\text{H}$  and  $^{13}\text{C}$ -NMR spectra of compound 7i

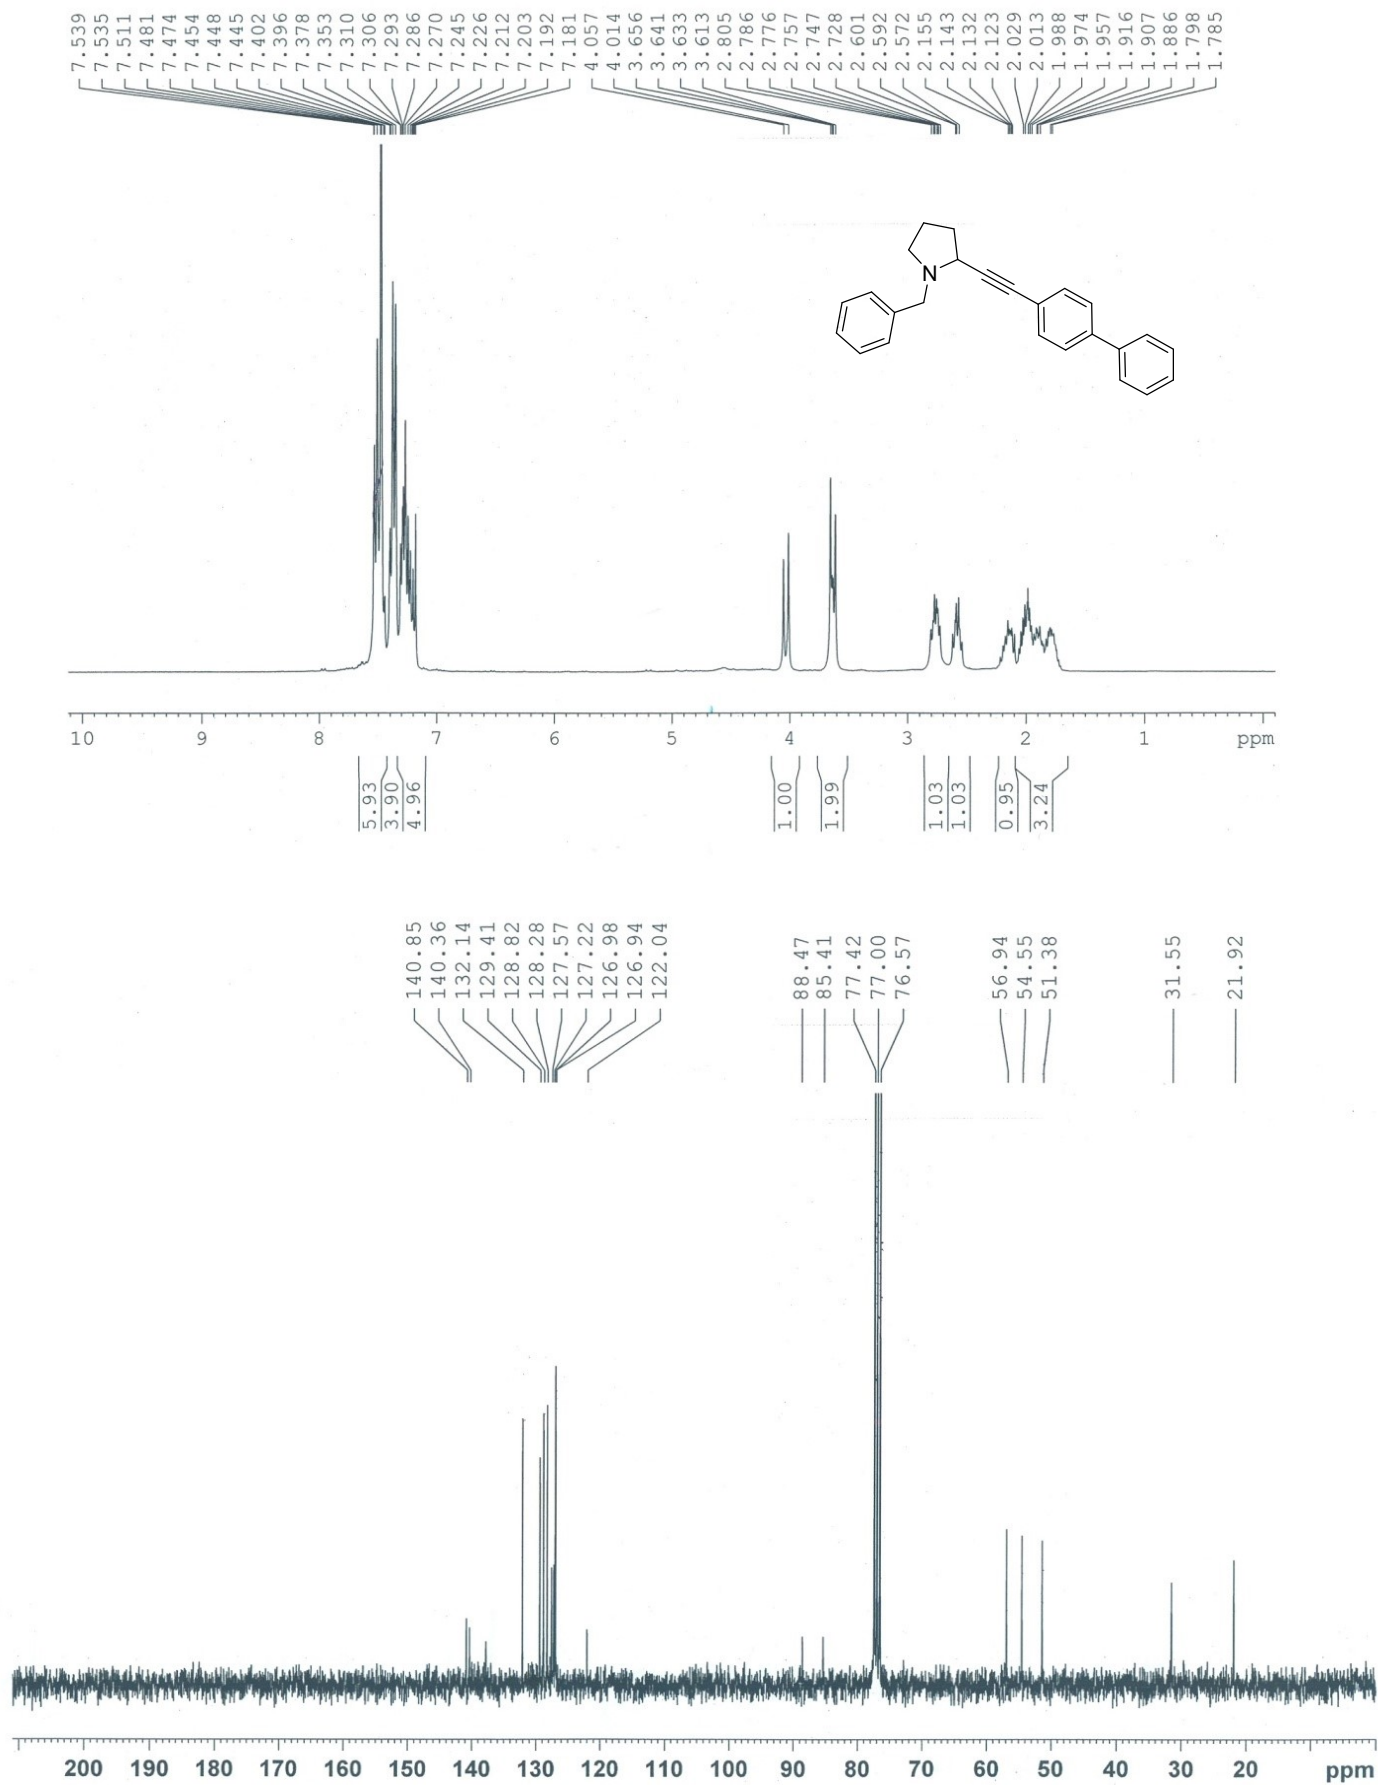

SI Figure 21:  $^1\text{H}$  and  $^{13}\text{C}$ -NMR spectra of compound 7j

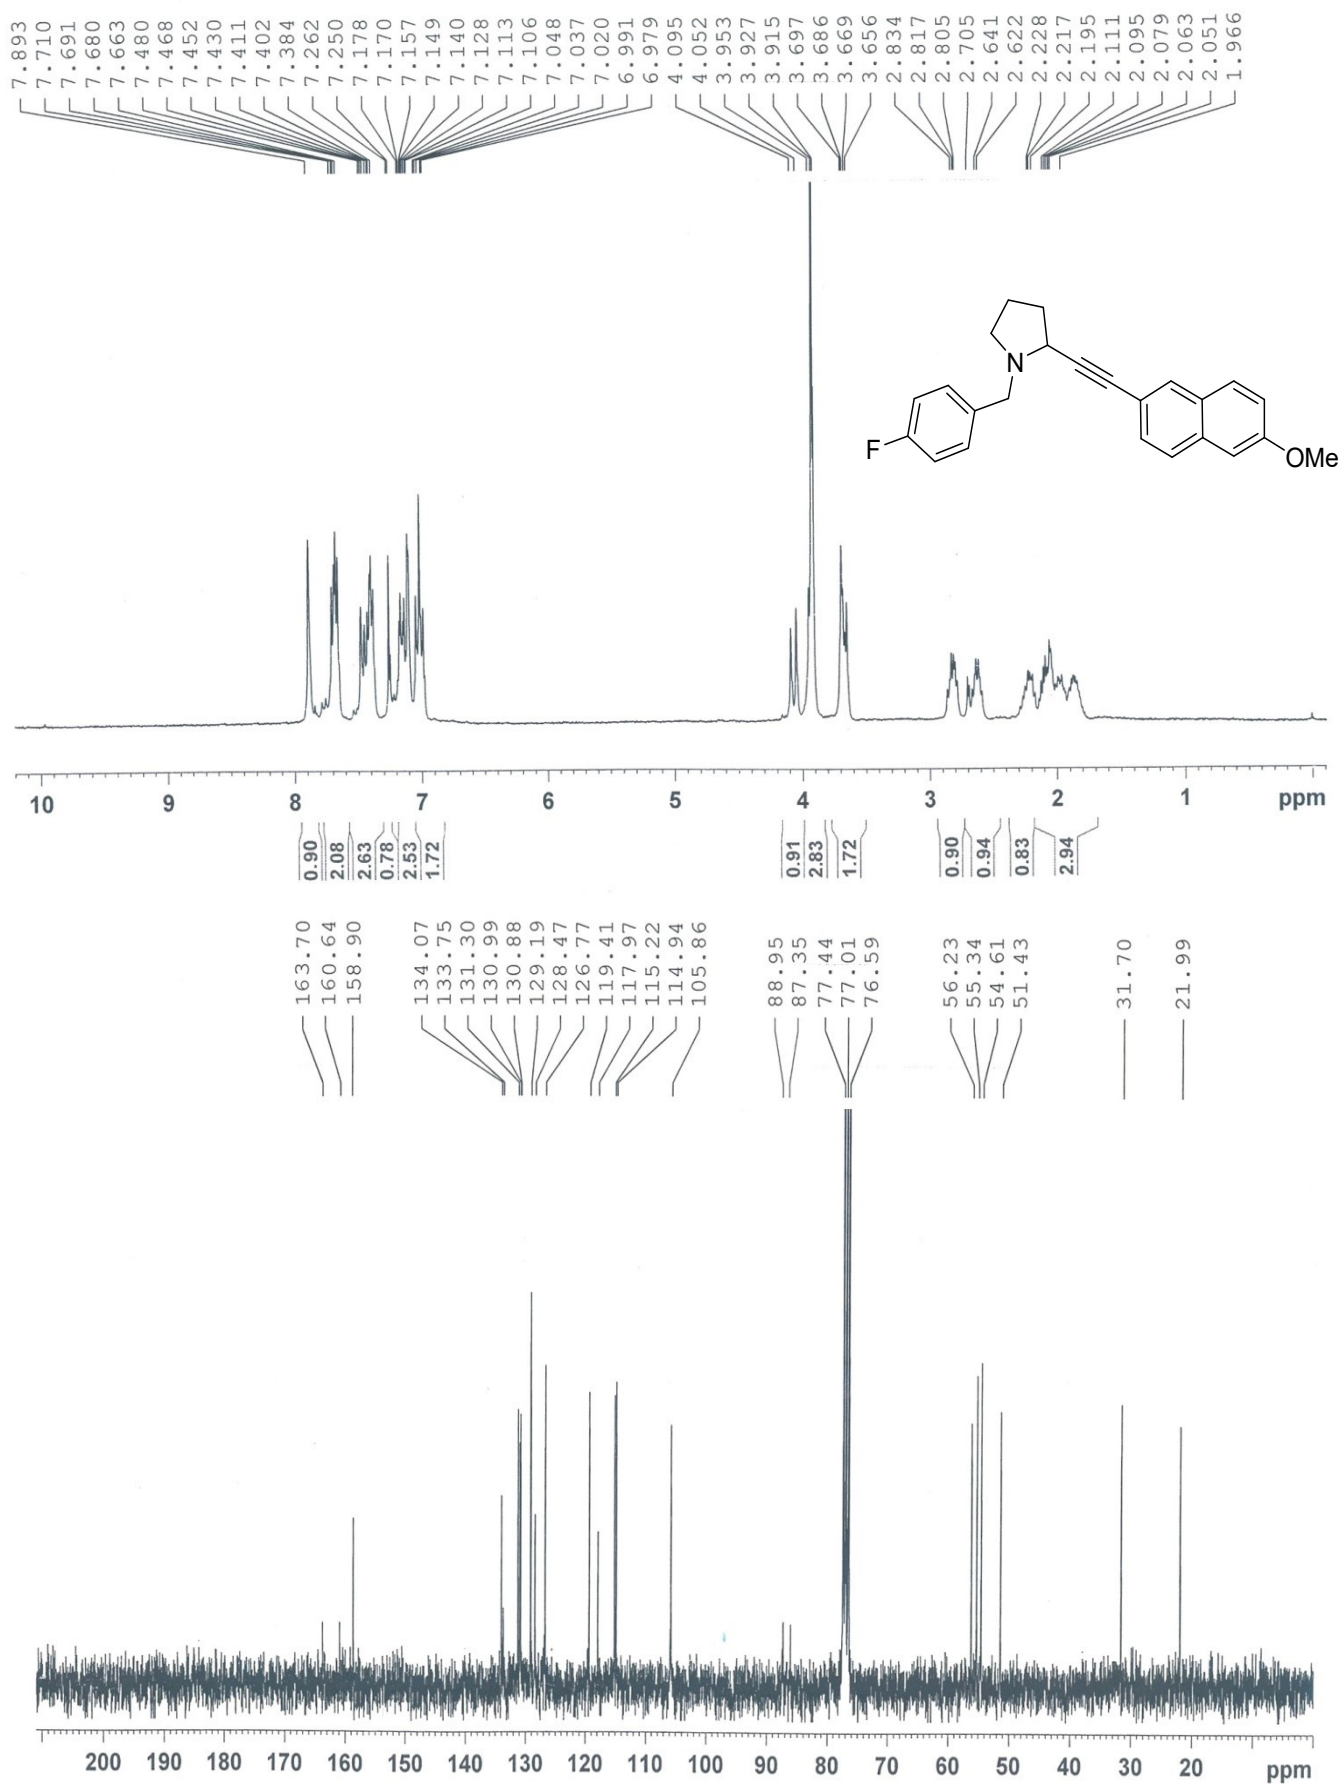

SI Figure 22:  $^1\text{H}$  and  $^{13}\text{C}$ -NMR spectra of compound 7k

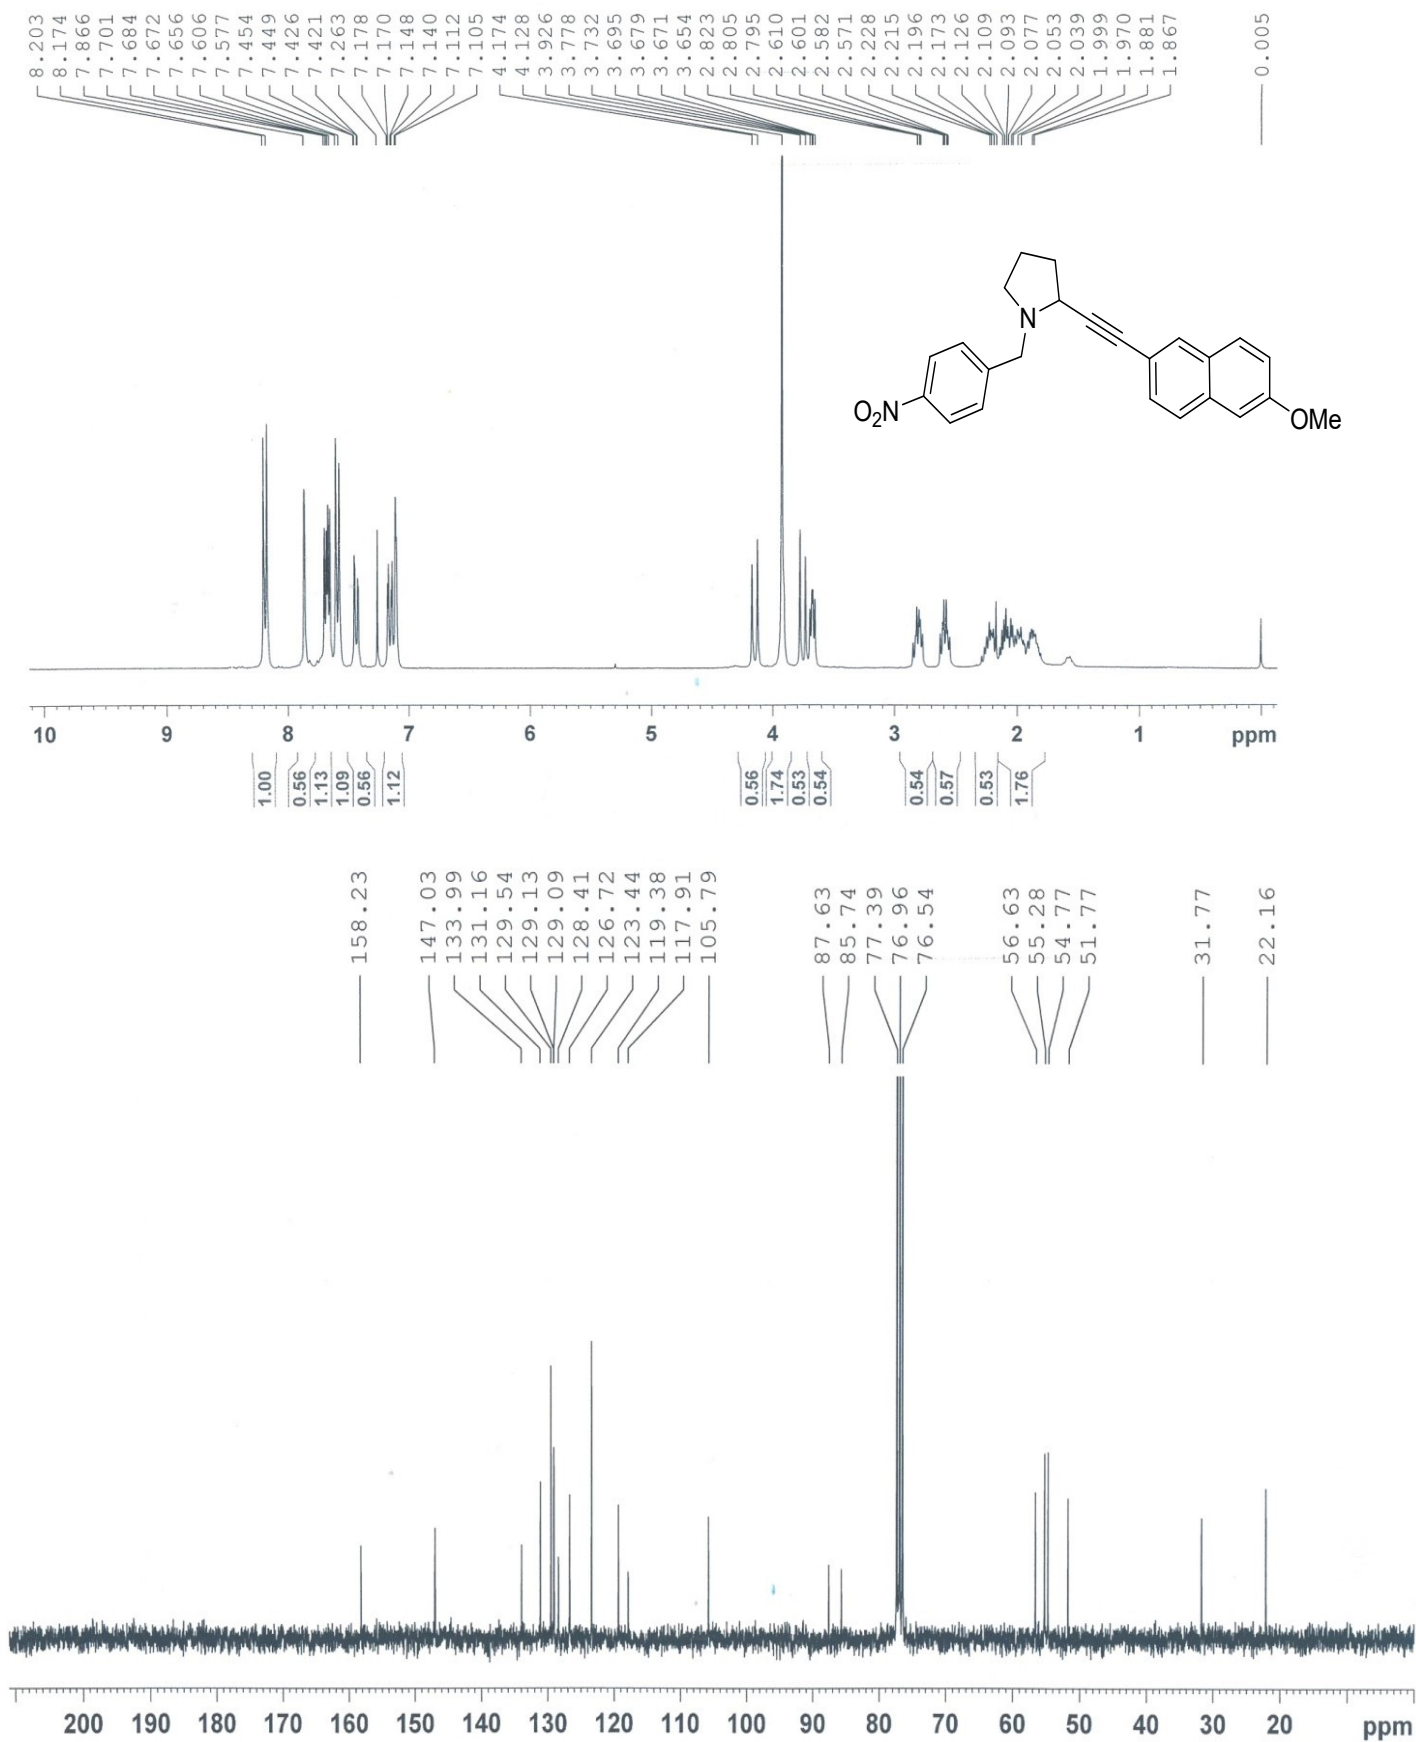



SI Figure 23:  $^1\text{H}$  and  $^{13}\text{C}$ -NMR spectra of compound 71

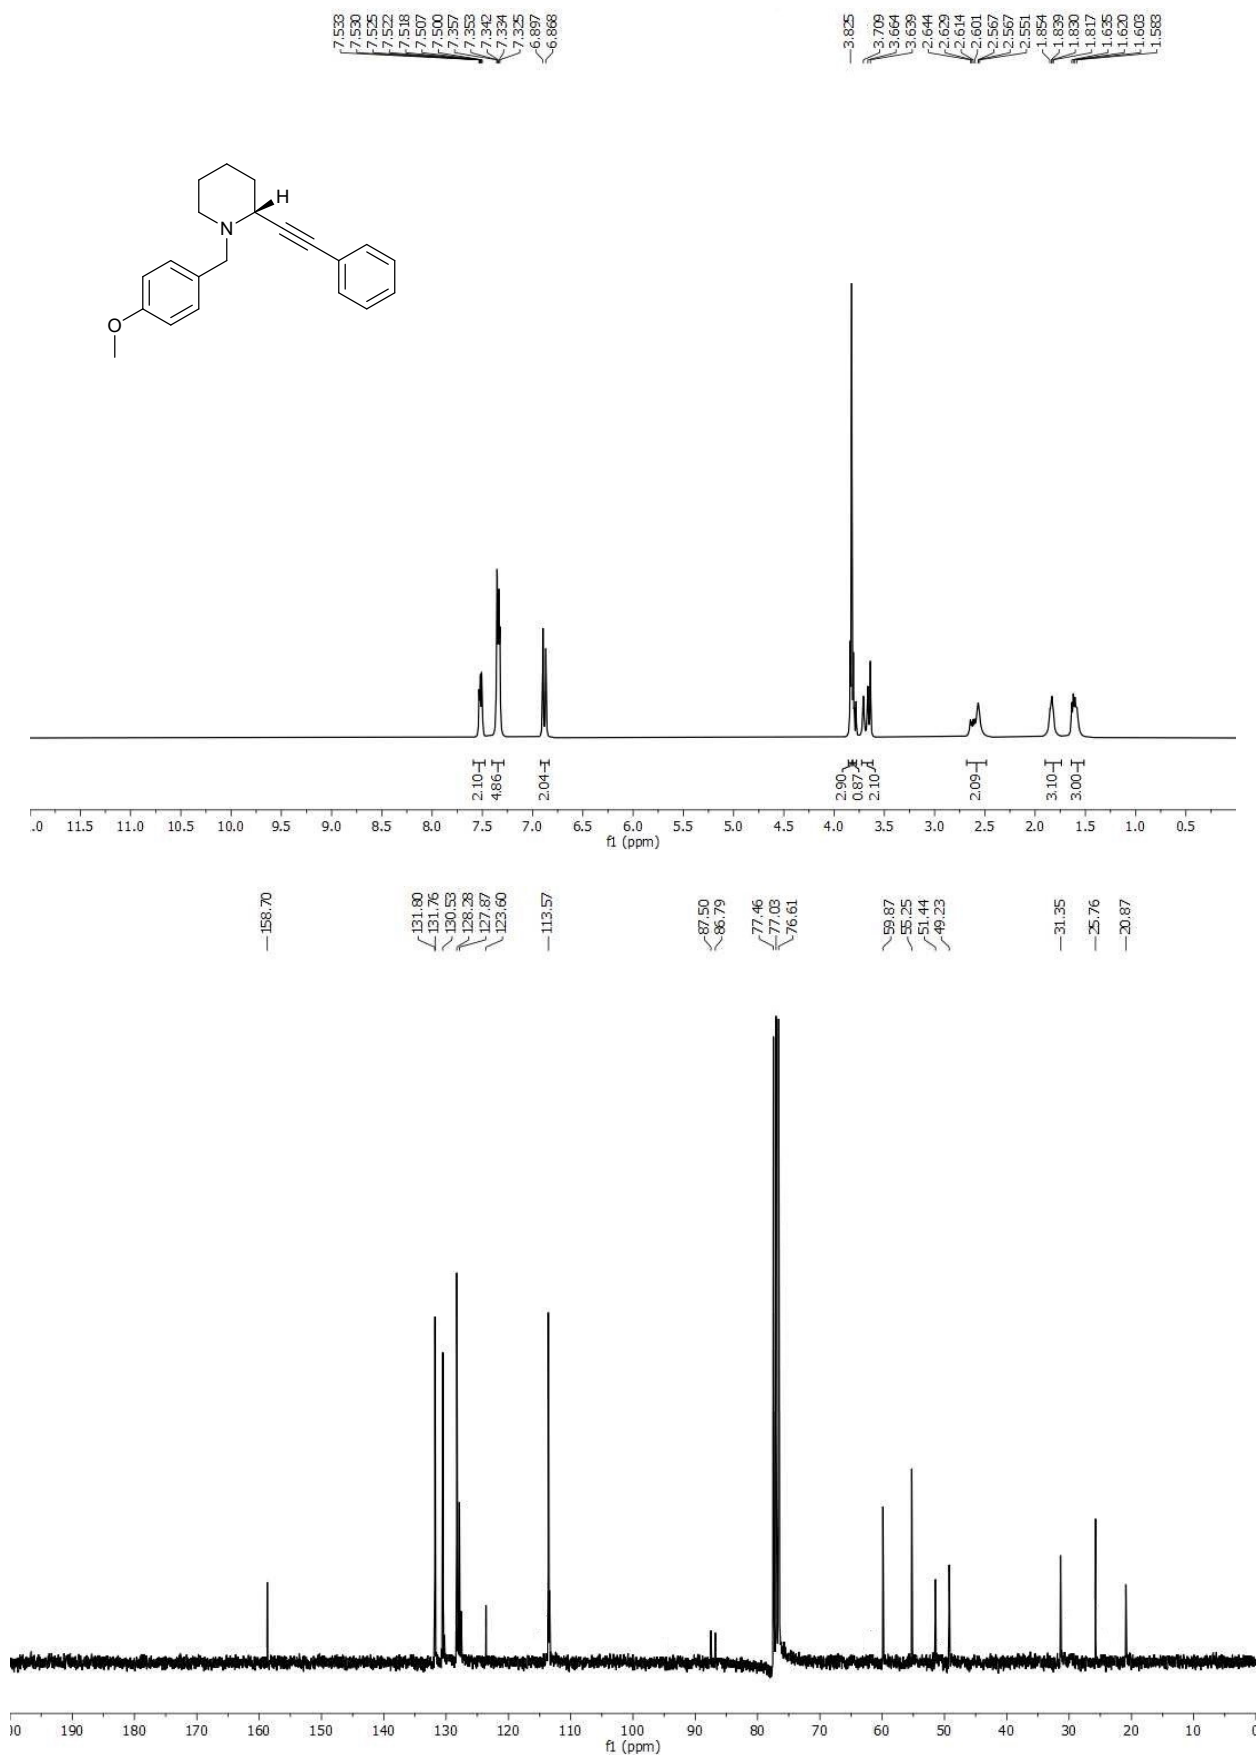

SI Figure 24:  $^1\text{H}$  and  $^{13}\text{C}$ -NMR spectra of compound **8a**

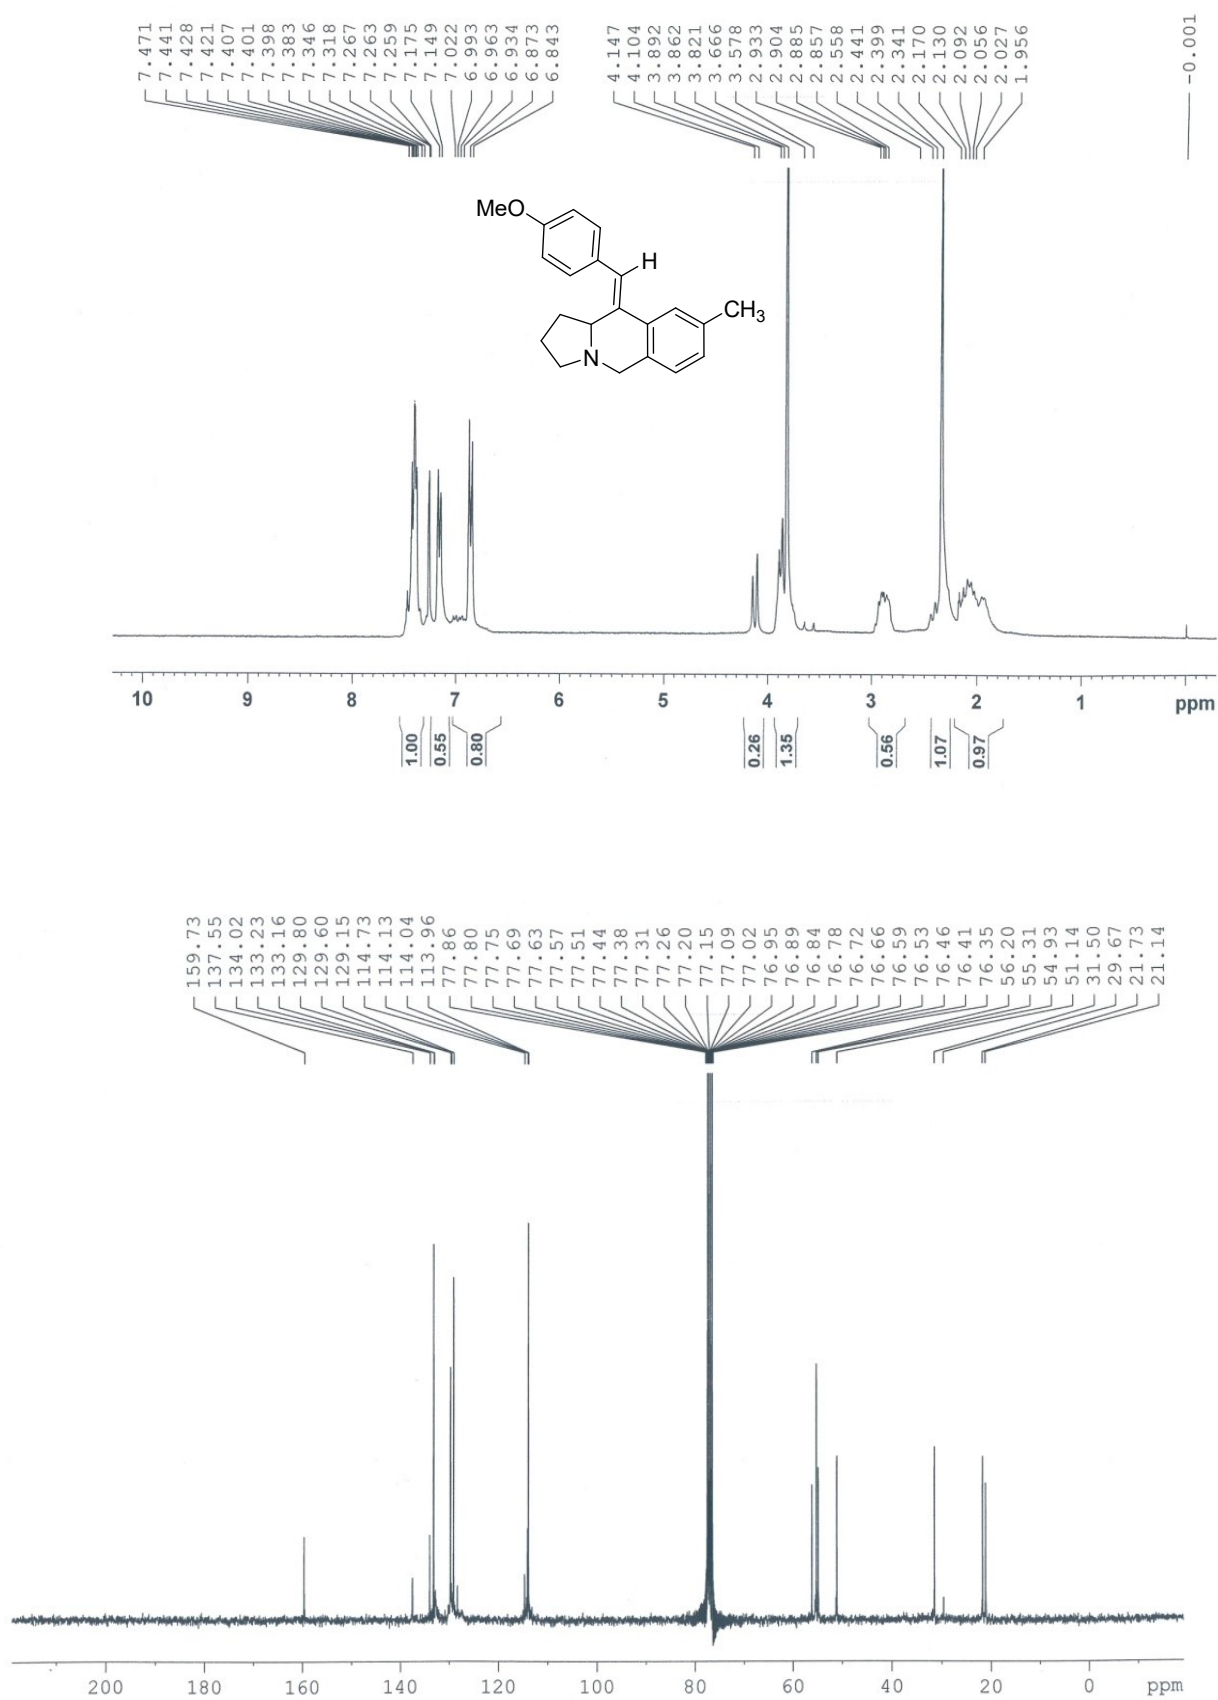

SI Figure 25:  $^1\text{H}$  and  $^{13}\text{C}$ -NMR spectra of compound **8b**

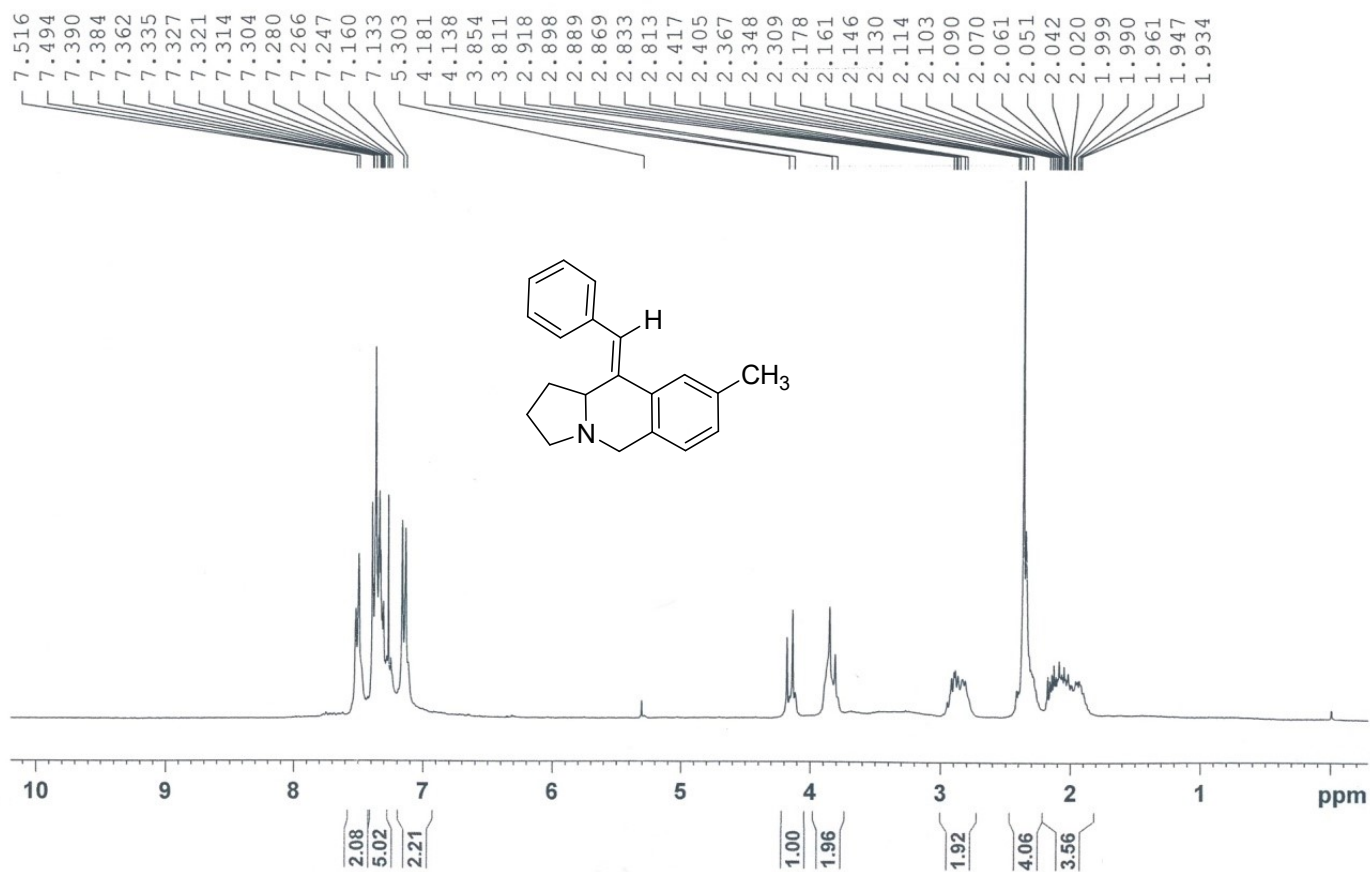



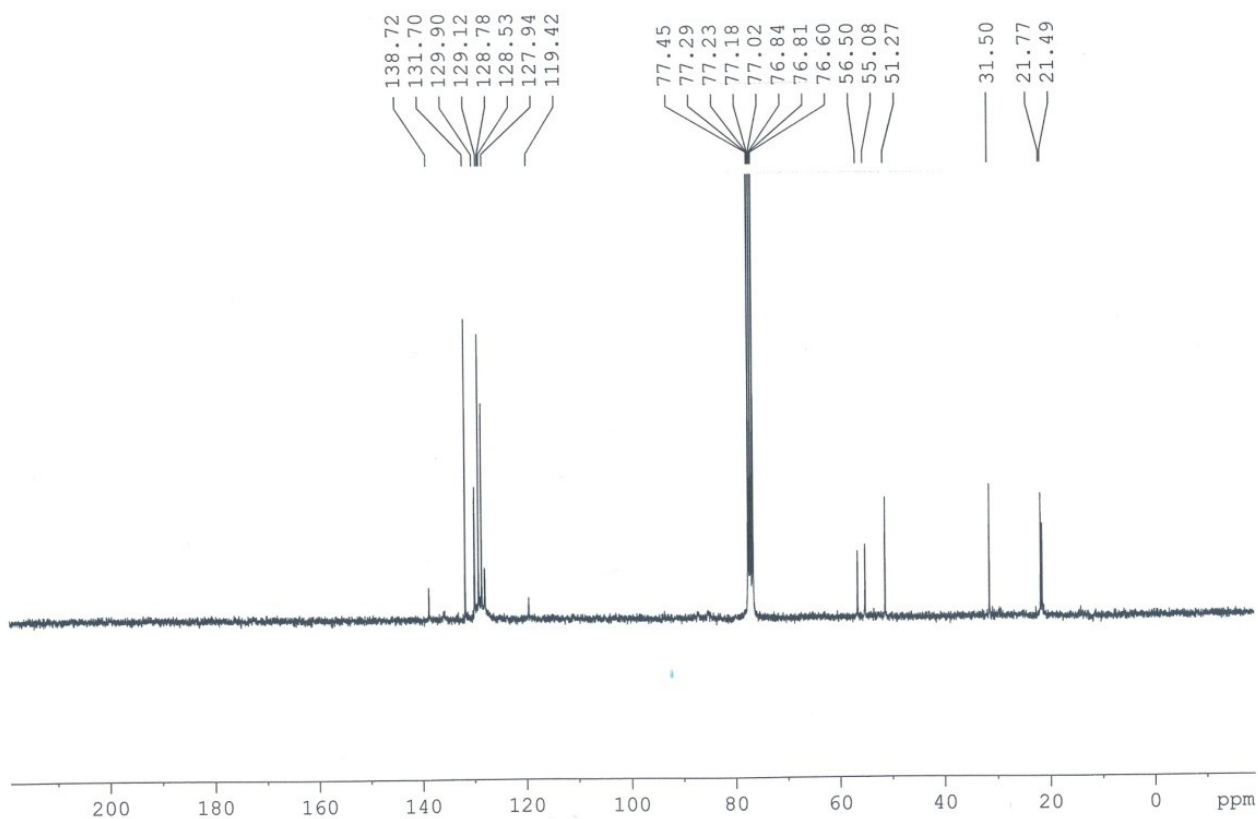

SI Figure 26:  $^1\text{H}$  and  $^{13}\text{C}$ -NMR spectra of compound **8c**

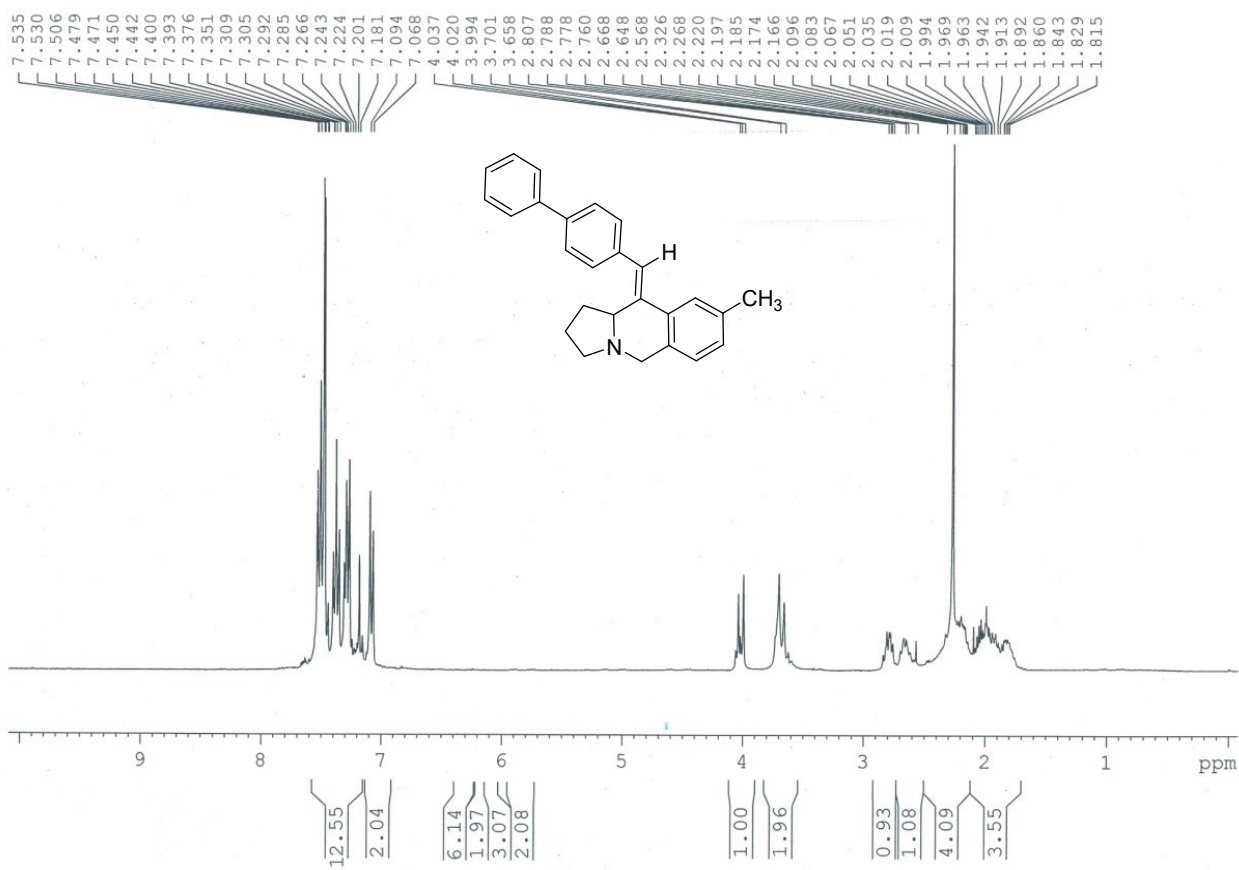

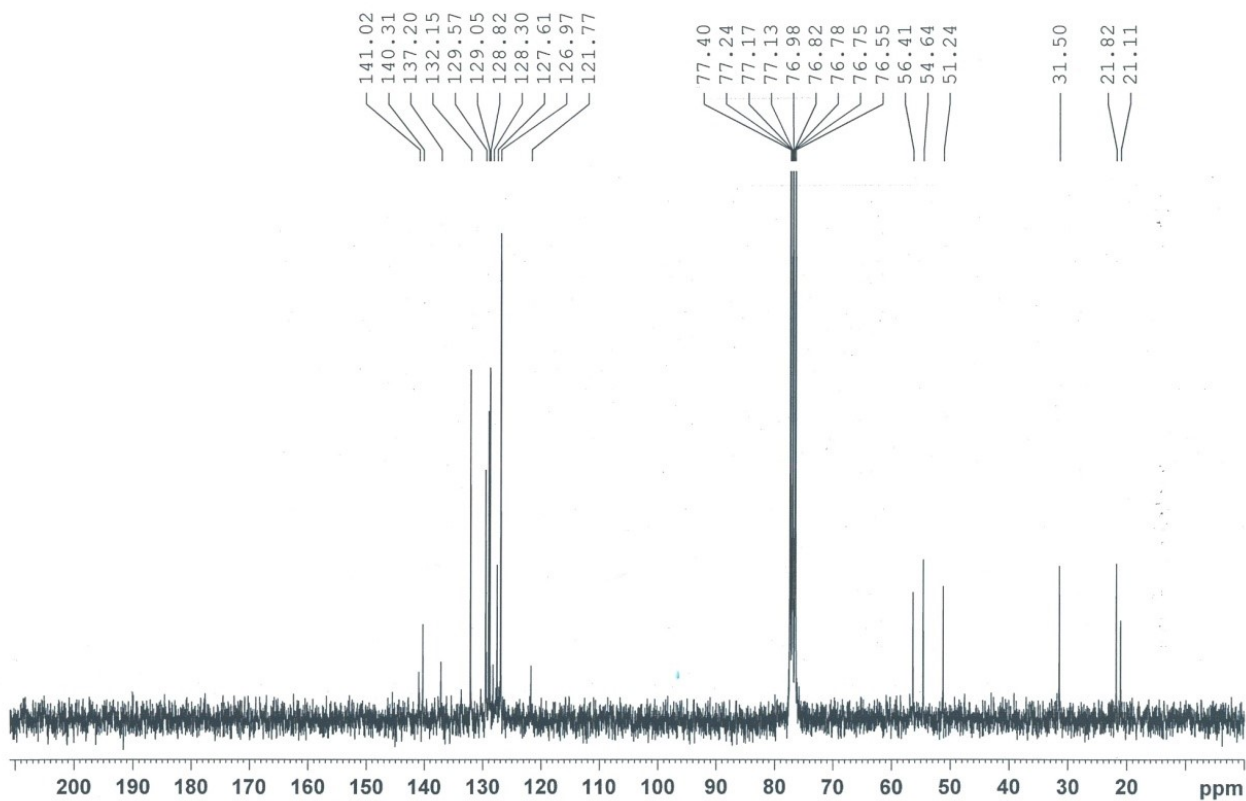

SI Figure 27:  $^1\text{H}$  and  $^{13}\text{C}$ -NMR spectra of compound **8d**

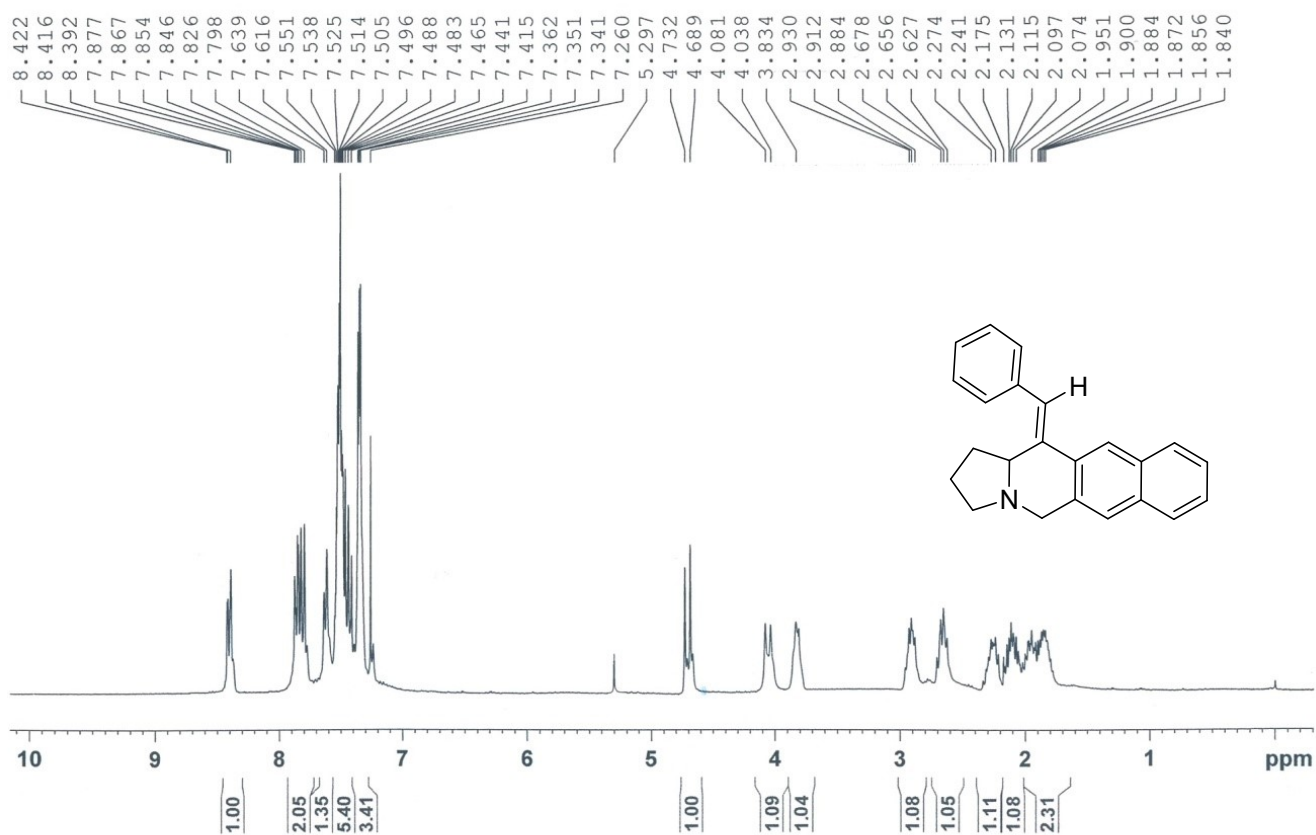

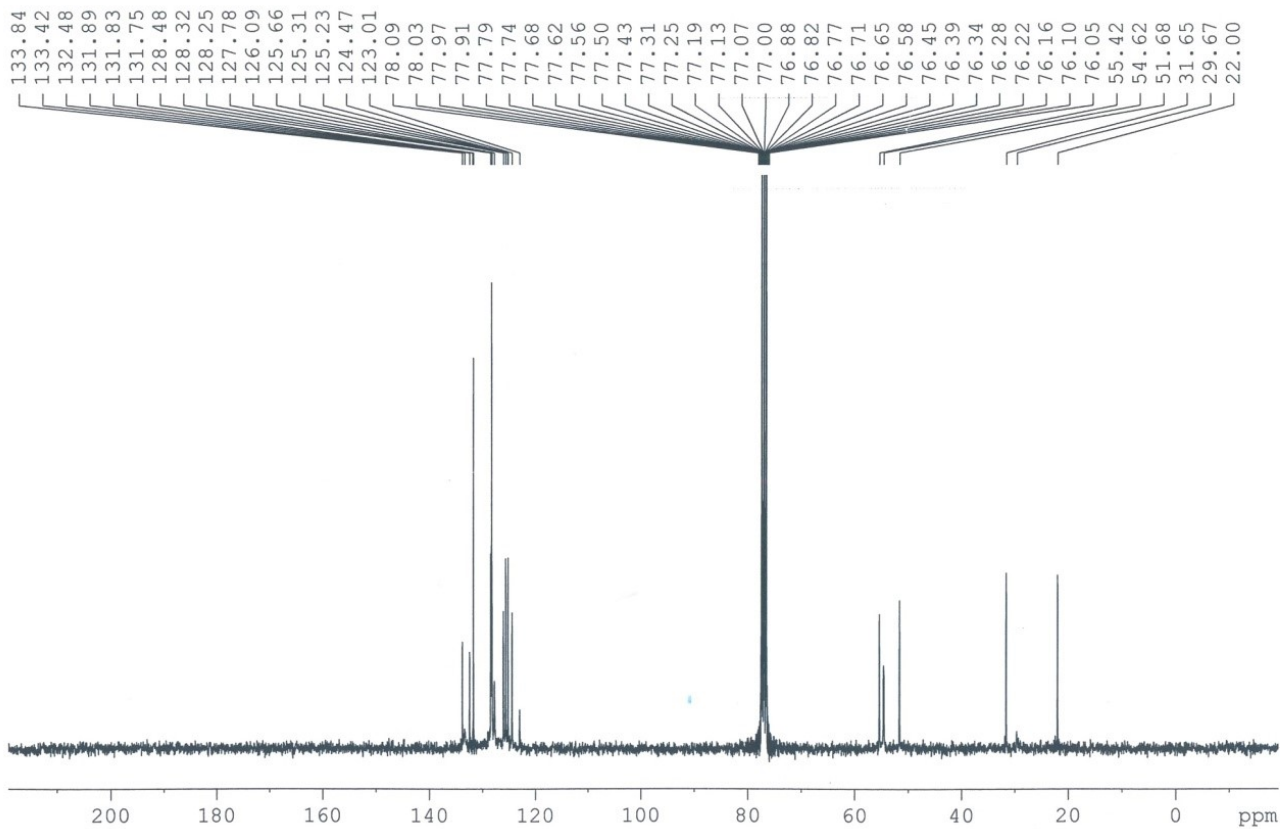

SI Figure 28:  $^1\text{H}$  and  $^{13}\text{C}$ -NMR spectra of compound **9a**

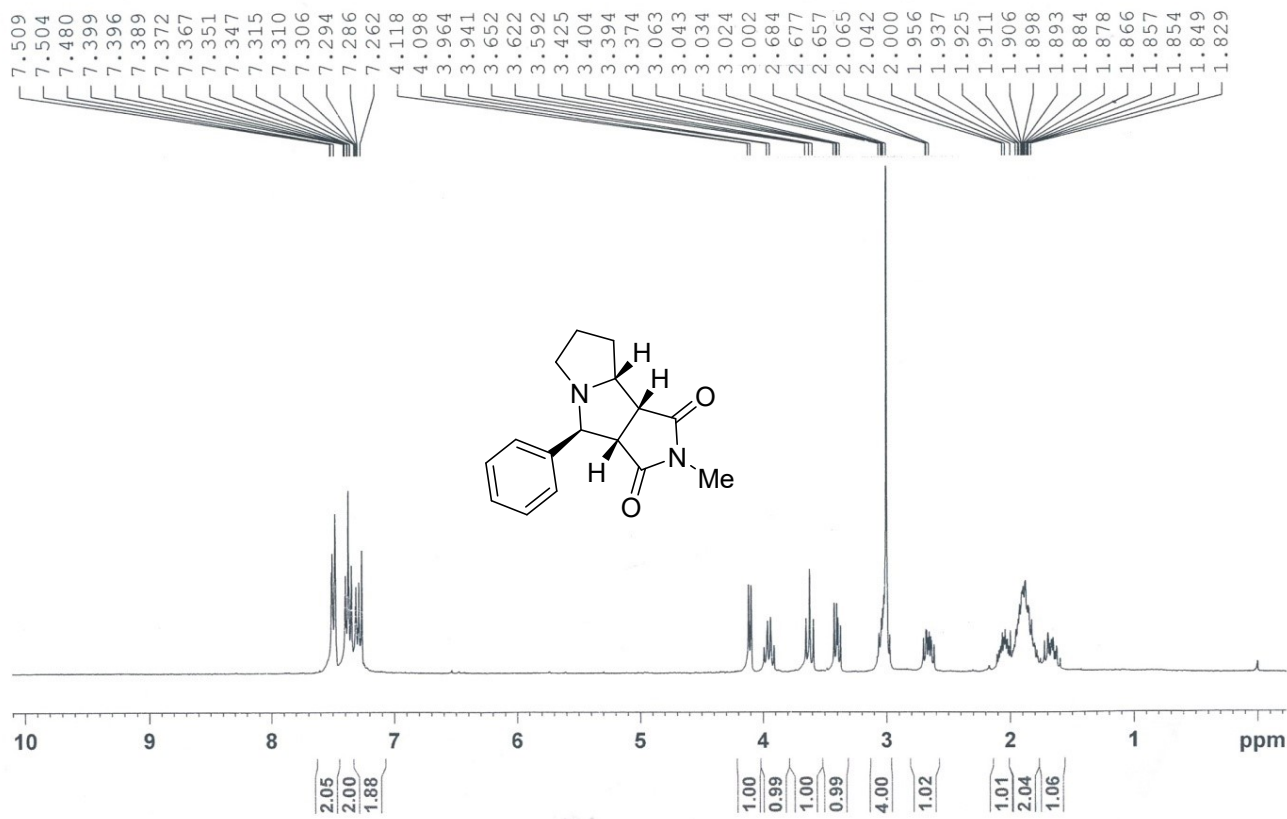

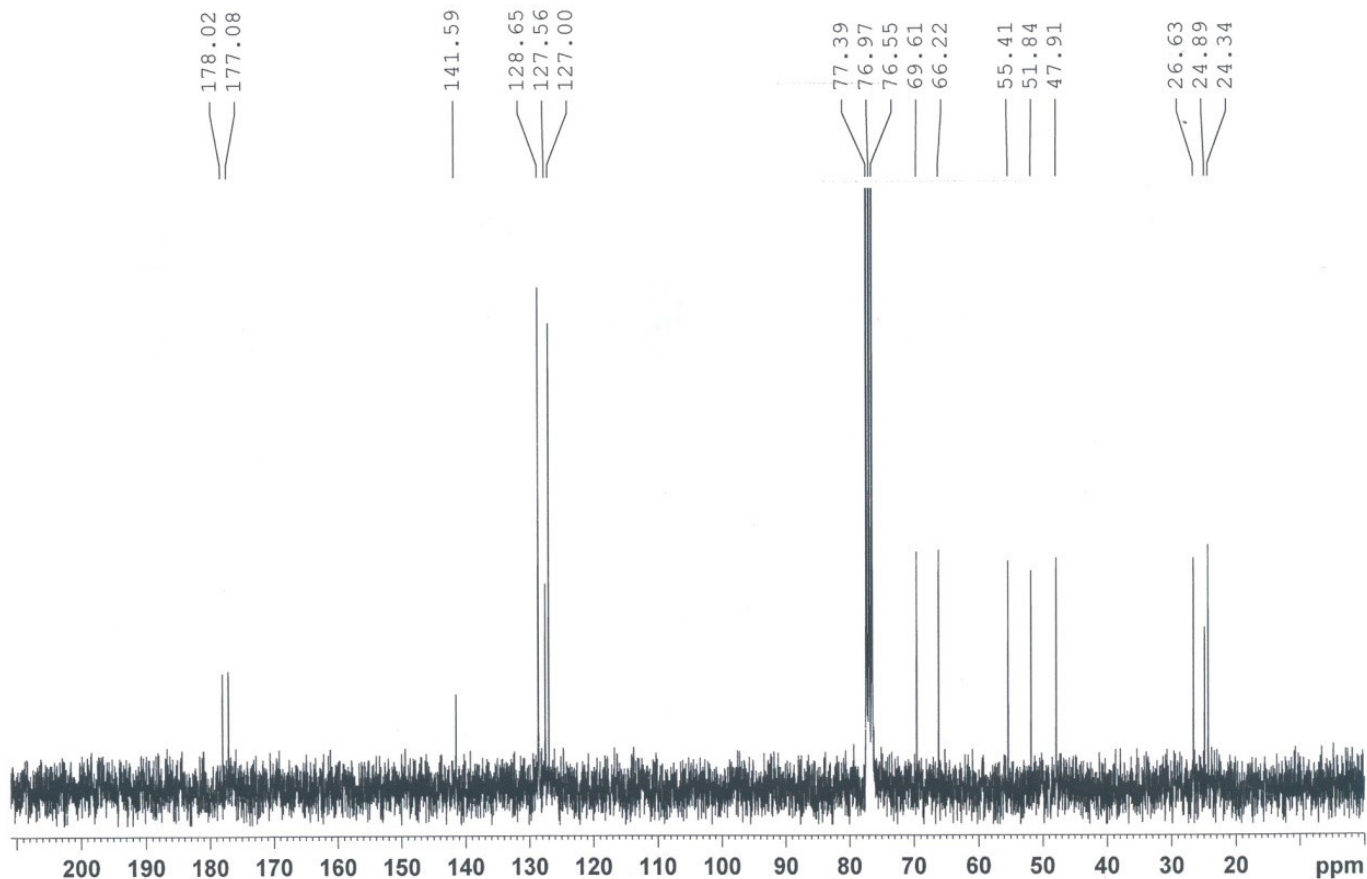

SI Figure 29:  $^1\text{H}$ ,  $^{13}\text{C}$  and  $^{19}\text{F}$ -NMR spectra of compound **9b**

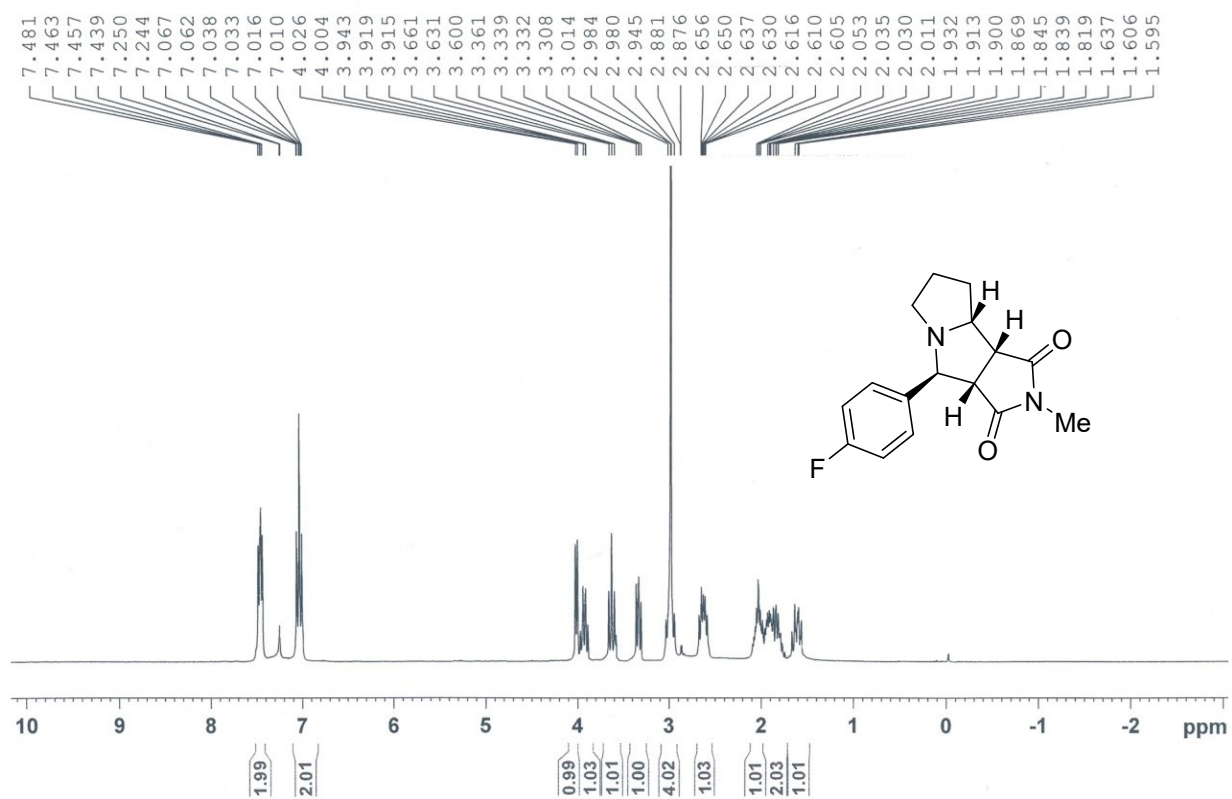

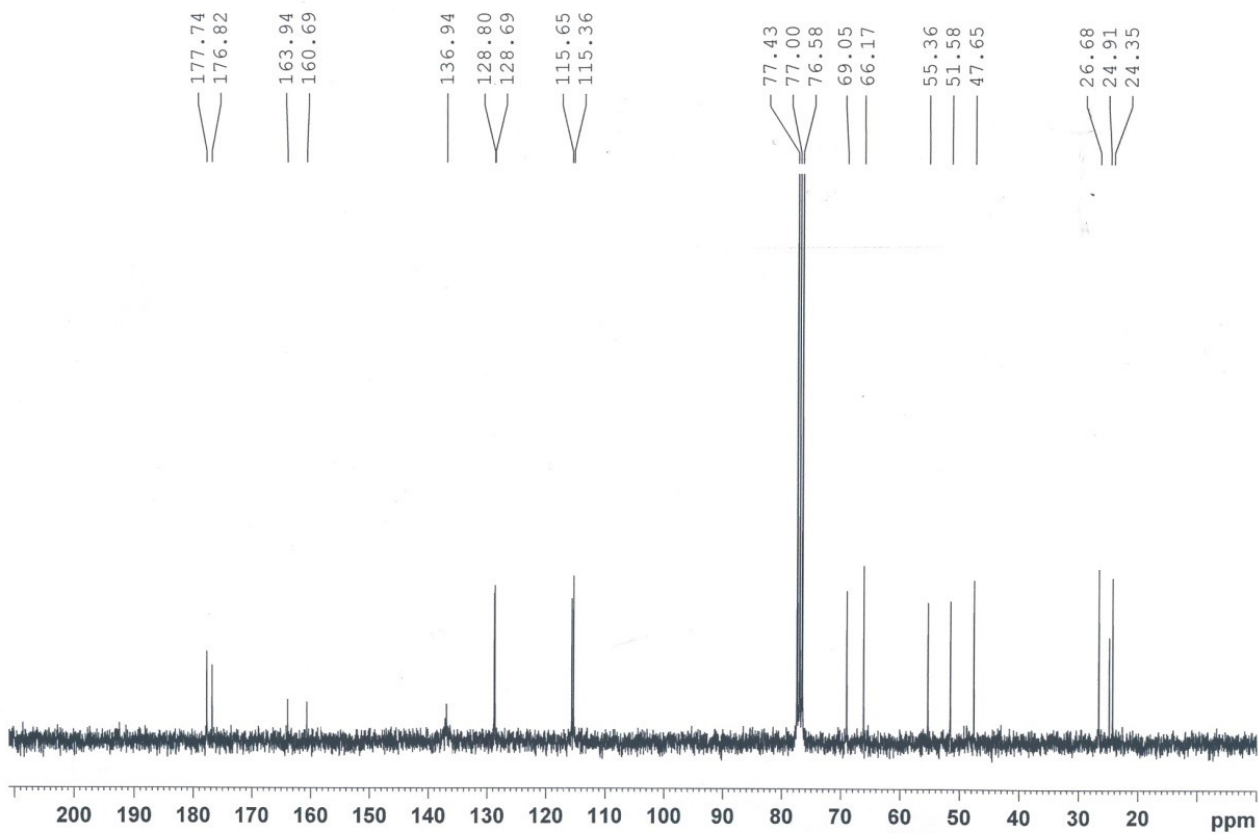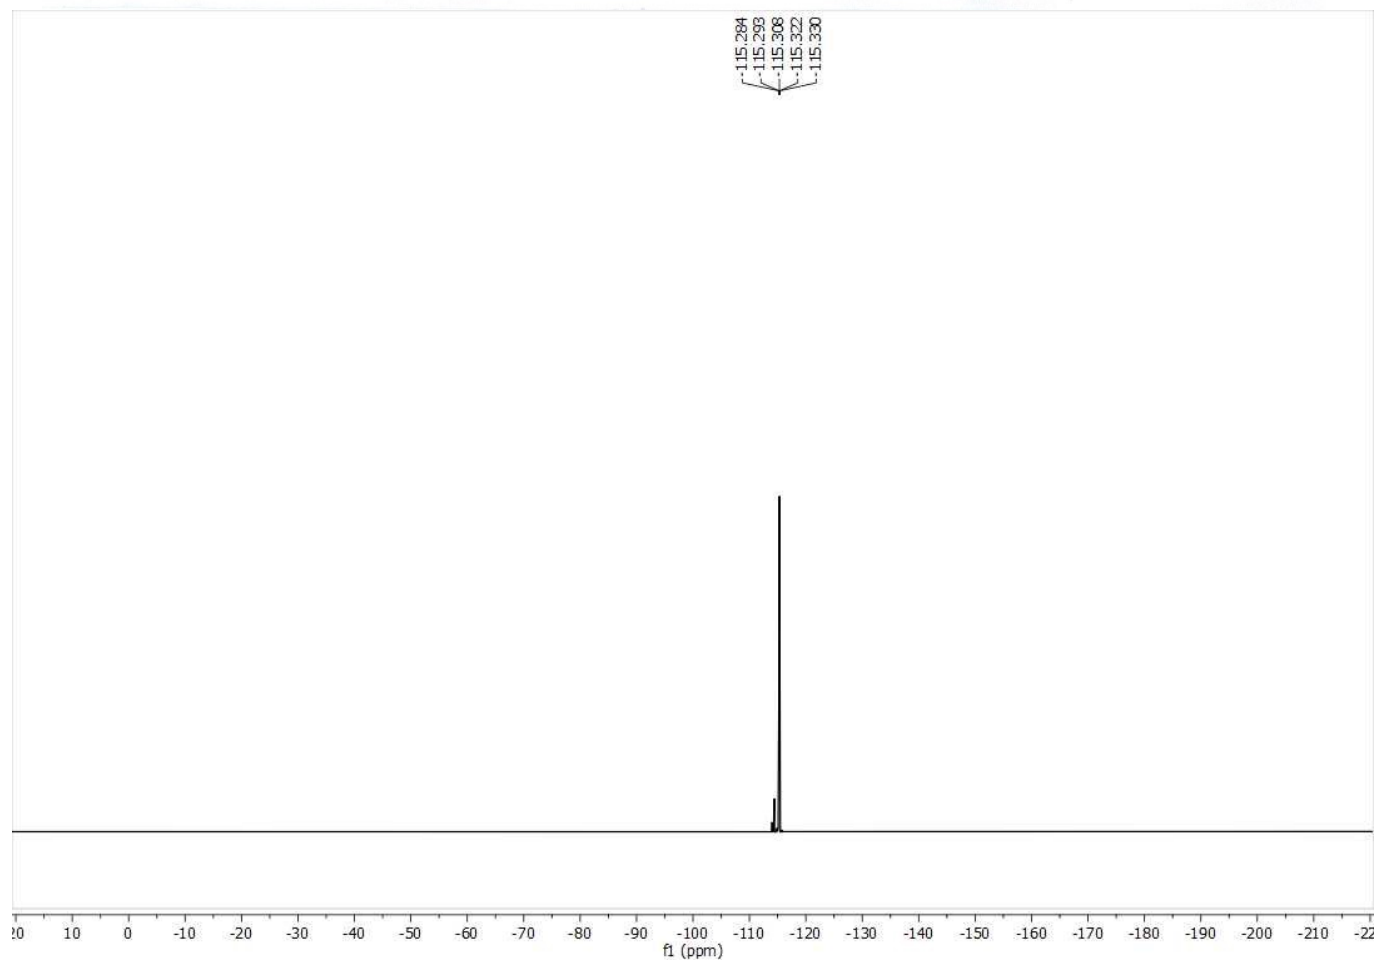

SI Figure 30:  $^1\text{H}$  and  $^{13}\text{C}$ -NMR spectra of compound **9c**

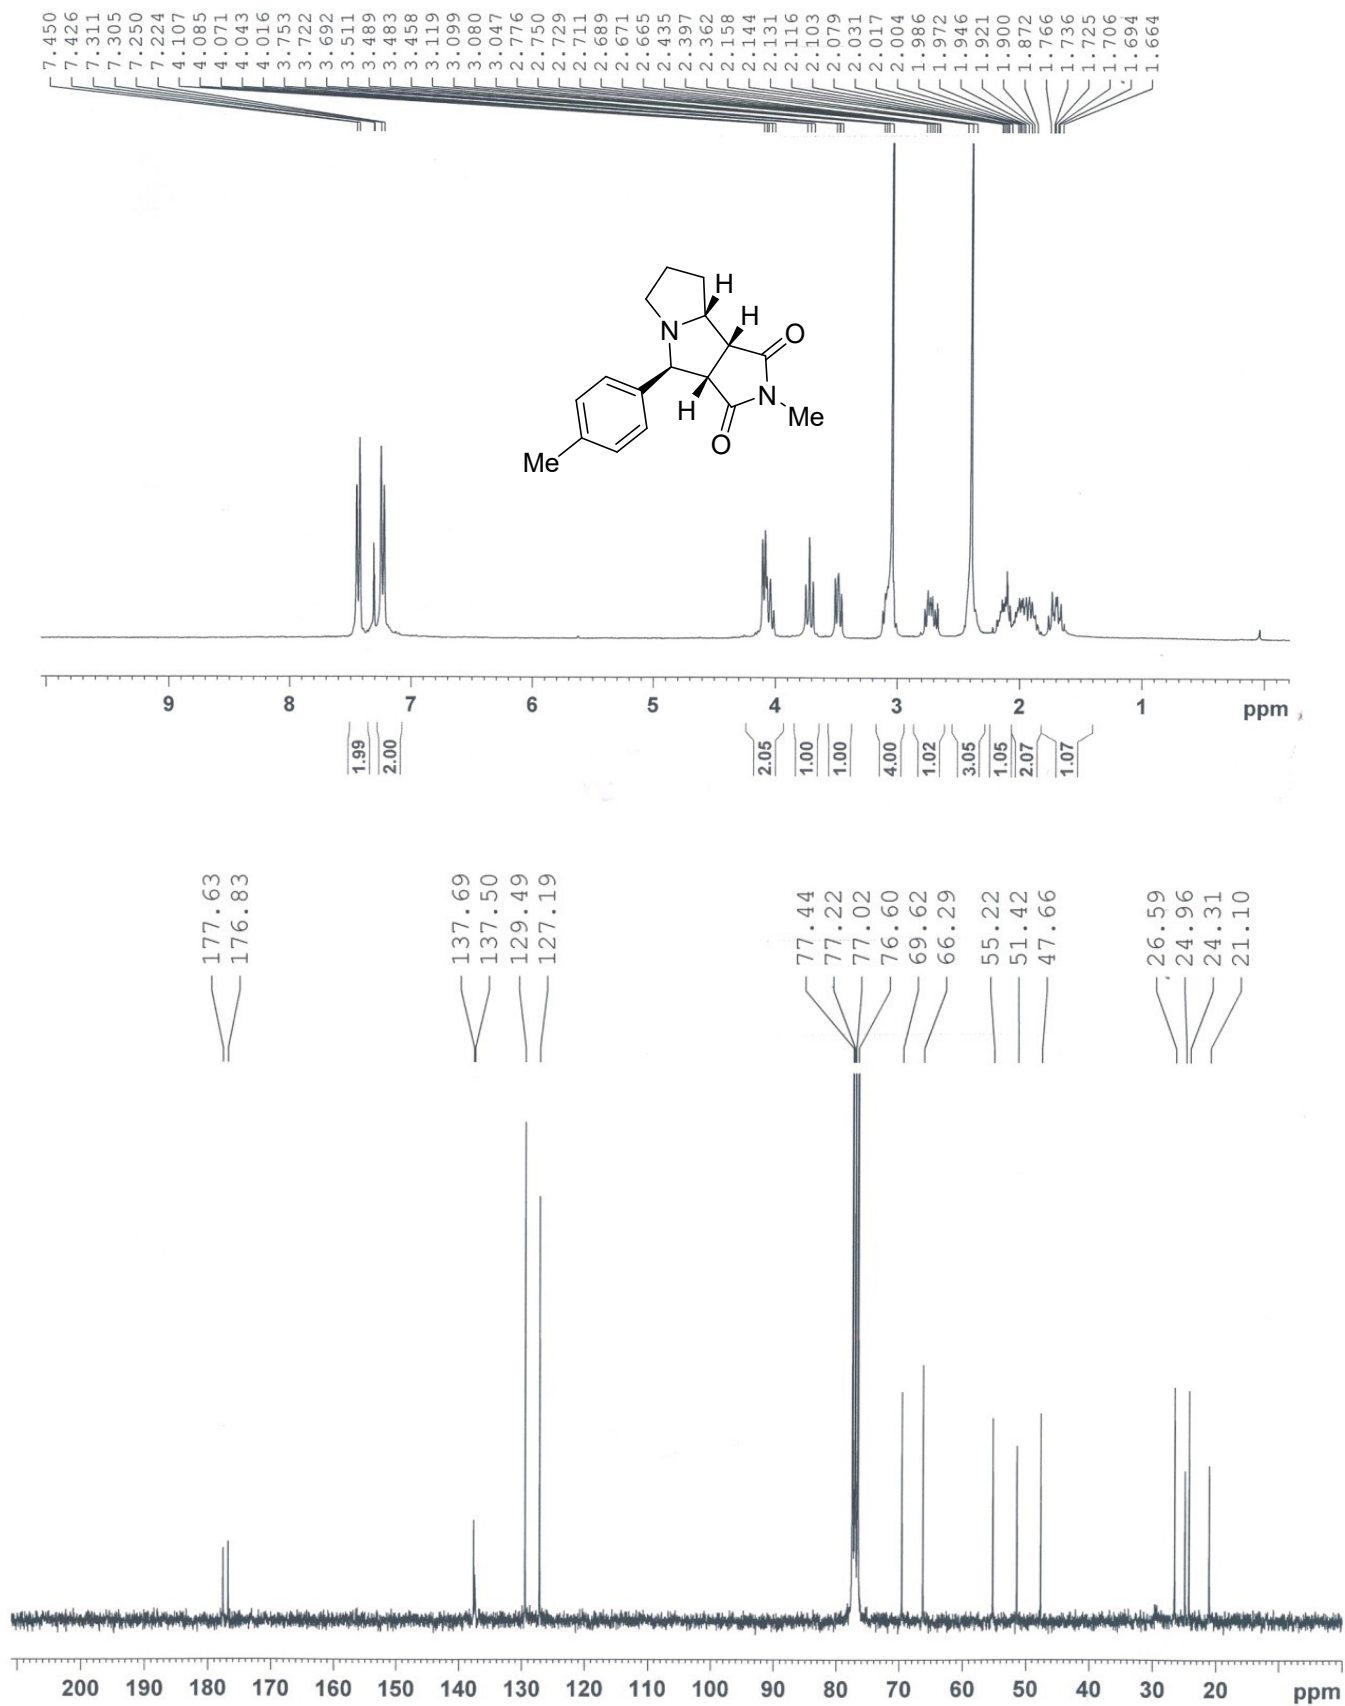

SI Figure 31:  $^1\text{H}$  and  $^{13}\text{C}$ -NMR spectra of compound **9d**



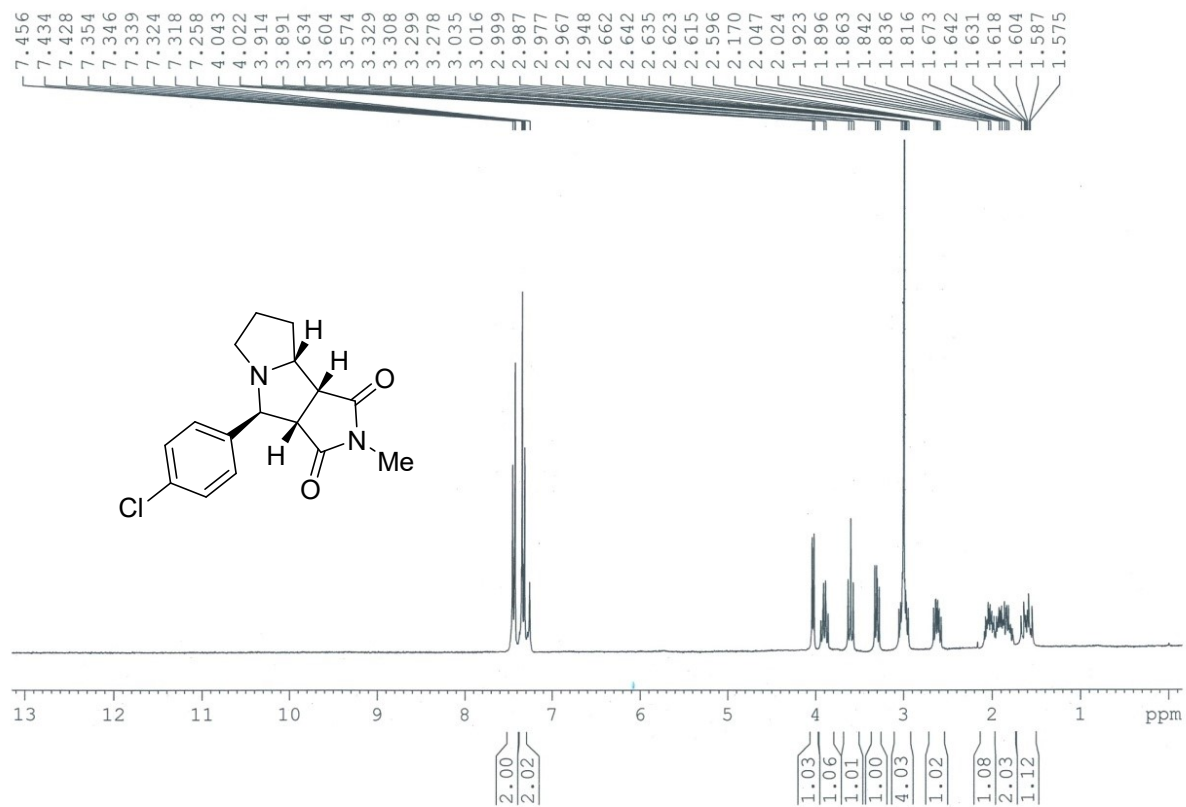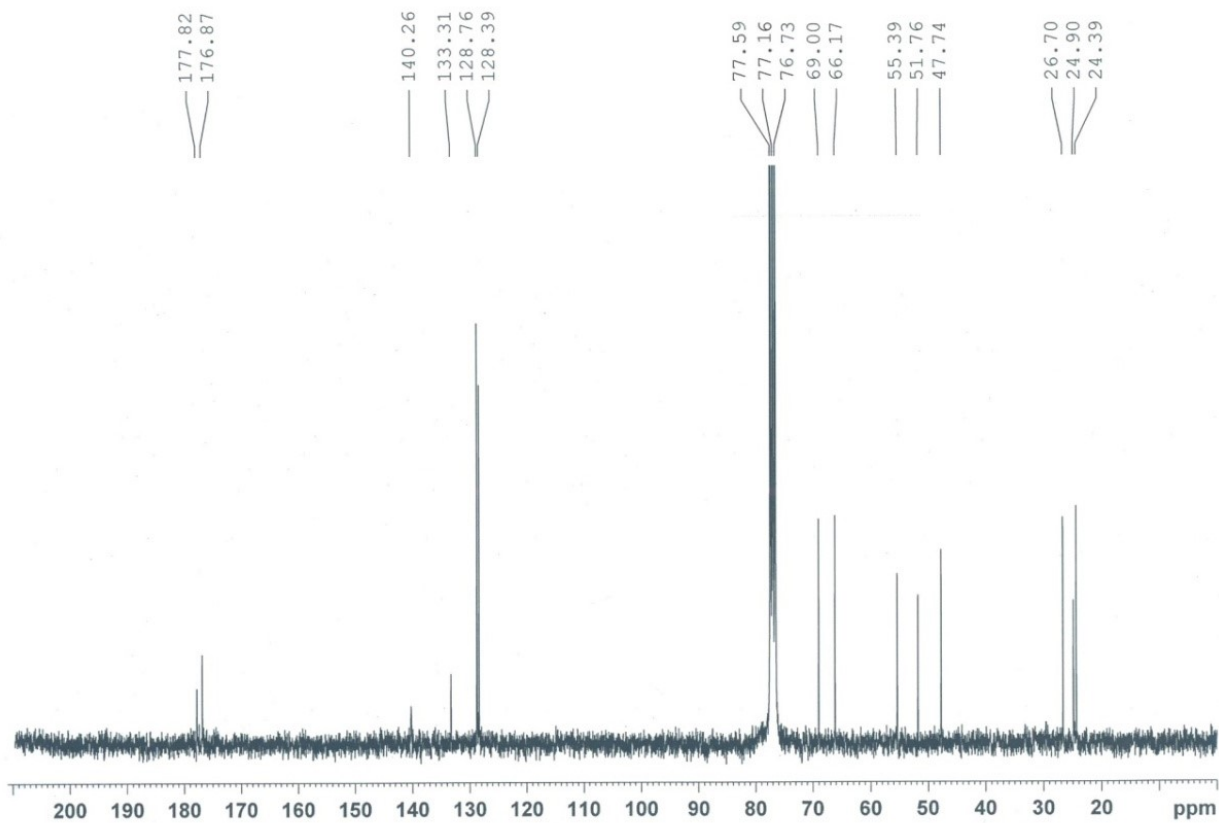

SI Figure 32: <sup>1</sup>H and <sup>13</sup>C-NMR spectra of compound 9e

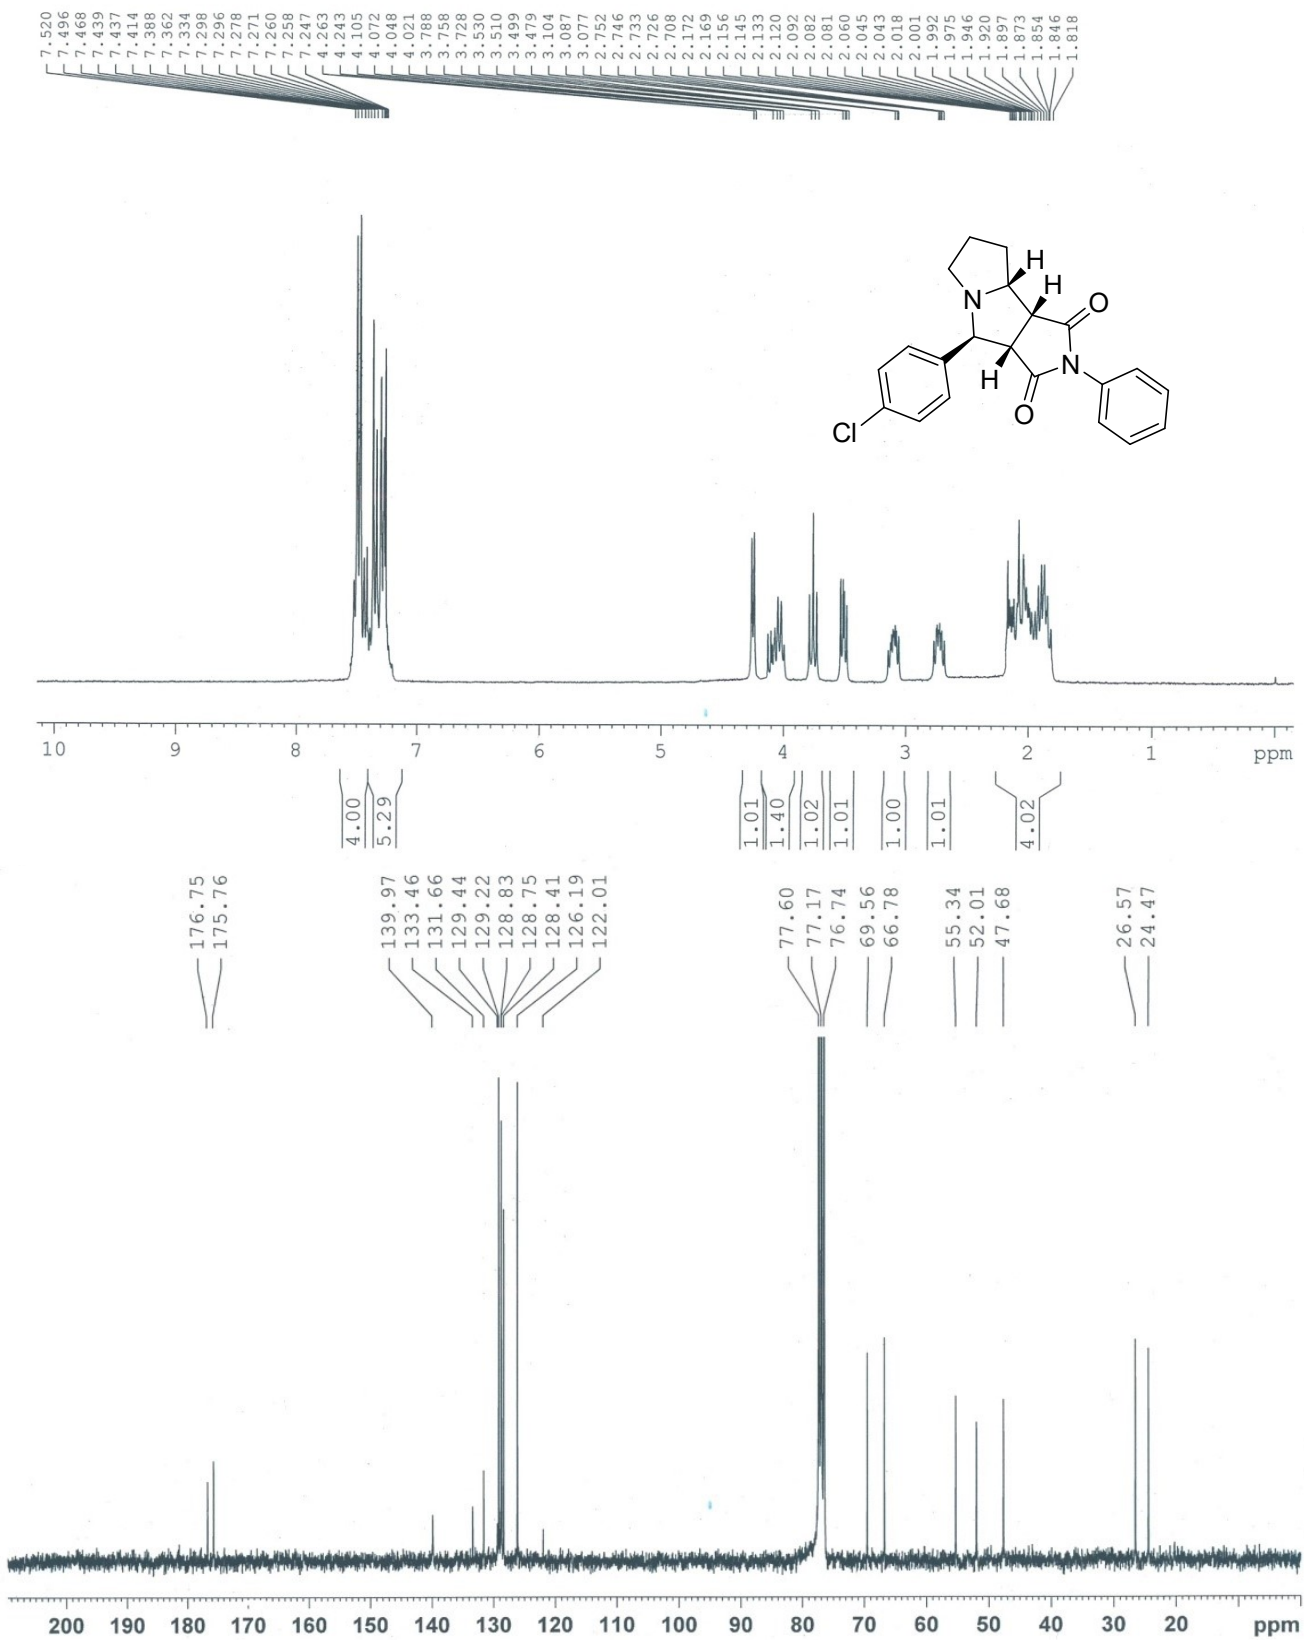



SI Figure 33:  $^1\text{H}$  and  $^{13}\text{C}$ -NMR spectra of compound **9f**

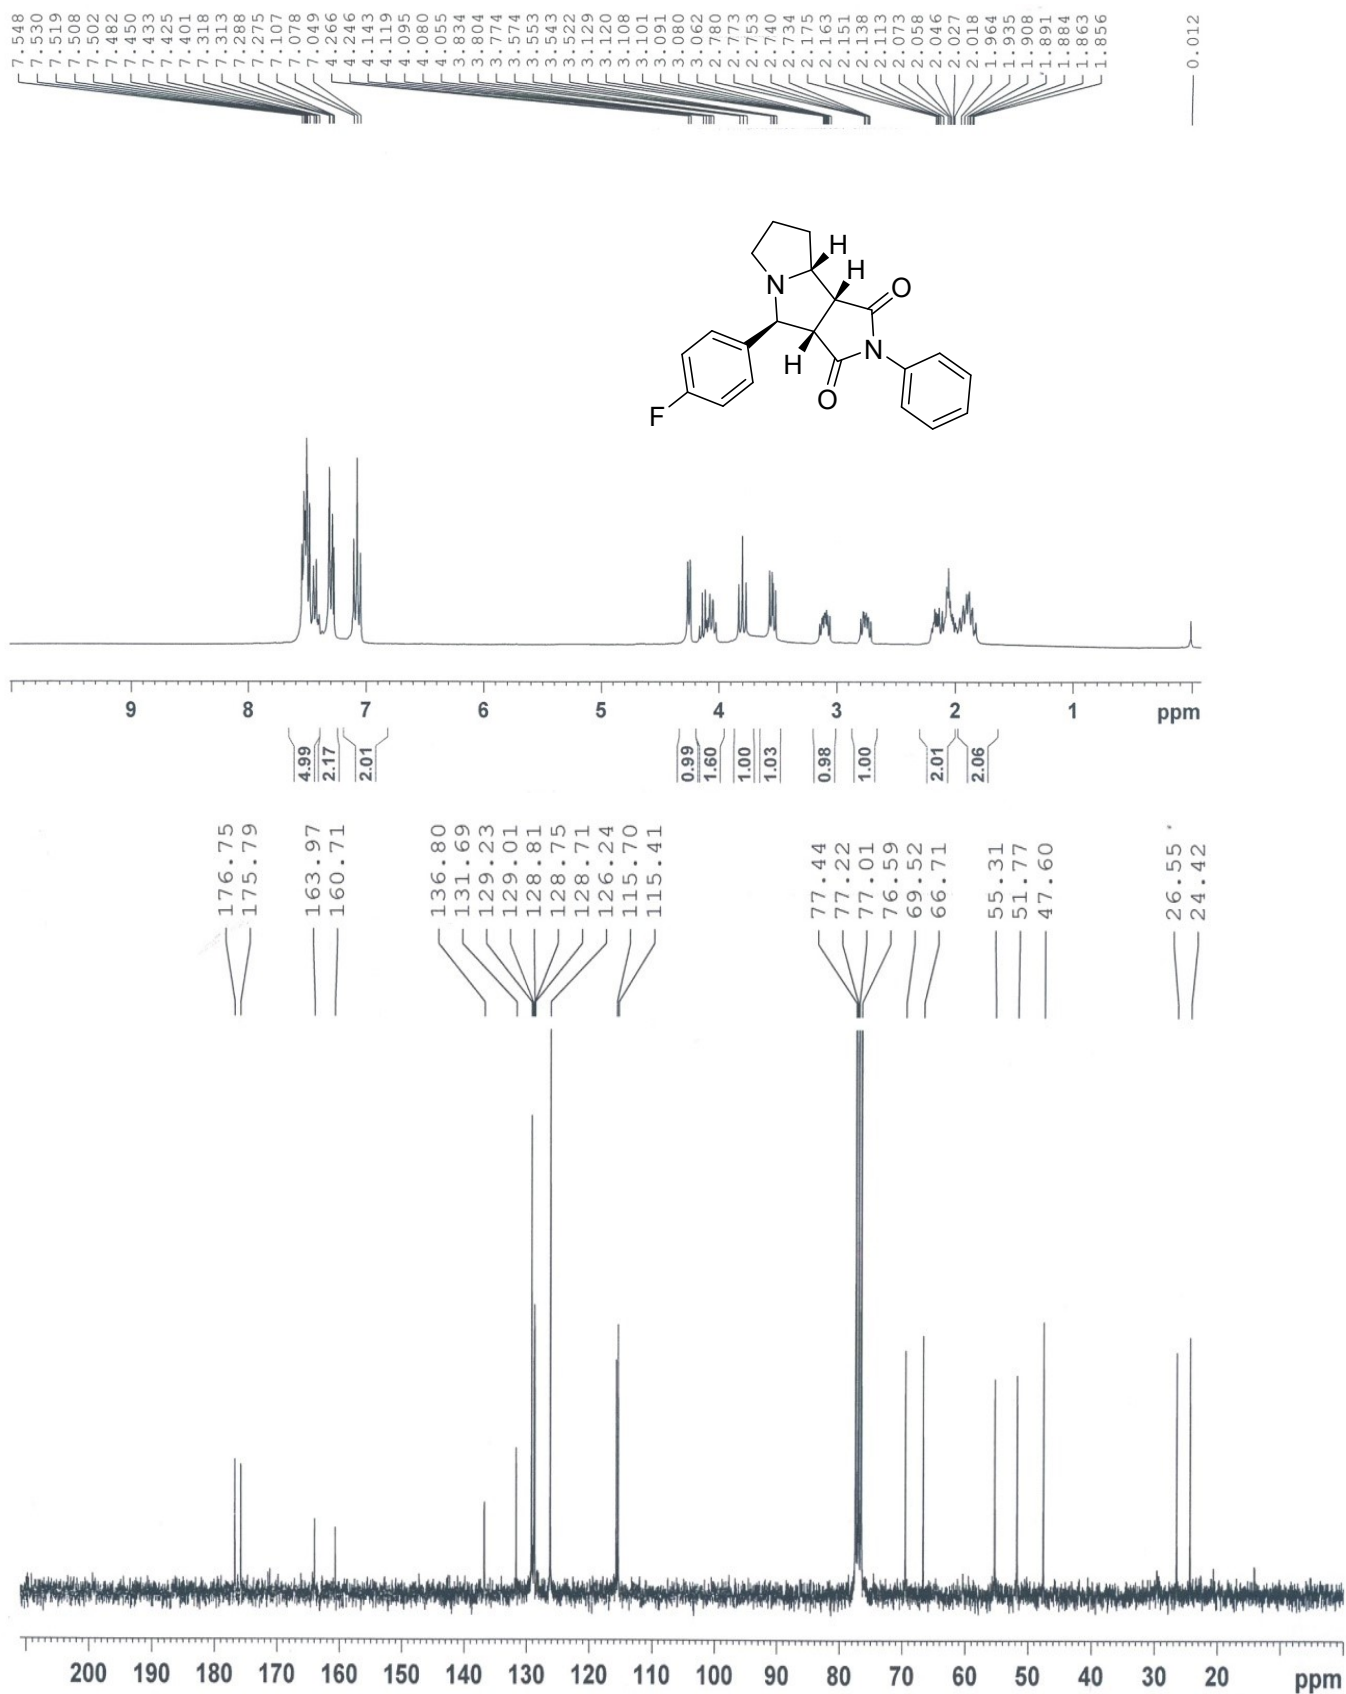

SI Figure 34:  $^1\text{H}$  and  $^{13}\text{C}$ -NMR spectra of compound **9g**

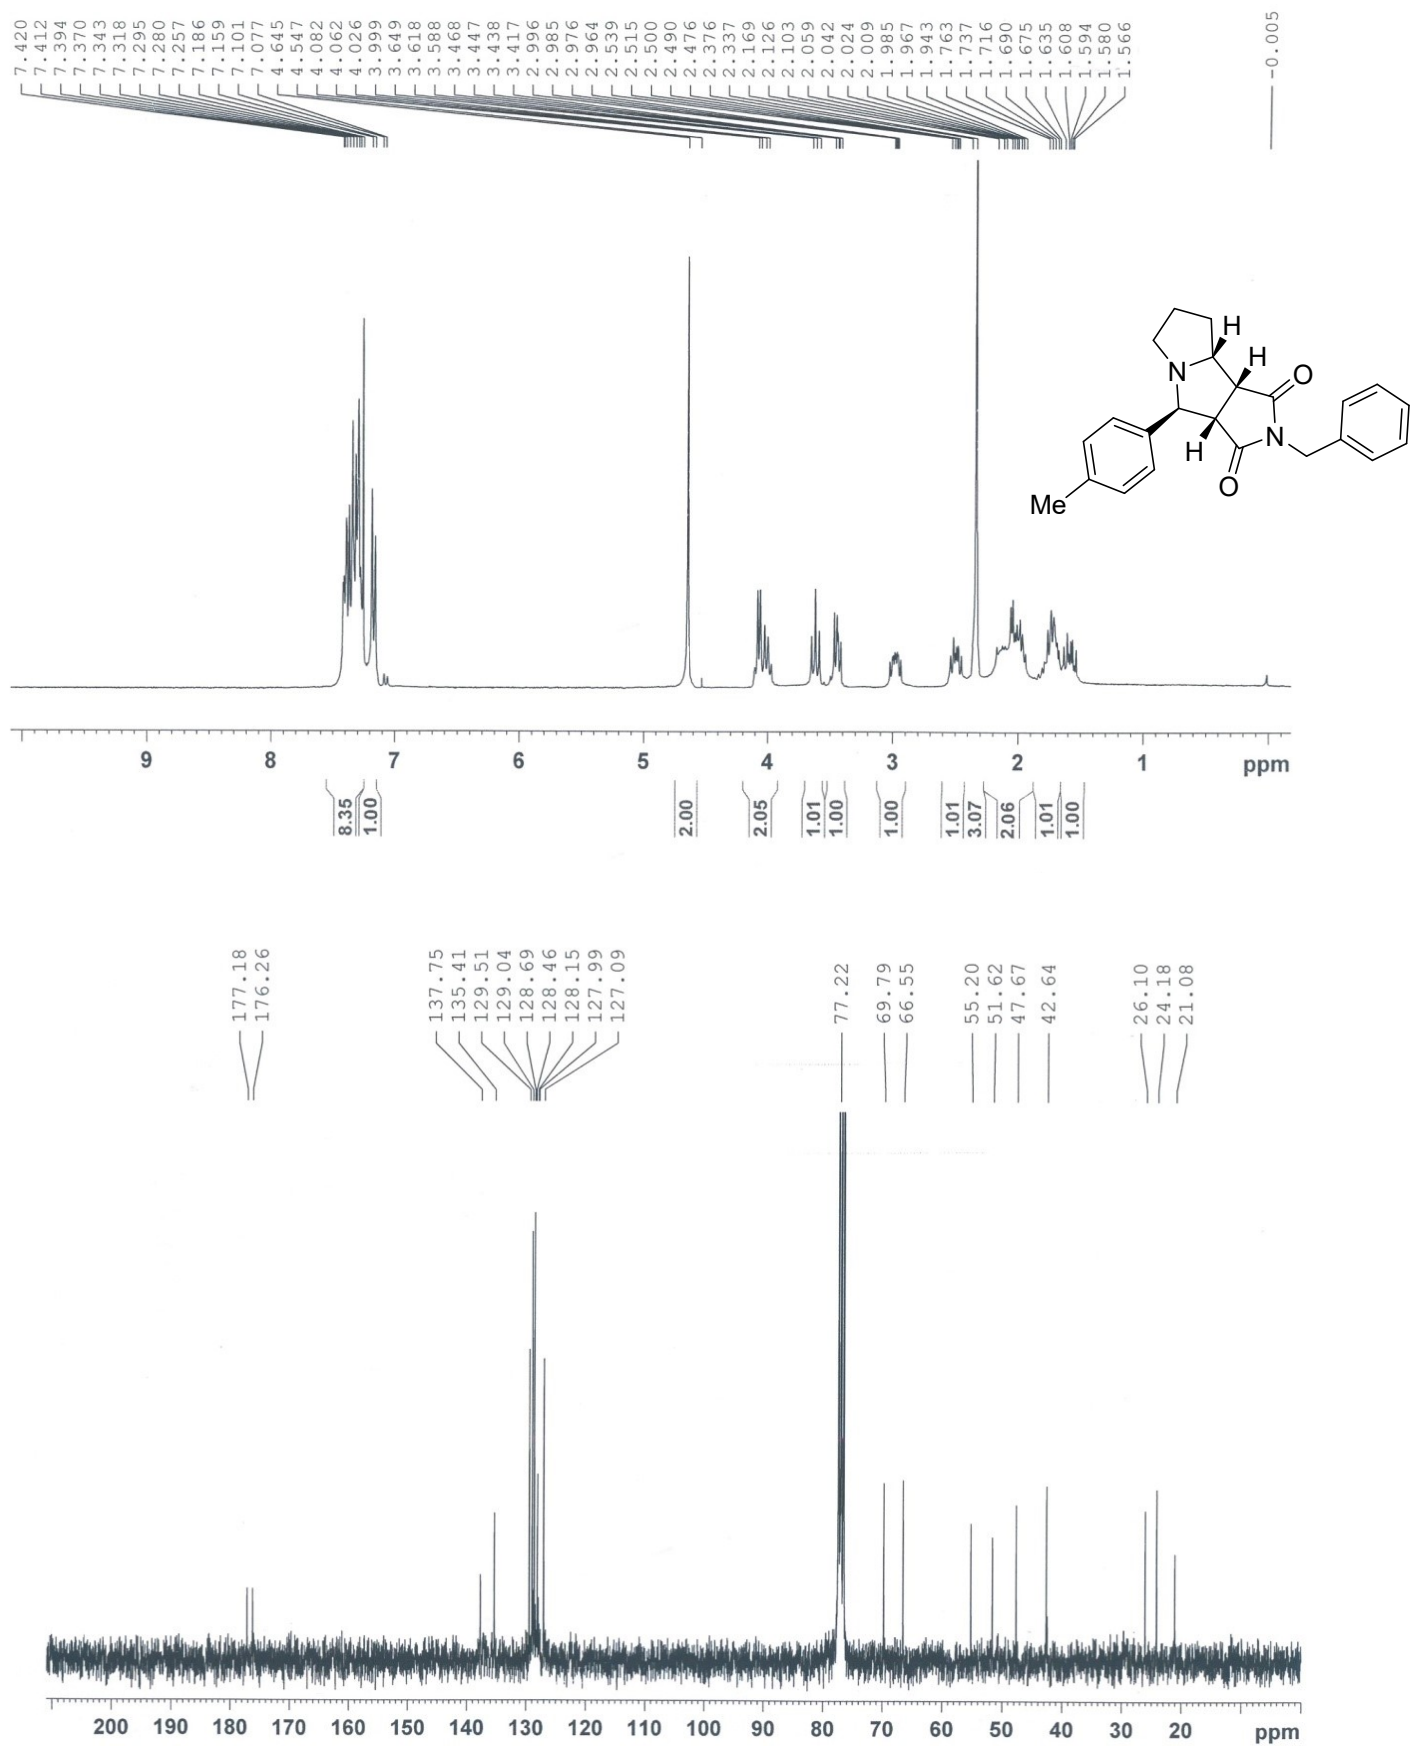

SI Figure 35:  $^1\text{H}$  and  $^{13}\text{C}$ -NMR spectra of compound **9h**

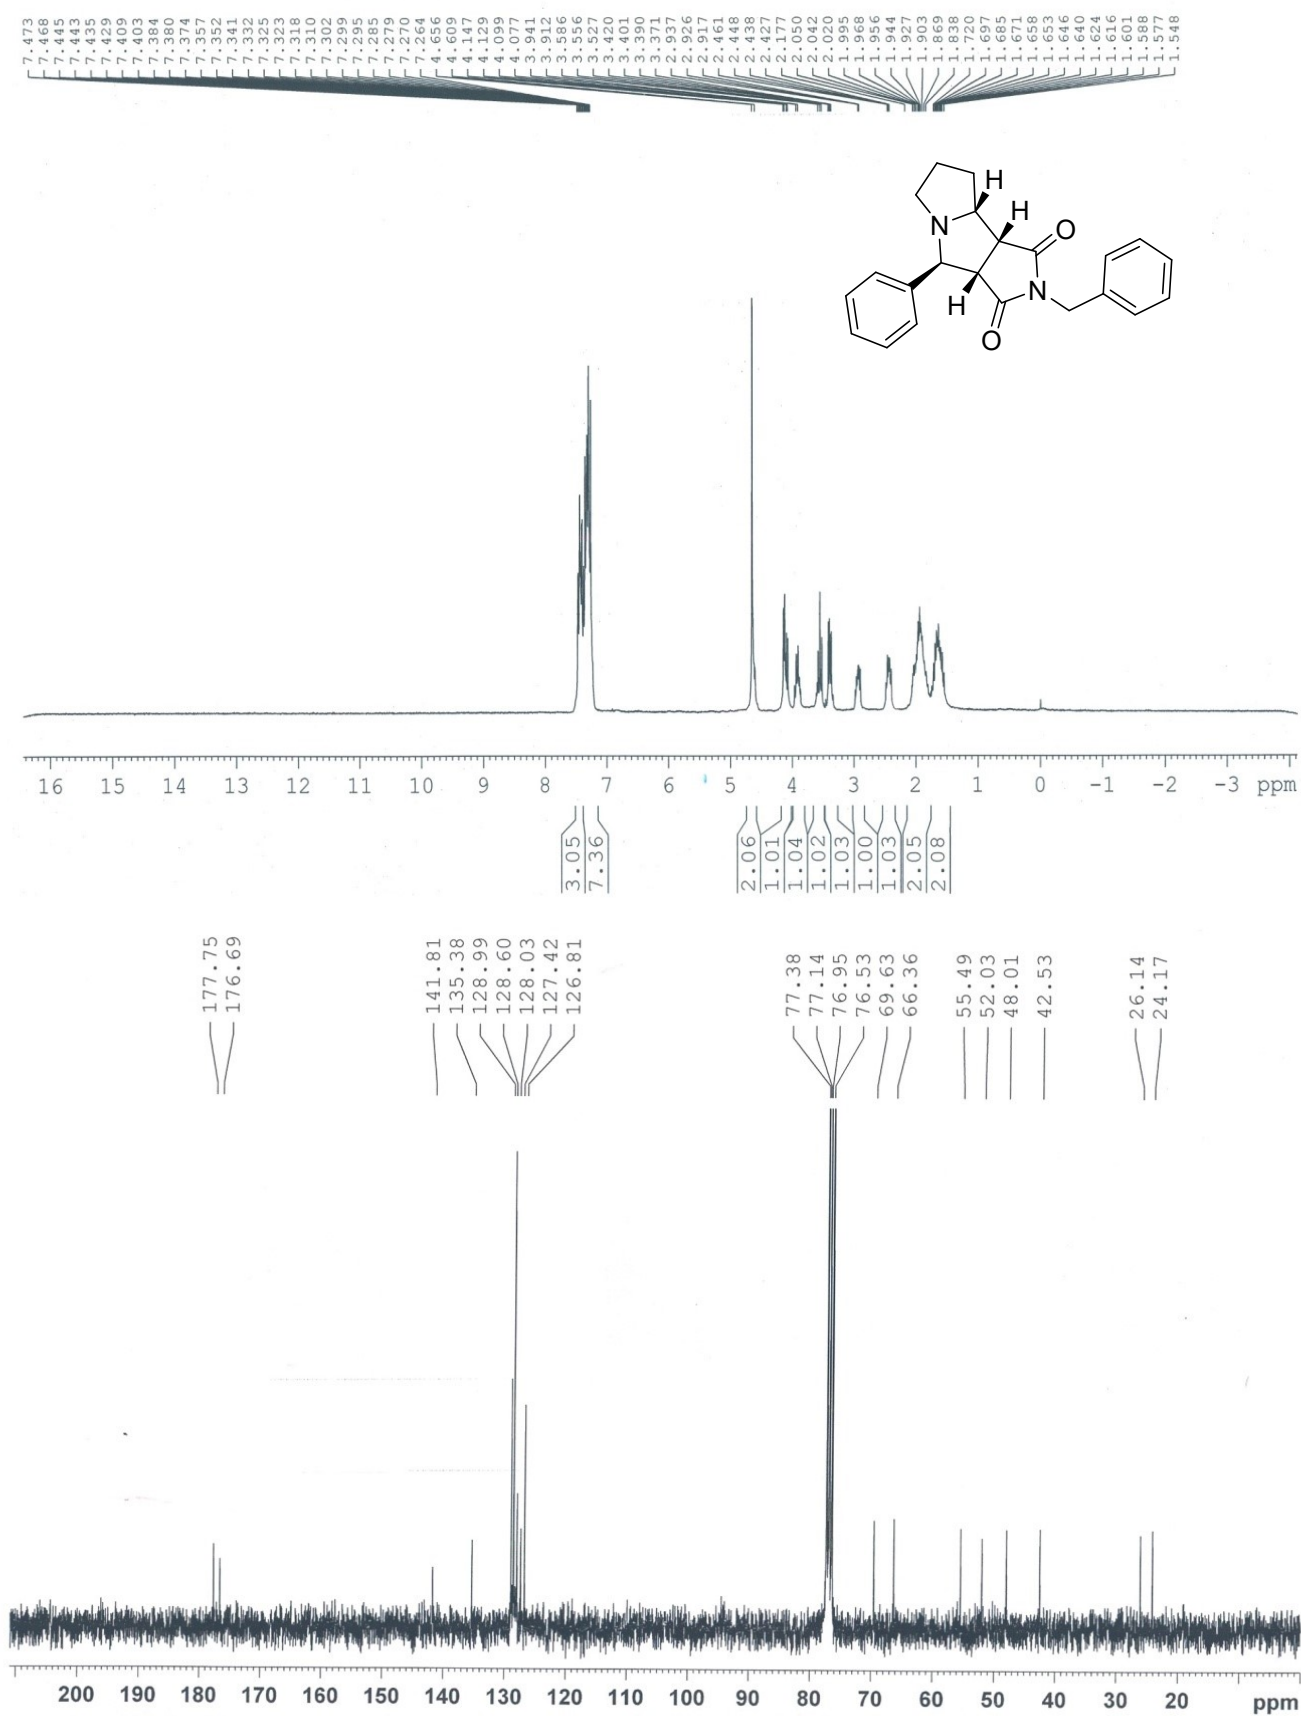

SI Figure 36:  $^1\text{H}$  and  $^{13}\text{C}$ -NMR spectra of compound **9i**

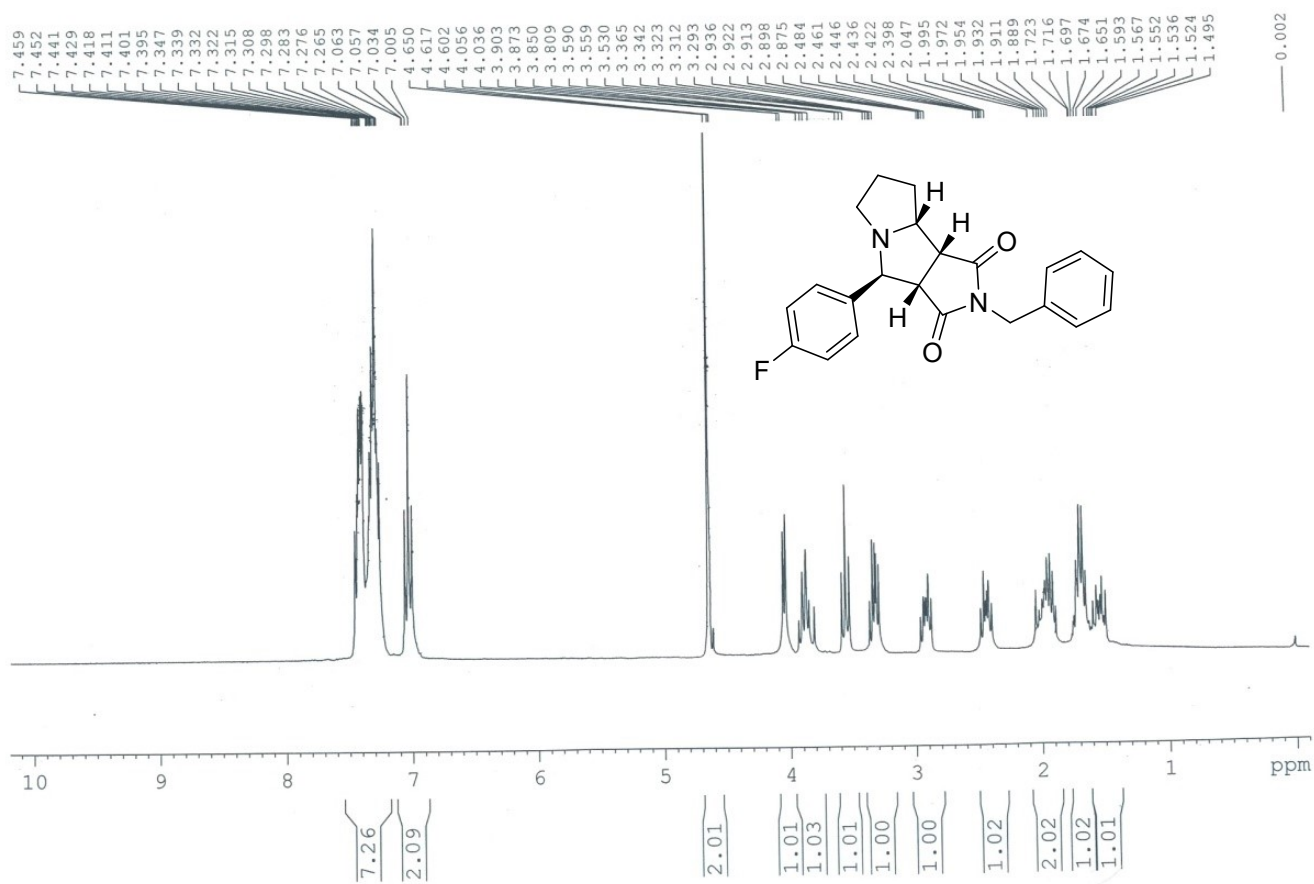

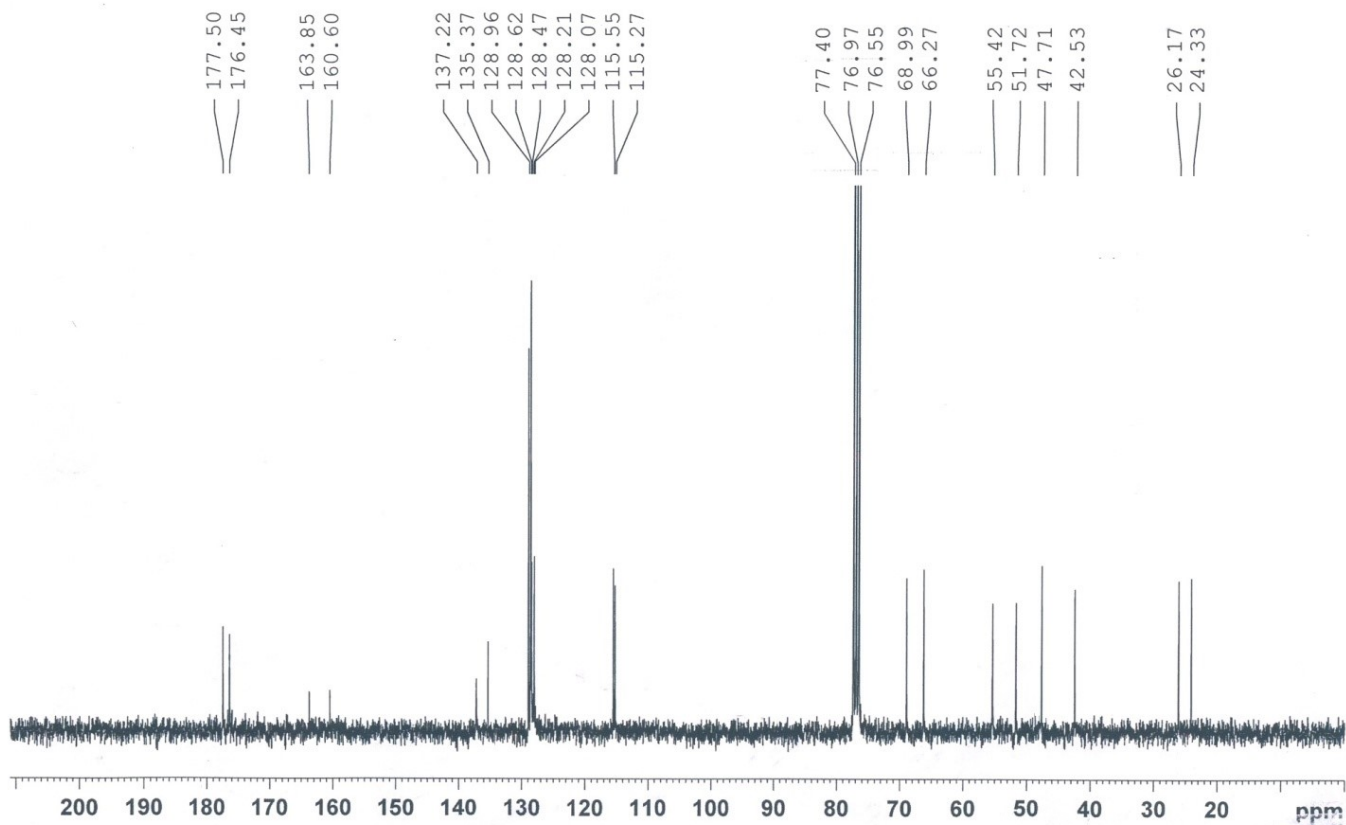

SI Figure 37:  $^1\text{H}$  and  $^{13}\text{C}$ -NMR spectra of compound **9j**

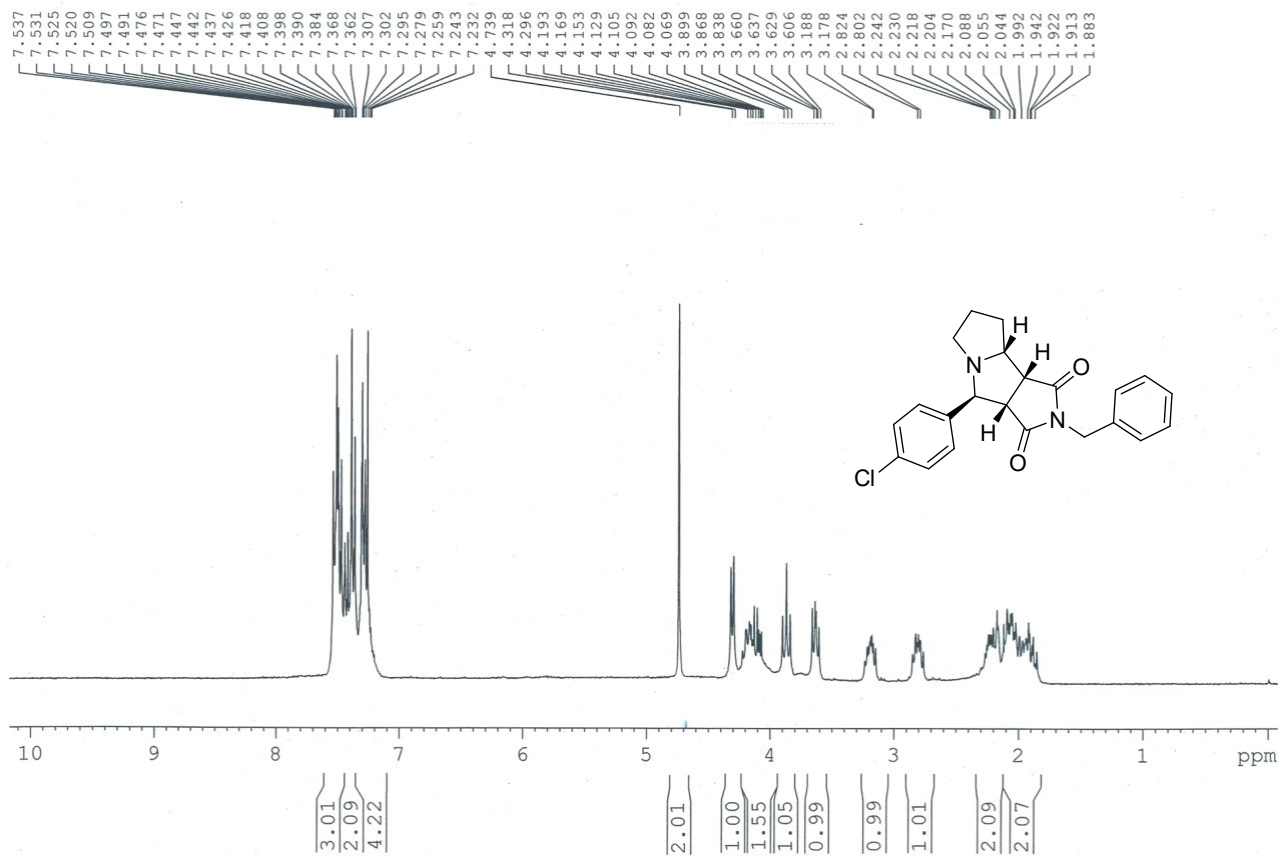



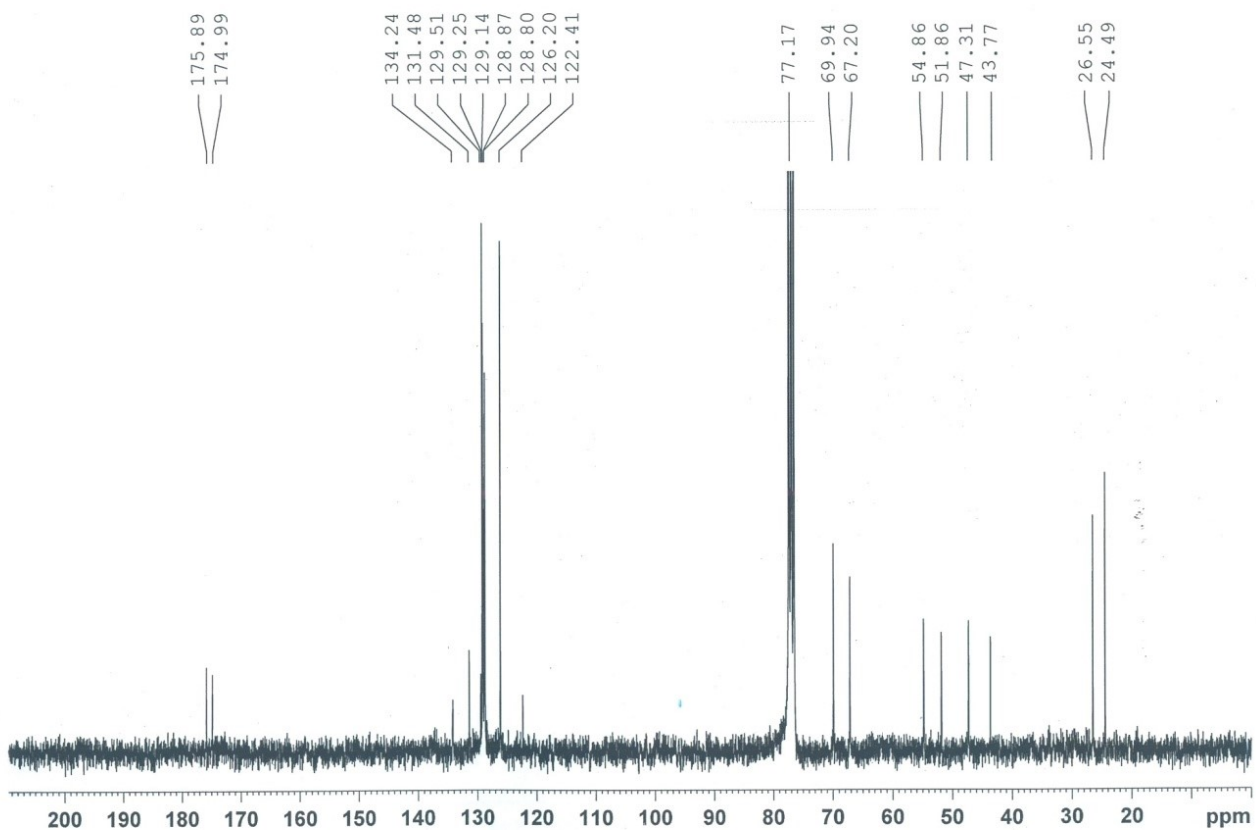

SI Figure 38:  $^1\text{H}$  and  $^{13}\text{C}$ -NMR spectra of compound 10a

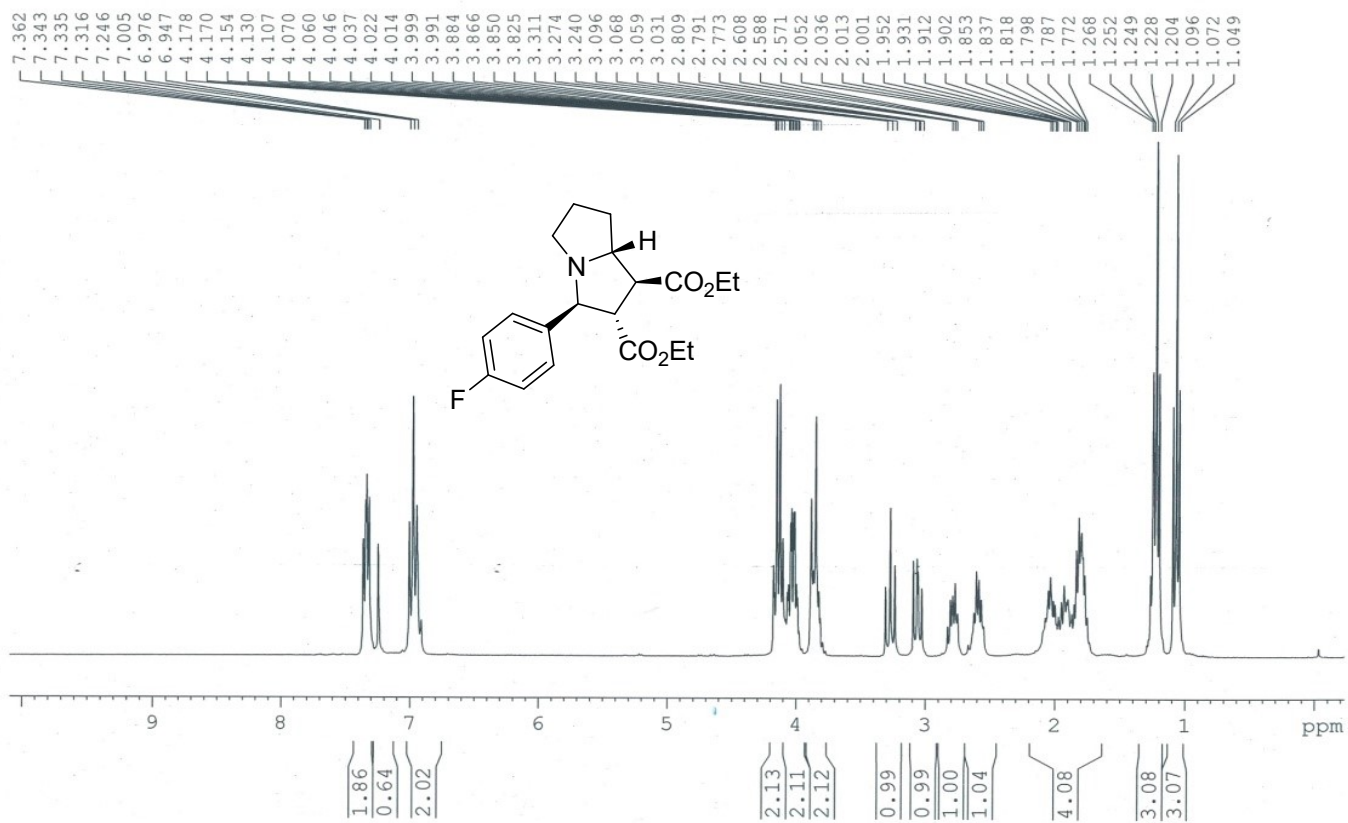



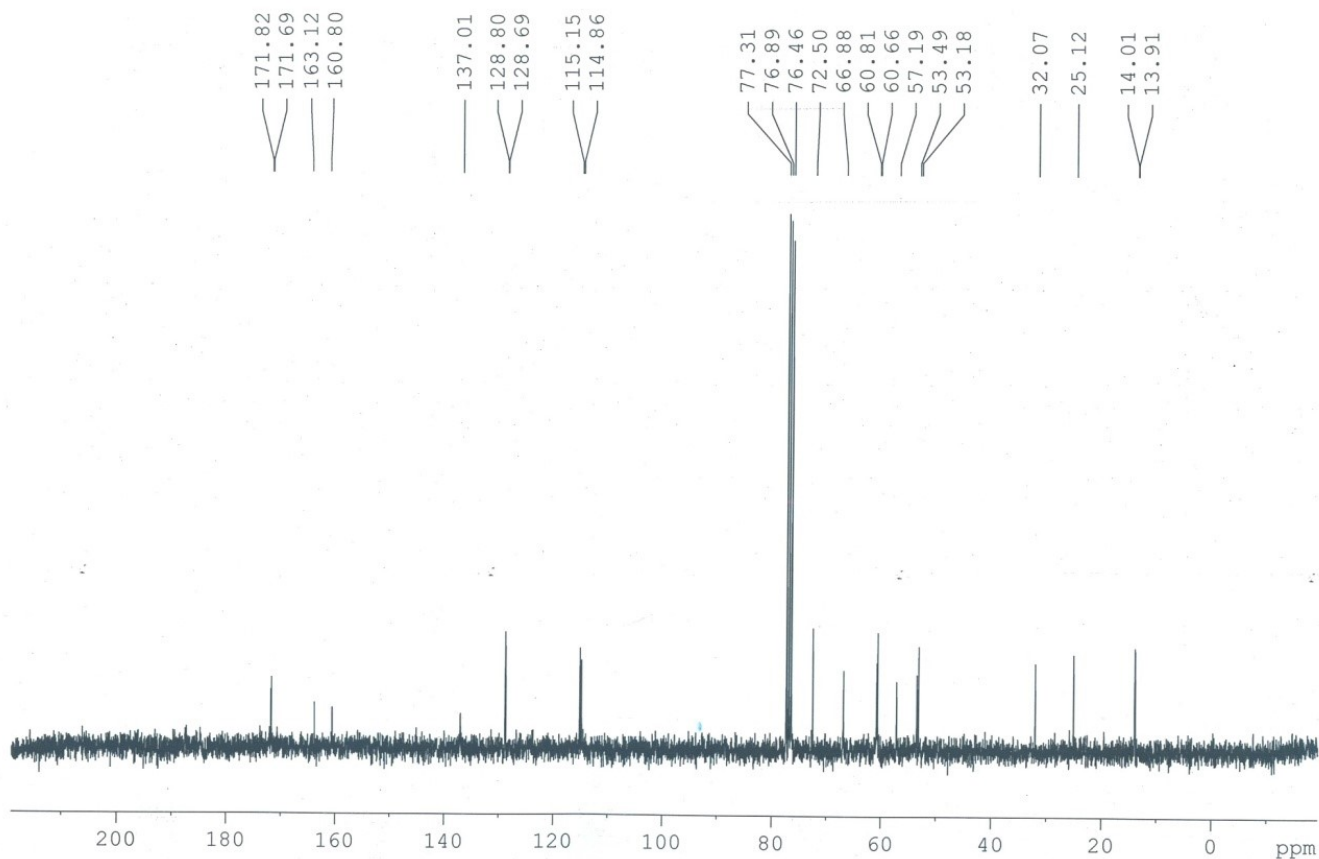

SI Figure 39:  $^1\text{H}$  and  $^{13}\text{C}$ -NMR spectra of compound **10b**

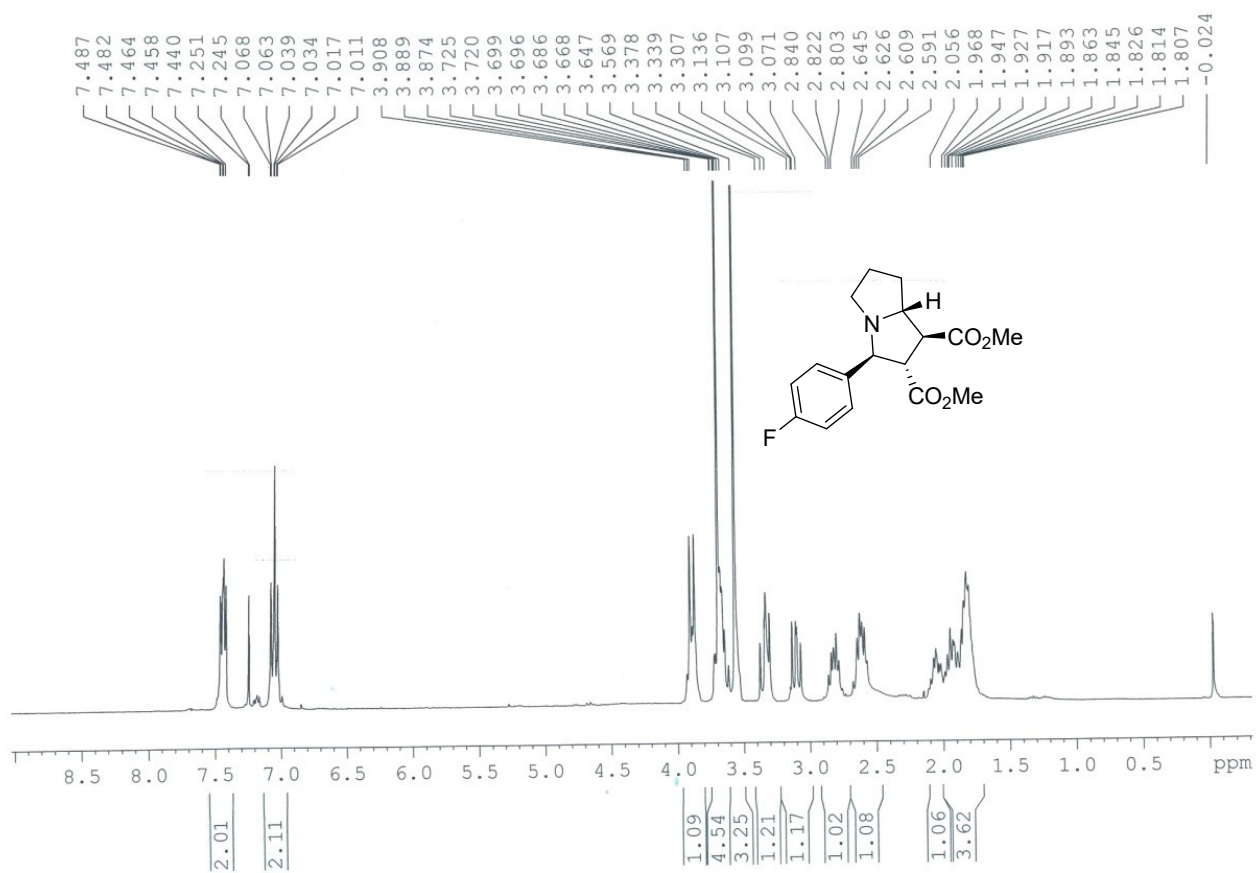

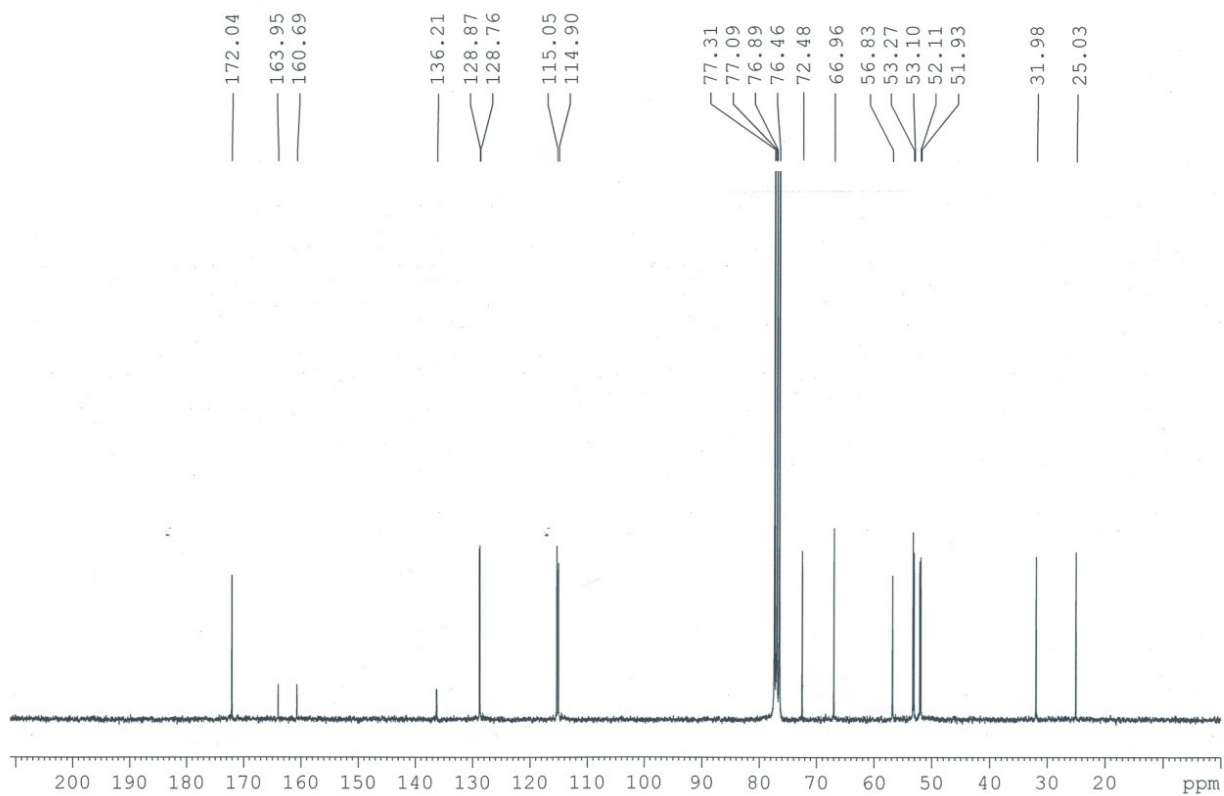

SI Figure 40:  $^1\text{H}$  and  $^{13}\text{C}$ -NMR spectra of compound 10c

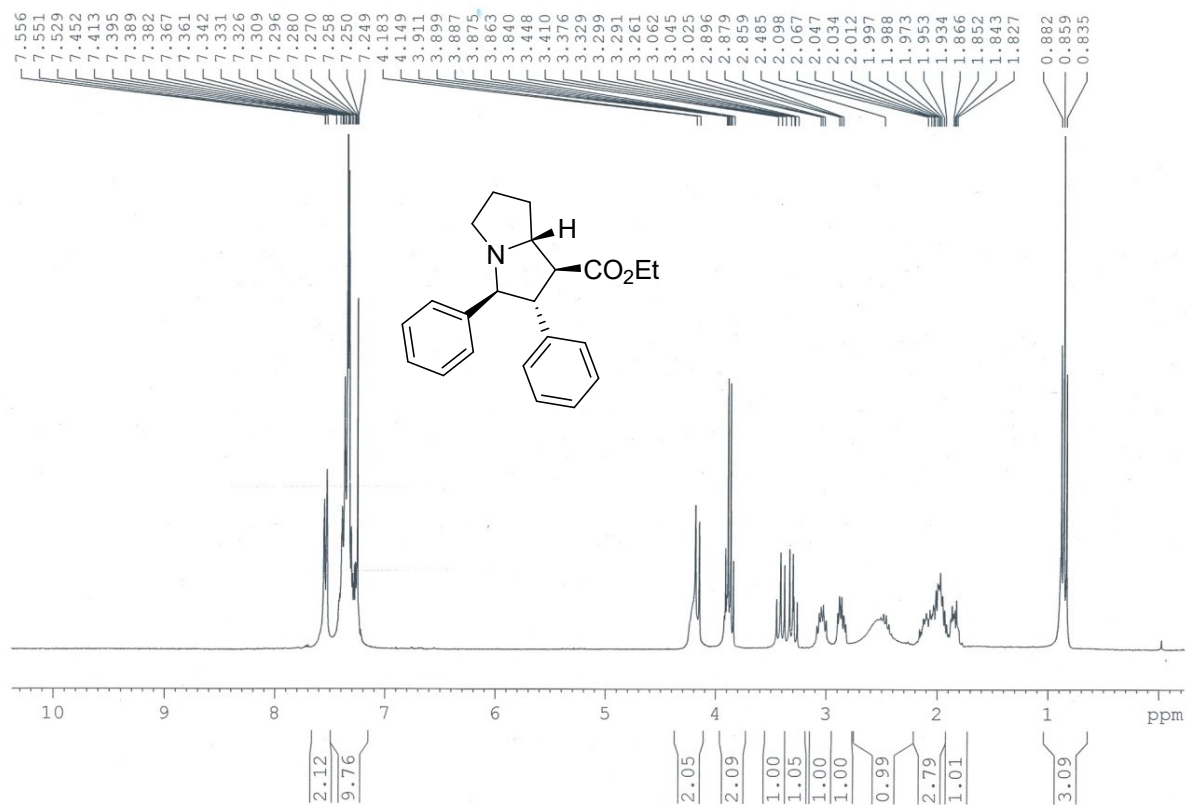

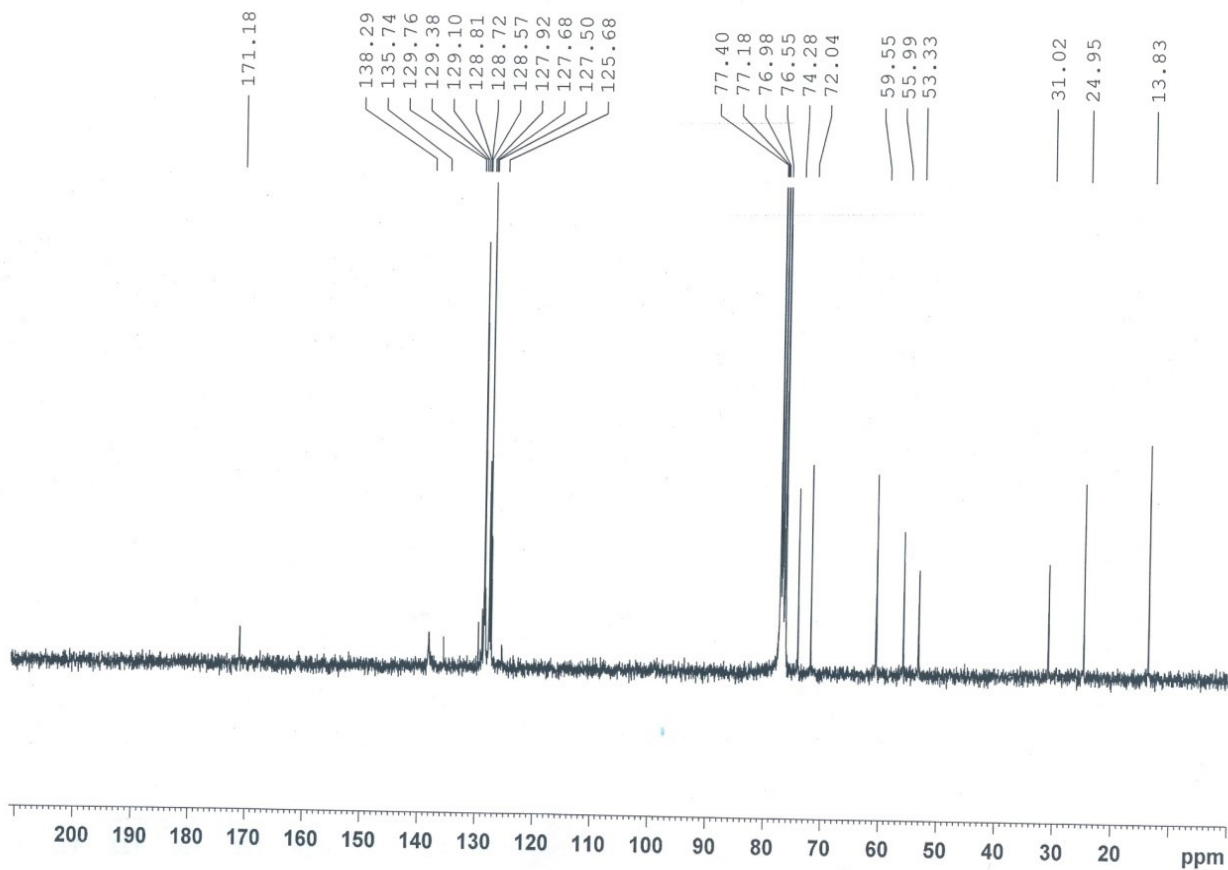

SI Figure 41:  $^1\text{H}$  and  $^{13}\text{C}$ -NMR spectra of compound 10d

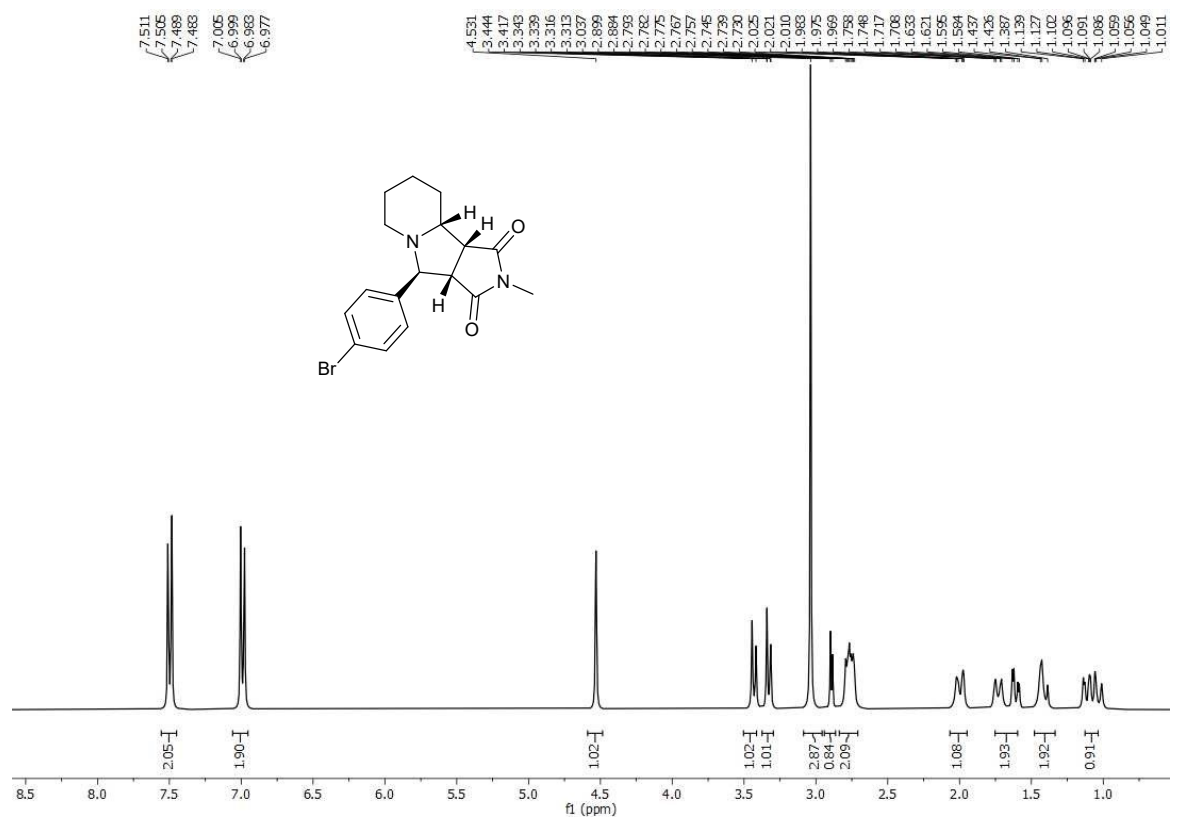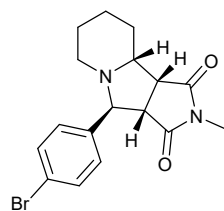

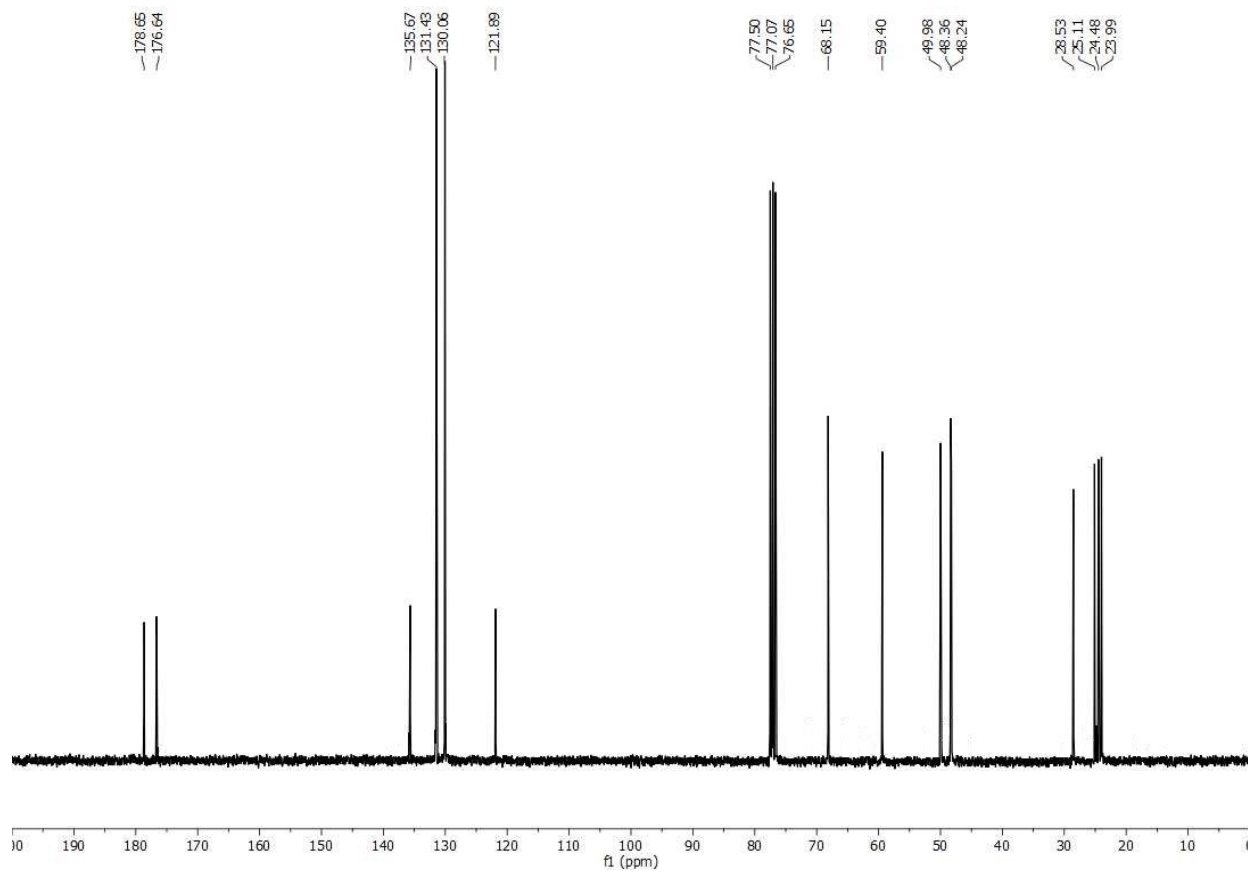

SI Figure 42:  $^1\text{H}$ ,  $^{13}\text{C}$  and  $^{19}\text{F}$ -NMR spectra of compound 10e

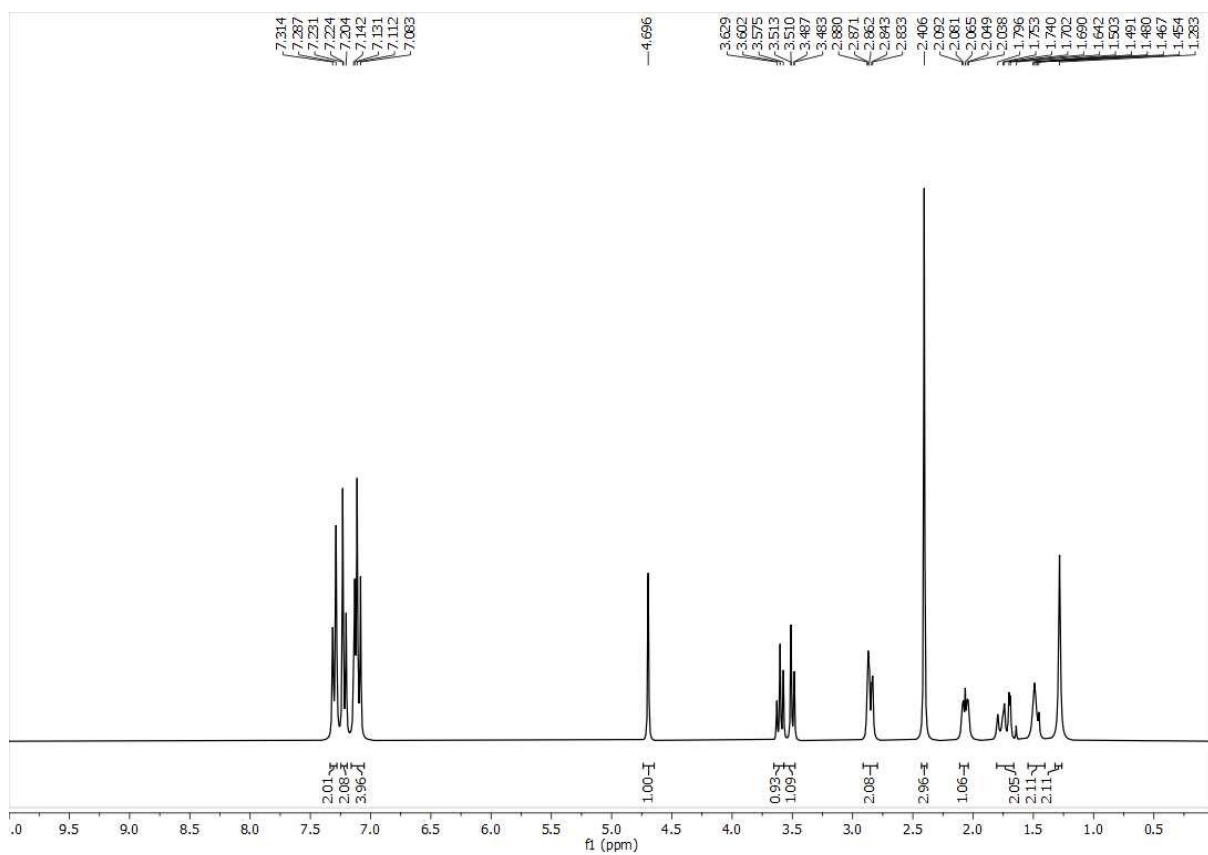

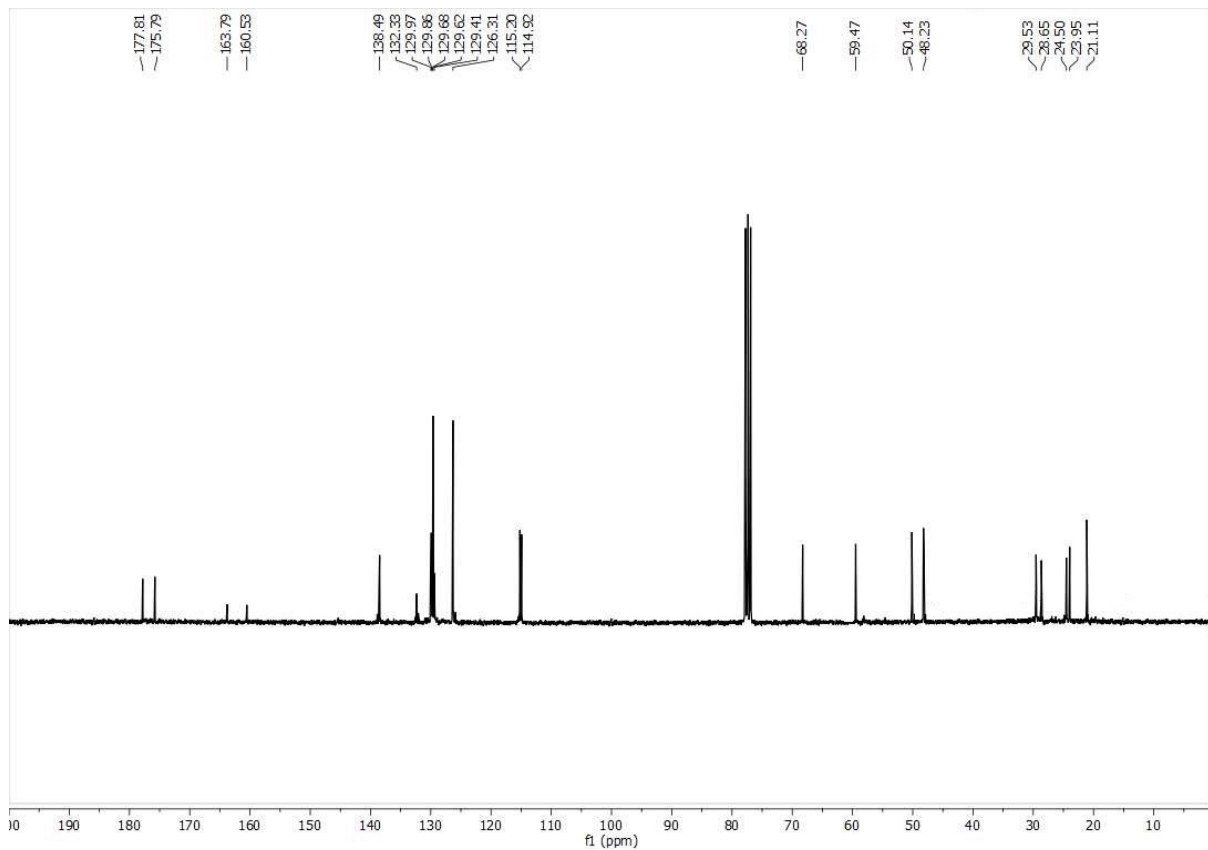

114.36

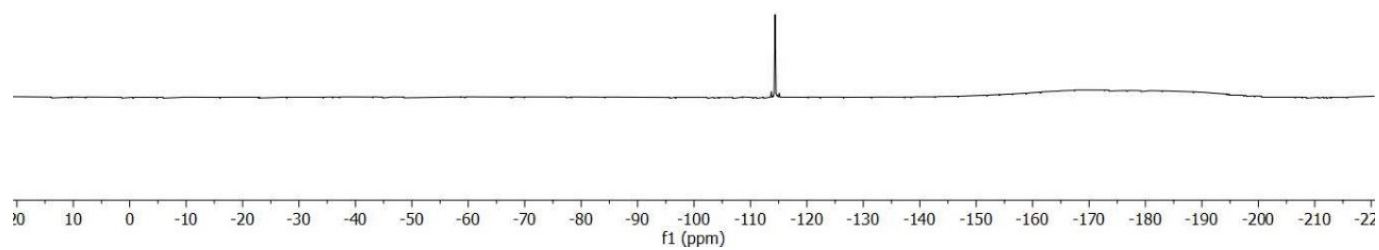

#### 4. (a) Crystal Summary Data of Compound 9a (CCDC 1832647)

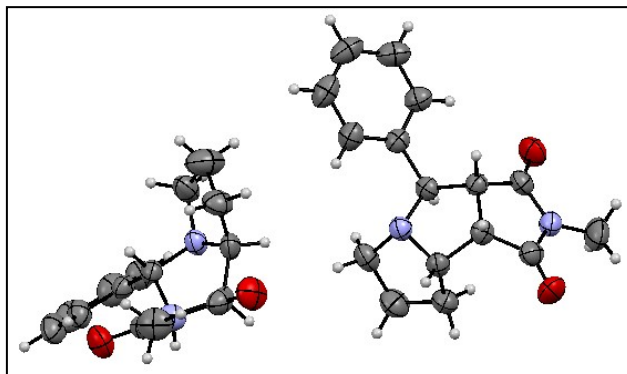

- ❖ Chemical formula and formula weight (M): C<sub>16</sub> H<sub>18</sub> N<sub>2</sub> O<sub>2</sub> and 270.14
- ❖ Crystal system: Triclinic
- ❖ Unit-cell dimensions (angstrom or pm, degrees) and volume, with edges: a=7.827(4) b=10.029(4) c=17.446(8) α=89.147(6) β=87.469(6) γ=82.695(6)
- ❖ Temperature: 296(2)
- ❖ Space group symbol: P -1
- ❖ No. of formula units in unit cell (Z): 4
- ❖ Number of reflections measured and/or number of independent reflections, Rint: 2746
- ❖ Final R values (and whether quoted for all or observed data): 0.0484

#### (b) Crystal Summary Data of Compound 10e (CCDC 2312186)

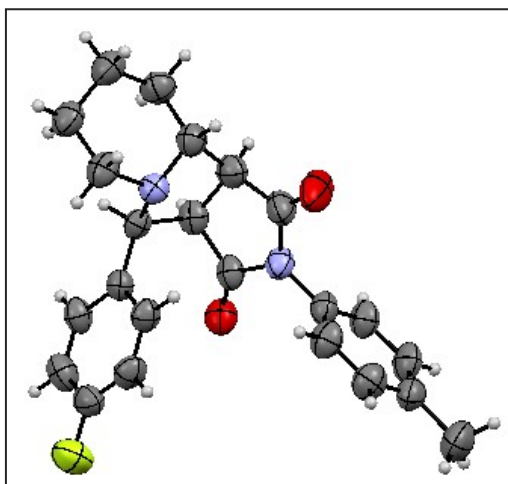

- ❖ Chemical formula and formula weight (M): C<sub>23</sub> H<sub>23</sub> F N<sub>2</sub> O<sub>2</sub> and 378.43
- ❖ Crystal system: Monoclinic
- ❖ Unit-cell dimensions (angstrom or pm, degrees) and volume, with edges: a=19.48(2) b=5.587(5) c=18.462(17) α=90 β=101.83(3) γ=90
- ❖ Temperature: 297(2)
- ❖ Space group symbol: P2(1)/c
- ❖ No. of formula units in unit cell (Z): 4
- ❖ Number of reflections measured and/or number of independent reflections, Rint: 2521
- ❖ Final R values (and whether quoted for all or observed data): 0.1224



## 5. Mass spectra data of intermediates

Mass spectra were taken in infusion method.

### Parameters :

Source - capillary (kv): 3.06, Sampling cone: 85, source offset: 80

Temp (°C) - Source: 120, Desolvation: 300

Gas flows – Cone gas (L/h) 50, Desolvation gas (L/h) 600, Lock spray capillary (kv) 2.50

In order to ascertain the reaction pathway we carried out mass kinetics, for that we withdraw a little aliquot from the reaction mixture and performed mass analysis to find out any probable intermediate(s). To our delight for both of the reactions we got peaks corresponding to the probable intermediates which are shown below and the corresponding time is also shown.

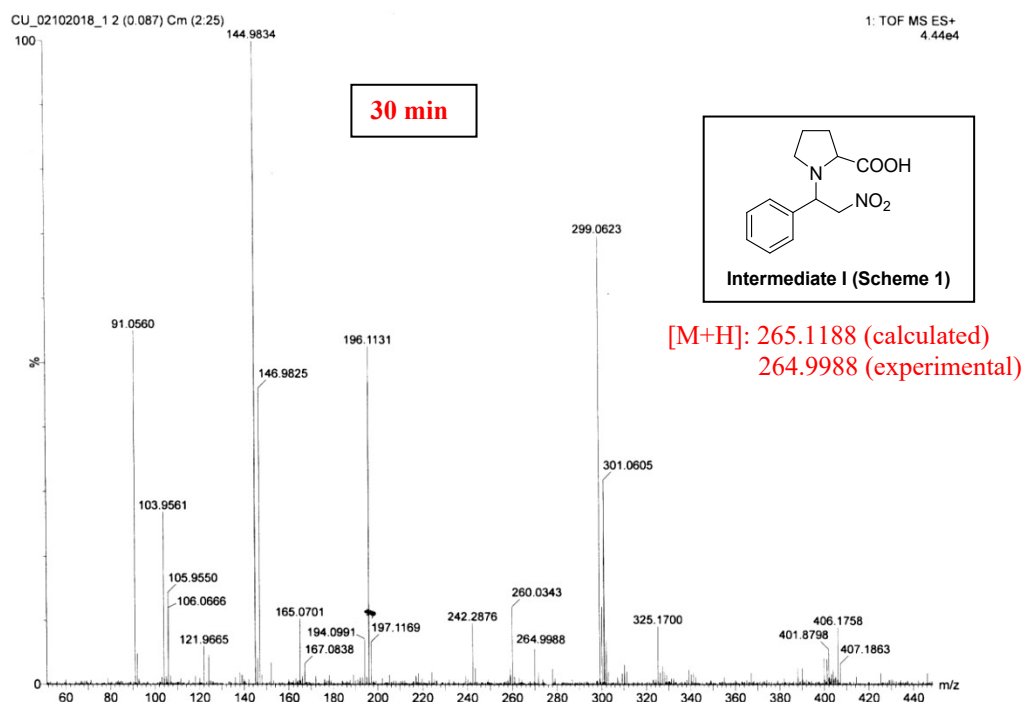

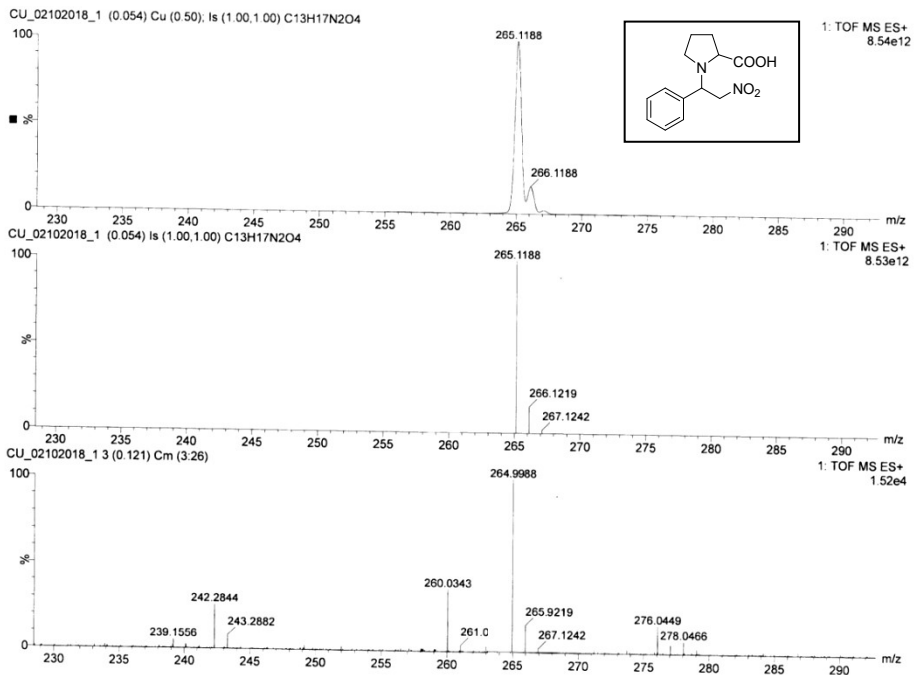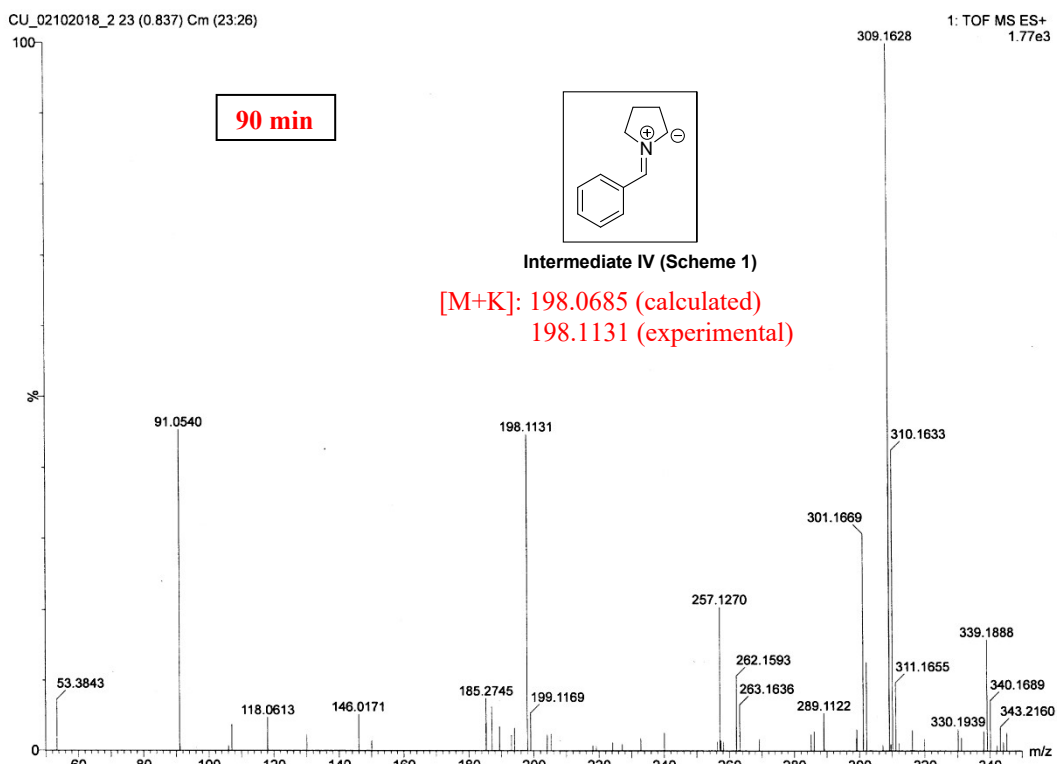

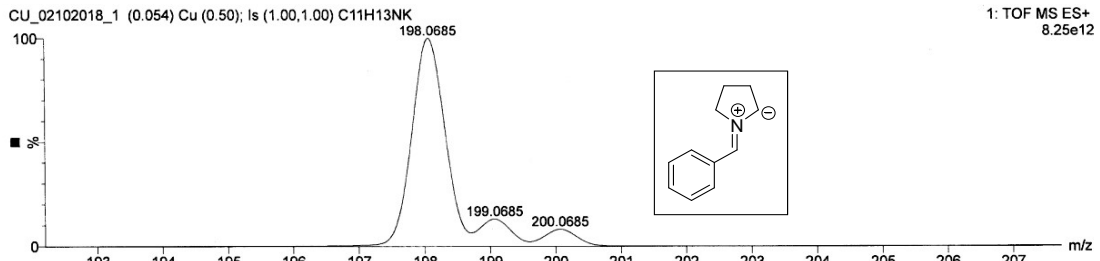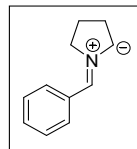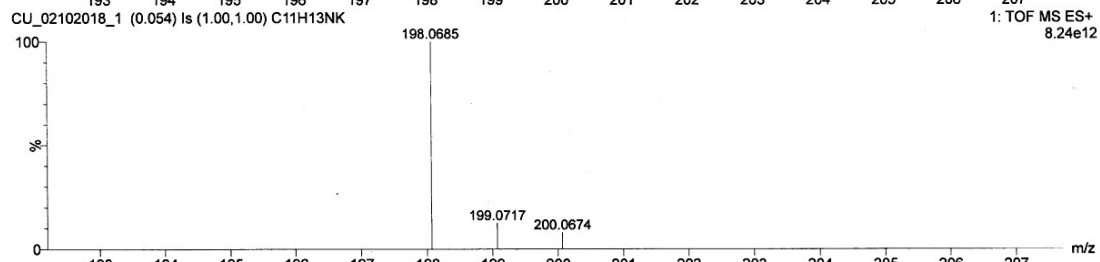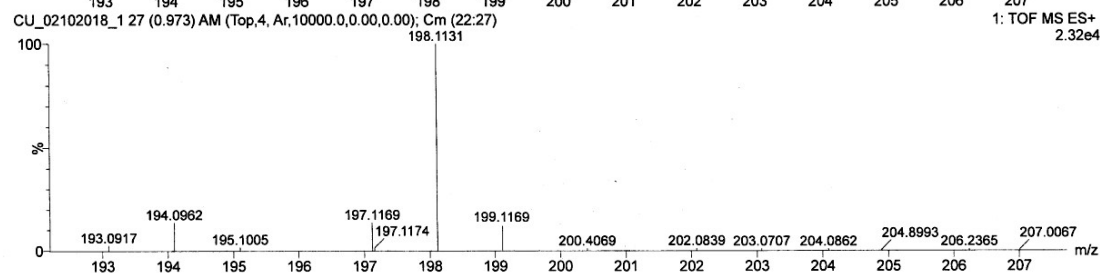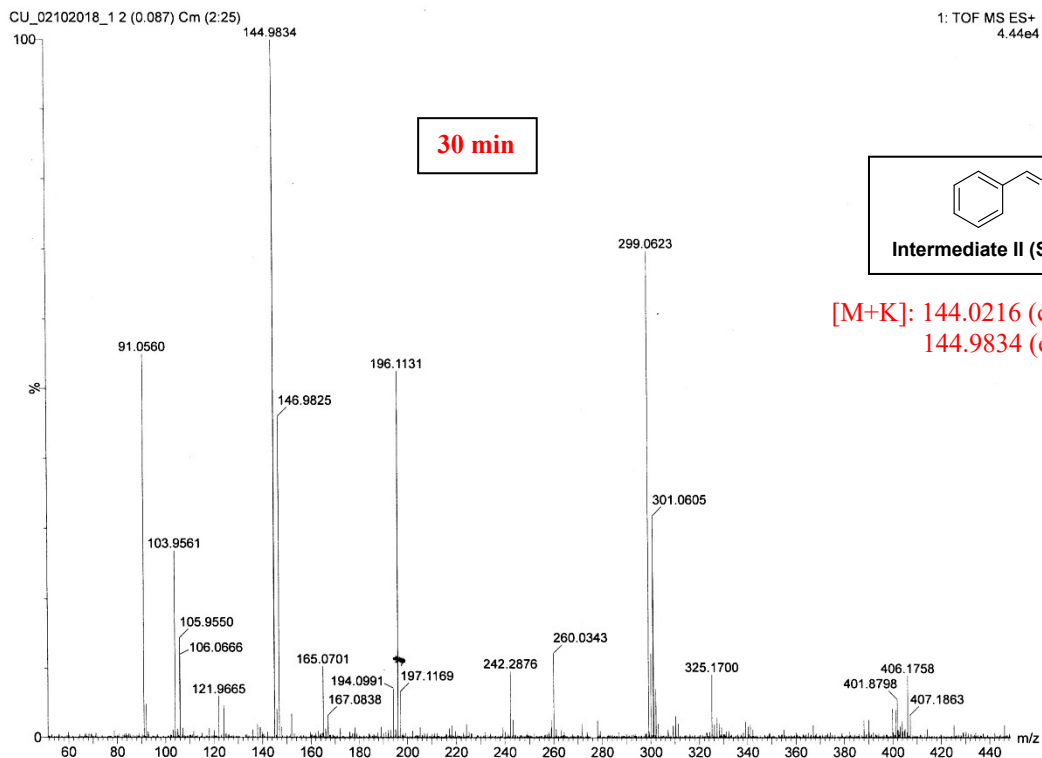

CU\_02102018\_3 (0.054) Cu (0.50); Is (1.00,1.00) C7H7NK

1: TOF MS ES+  
8.61e12

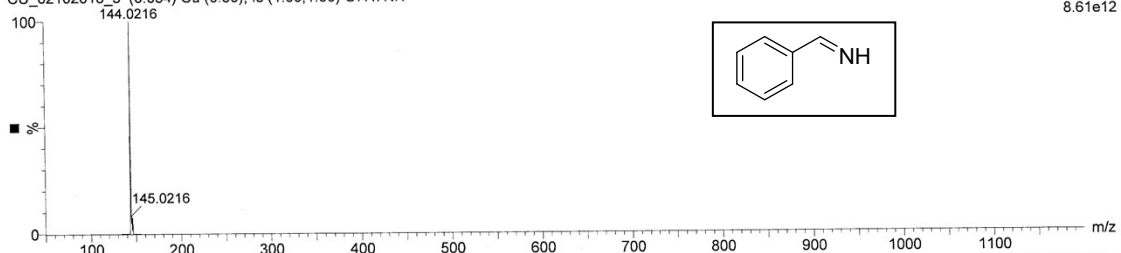

CU\_02102018\_3 (0.054) Is (1.00,1.00) C7H7NK

1: TOF MS ES+  
8.61e12

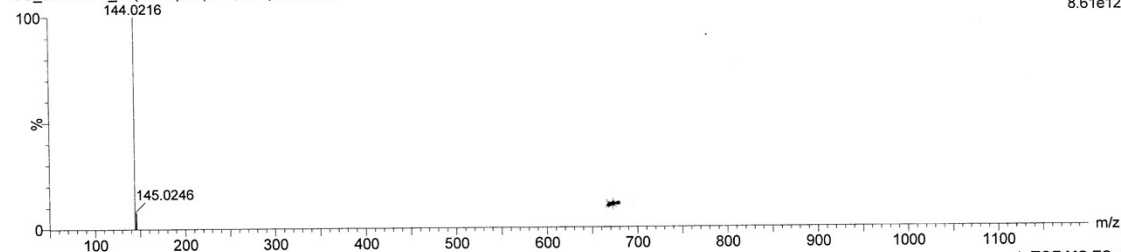

CU\_02102018\_3 2 (0.087) AM (Top,4, Ar,10000.0,0.00,0.00); Cm (2:27)

1: TOF MS ES+  
9.33e4

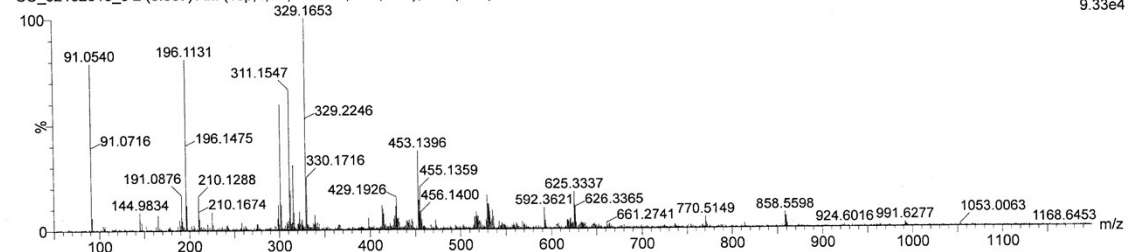

CU\_02102018\_1 27 (0.973) AM (Top,4, Ar,10000.0,0.00,0.00); Cm (22:27)

1: TOF MS ES+  
2.32e4

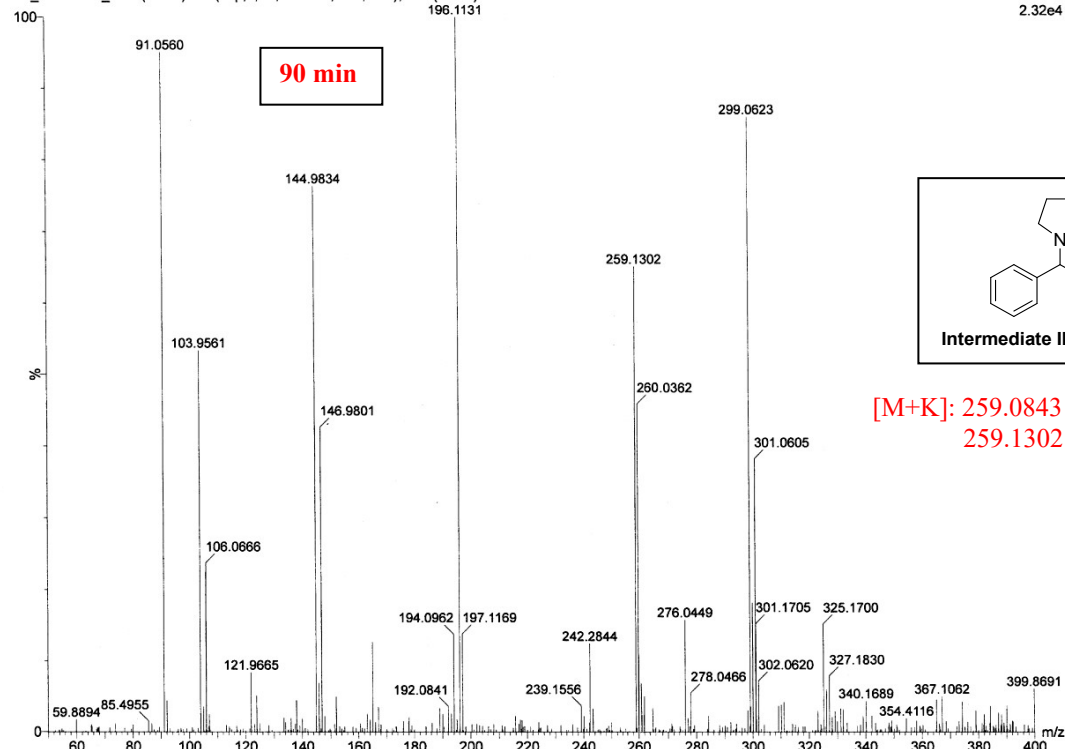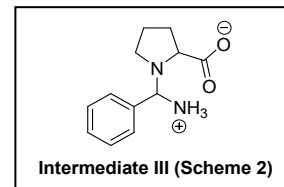

[M+K]: 259.0843 (calculated)  
259.1302 (experimental)

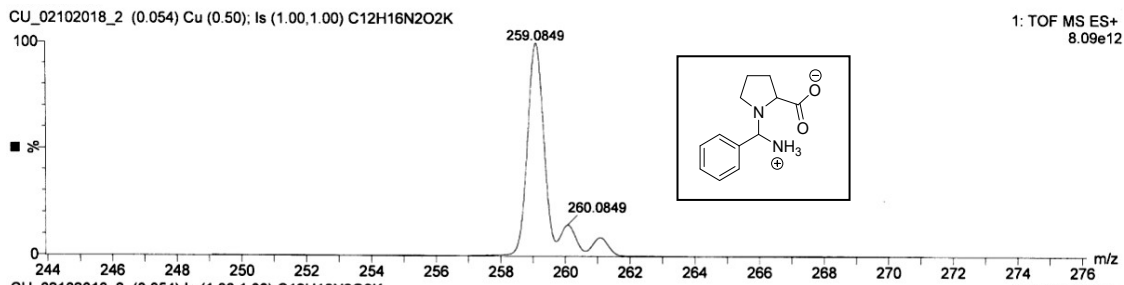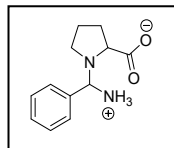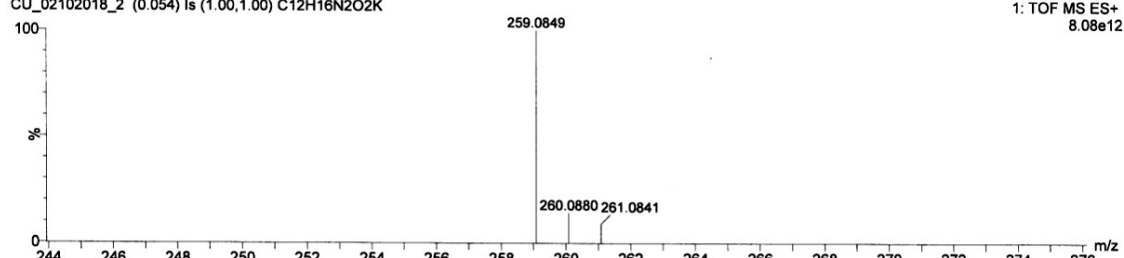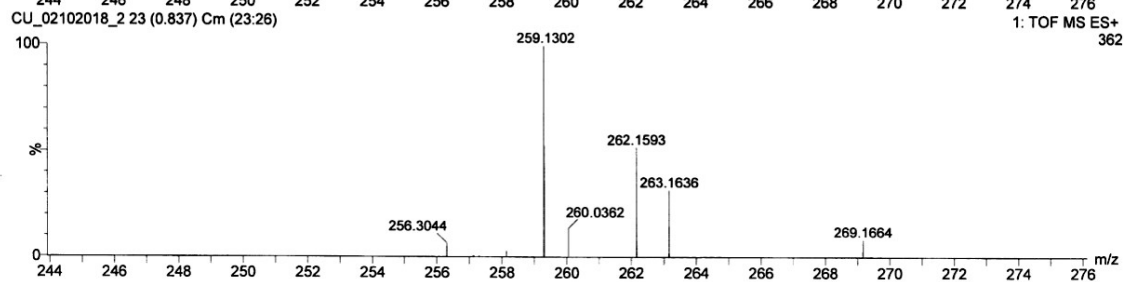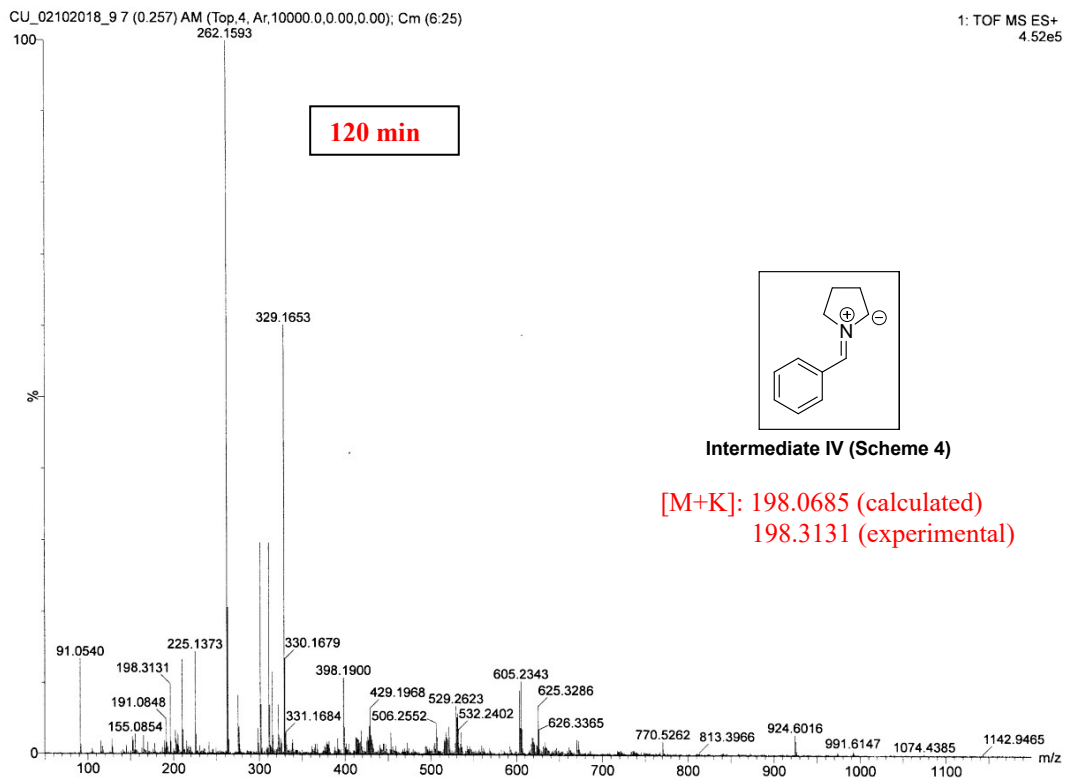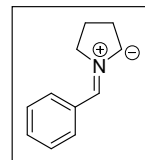

CU\_02102018\_9 (0.054) Cu (0.50); Is (1.00,1.00) C11H13NK

1: TOF MS ES+  
8.25e12

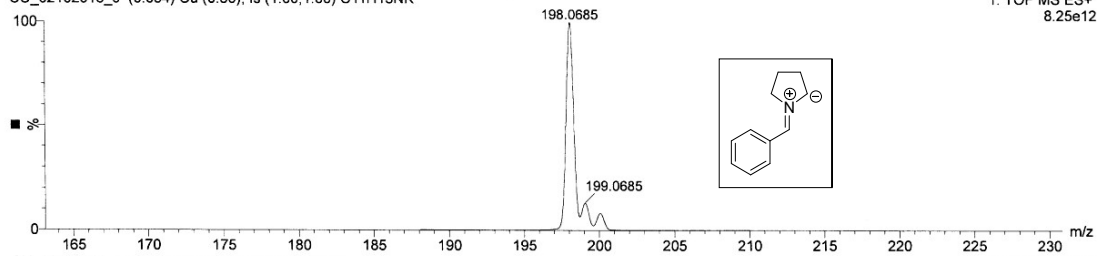

CU\_02102018\_9 (0.054) Is (1.00,1.00) C11H13NK

1: TOF MS ES+  
8.24e12

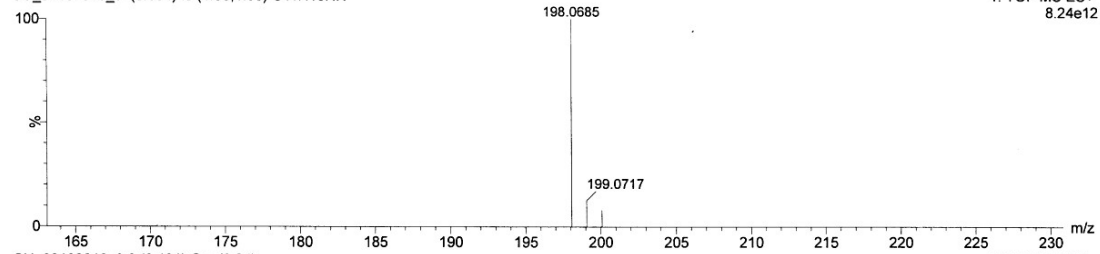

CU\_02102018\_9 3 (0.121) Cm (3:24)

1: TOF MS ES+  
1.85e4

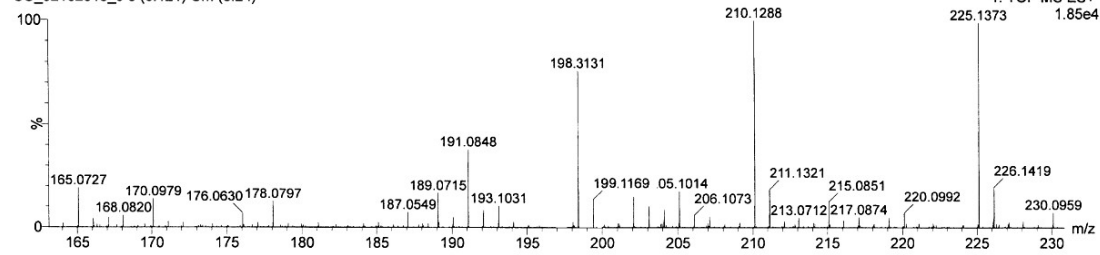

Supplement: d4ob01004c1.pdf [file d4ob01004c1.pdf]
